# Supplementary material for: Synthesis and reactivity of a six-membered heterocyclic 1,3-diphosphaallene
Source: Royal Society of Chemistry journal article supplement (doi:10.1039/d4sc06371f), 2024-11-29
Supplement: d4sc06371f1.pdf [file d4sc06371f1.pdf]

## Supporting Information

## Content

### 1. Experimental Section

### 2. Spectroscopic Characterization

**Figure S1-S4.**  $^1\text{H}$ ,  $^{13}\text{C}$ ,  $^{31}\text{P}$  NMR and IR spectra of compound **2**.

**Figure S5-S6.** Simulated IR spectrum of compound **2**.

**Figure S7-S10.**  $^1\text{H}$ ,  $^{13}\text{C}$ ,  $^{31}\text{P}$  NMR and IR spectra of compound **3**.

**Figure S11-S14.**  $^1\text{H}$ ,  $^{13}\text{C}$ ,  $^{31}\text{P}$  NMR and IR spectra of compound **4**.

**Figure S15.** Simulated IR spectrum of compound **4**.

**Figure S16-S19.**  $^1\text{H}$ ,  $^{13}\text{C}$ ,  $^{31}\text{P}$  NMR and IR spectra of compound **5**.

**Figure S20-S23.**  $^1\text{H}$ ,  $^{13}\text{C}$ ,  $^{31}\text{P}$  NMR and IR spectra of compound **6**.

**Figure S24.** Simulated IR spectrum of compound **6**.

**Figure S25-S26.** Stacked variable temperature (VT)  $^1\text{H}$  NMR spectra of **2**.

**Figure S27-S28.** Stacked variable temperature (VT)  $^{31}\text{P}$  NMR spectra of **2**.

### 3. Crystallographic Details

**Table S1, S2.** Crystal data and structure refinement parameters of compounds **2–4** and **6**.

**Figure S29-S32.** Molecular structures of compounds **2–4** and **6**.

### 4. UV-vis Spectroscopy

**Figure S33.** UV-visible spectrum of compound **2**.

**Figure S34.** Simulated UV-visible spectrum of compound **2**.

**Figure S35.** UV-visible spectrum of compound **3**.

**Figure S36.** Simulated UV-visible spectrum of compound **3**.

**Figure S37.** UV-visible spectrum of compound **4**.

**Figure S38.** Simulated UV-visible spectrum of compound **4**.

**Figure S39.** UV-visible spectrum of compound **5**.

**Figure S40.** UV-visible spectrum of compound **6**.

### 5. Computational Details

**Figure S41.** Mayer, Wiberg bond orders and NBO-charges of compound **2**.

**Figure S42.** Gibbs energies for the rearrangement from **S1** to **S2**.

**Figure S43-S51.** Natural transition orbitals of compounds **2-4**.

### 6. Cartesian Coordinates and Absolute Energies for the Calculated Compound

**Tables S3-5.** Absolute energies of the calculated compounds by means of different methods.

### 7. References

## 1. Experimental Section

**General procedure.** All experiments and manipulations were carried out under a dry argon atmosphere using either standard *Schlenk* techniques or an MBraun LABmaster Pro glovebox. THF, toluene, and *n*-hexane were dried using Braun solvent drying system, degassed, and stored over 4Å molecular sieve. Benzene-*d*<sub>6</sub> was dried by refluxing over NaK, distilled prior to use, and stored over 4Å molecular sieve. Commercial reagents were purchased from Aldrich, Acros, or Alfa-Aesar Chemical Co. and used as received. LGa(OCP)P=GaL **1** (L = HC[C(Me)N(Ar)]<sub>2</sub>, Ar = 2,6-*i*Pr<sub>2</sub>C<sub>6</sub>H<sub>3</sub>),<sup>[1,2]</sup> MeNHC,<sup>[3]</sup> *i*PrNHC,<sup>[3]</sup> and cAAC·LiOTf<sup>[4]</sup> were prepared according to literature procedures. Trimethylsilyldiazomethane (0.6 M solution in *n*-hexane) was purchased from sigma-aldrich and used as received. NMR spectra (<sup>1</sup>H, <sup>13</sup>C, and <sup>31</sup>P) were recorded on a Bruker Avance III HD 300 (<sup>1</sup>H 300 MHz, <sup>13</sup>C{<sup>1</sup>H} 75 MHz, <sup>31</sup>P{<sup>1</sup>H} 121 MHz), or a Bruker Avance III HD 400 (<sup>1</sup>H 400 MHz, <sup>13</sup>C{<sup>1</sup>H} 100 MHz, <sup>31</sup>P{<sup>1</sup>H} 161 MHz), or a Bruker Avance II 500 (<sup>1</sup>H 500 MHz, <sup>13</sup>C{<sup>1</sup>H} 150 MHz, <sup>31</sup>P{<sup>1</sup>H} 202 MHz) spectrometer and were referenced to internal C<sub>6</sub>D<sub>5</sub>H (<sup>1</sup>H δ = 7.16; <sup>13</sup>C δ = 128.06) or external 85% H<sub>3</sub>PO<sub>4</sub> (<sup>31</sup>P, δ = 0) using chi-values (χ).<sup>[5]</sup> Elemental analyses were performed at the *Elementaranalyse Labor* of the University of Duisburg-Essen. IR spectra were recorded by a Bruker ALPHA-T FT-IR spectrometer equipped with a single-reflection ATR sampling module.

### Synthesis of compound 2.

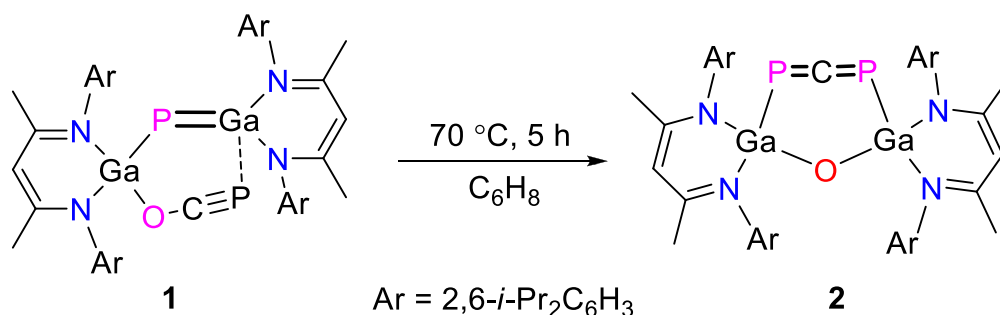

A toluene (20 mL) solution of LGa(OCP)P=GaL **1** (1.0 g, 0.94 mmol) was heated at 70 °C for 5 h, yielding an olive colored solution. All volatiles were removed in *vacuo* to yield a olive colored crystalline powder. Yield: 98% (980 mg). M.p. 121 °C (dec.). Single crystals suitable for X-ray diffraction were grown by diffusing *n*-hexane into a saturated benzene solution of **2** at ambient temperature. Anal. calcd. (%) for C<sub>59</sub>H<sub>82</sub>Ga<sub>2</sub>N<sub>4</sub>OP<sub>2</sub> (1064.70): C, 66.56; H, 7.76; N, 5.26. Found: C, 66.63; H, 7.84; N, 5.31. <sup>1</sup>H NMR (300 MHz, C<sub>6</sub>D<sub>6</sub>, 298 K) δ = 0.84 (d, <sup>3</sup>J<sub>HH</sub> = 6.6 Hz, 6H, CH(CH<sub>3</sub>)<sub>2</sub>), 1.01 (d, <sup>3</sup>J<sub>HH</sub> = 6.6 Hz, 6H, CH(CH<sub>3</sub>)<sub>2</sub>), 1.06 (d, <sup>3</sup>J<sub>HH</sub> = 6.8 Hz, 6H, CH(CH<sub>3</sub>)<sub>2</sub>), 1.09 (d, <sup>3</sup>J<sub>HH</sub> = 6.7 Hz, 6H, CH(CH<sub>3</sub>)<sub>2</sub>), 1.24 (d, <sup>3</sup>J<sub>HH</sub> = 6.6 Hz, 6H, CH(CH<sub>3</sub>)<sub>2</sub>), 1.37 (d, <sup>3</sup>J<sub>HH</sub> = 6.6 Hz, 6H, CH(CH<sub>3</sub>)<sub>2</sub>), 1.41 (d, <sup>3</sup>J<sub>HH</sub> = 6.8 Hz, 6H, CH(CH<sub>3</sub>)<sub>2</sub>), 1.46 (s, 6H, CCH<sub>3</sub>), 1.52 (s, 6H, CCH<sub>3</sub>), 1.66 (d, <sup>3</sup>J<sub>HH</sub> = 6.7

Hz, 6H, CH(CH<sub>3</sub>)<sub>2</sub>), 3.09 (sept, <sup>3</sup>J<sub>HH</sub> = 6.6 Hz, 2H, CH(CH<sub>3</sub>)<sub>2</sub>), 3.21 (sept, <sup>3</sup>J<sub>HH</sub> = 6.8 Hz, 2H, CH(CH<sub>3</sub>)<sub>2</sub>), 3.26 (sept, <sup>3</sup>J<sub>HH</sub> = 6.7 Hz, 2H, CH(CH<sub>3</sub>)<sub>2</sub>), 4.19 (sept, <sup>3</sup>J<sub>HH</sub> = 6.7 Hz, 2H, CH(CH<sub>3</sub>)<sub>2</sub>), 4.77 (s, 2H, CH), 7.06 (d, <sup>3</sup>J<sub>HH</sub> = 6.9 Hz, 2H, C<sub>6</sub>H<sub>3</sub>), 7.12 (d, <sup>3</sup>J<sub>HH</sub> = 7.2 Hz, 6H, C<sub>6</sub>H<sub>3</sub>), 7.23 (d, <sup>3</sup>J<sub>HH</sub> = 7.6 Hz, 2H, C<sub>6</sub>H<sub>3</sub>), 7.29 (d, <sup>3</sup>J<sub>HH</sub> = 7.5 Hz, 2H, C<sub>6</sub>H<sub>3</sub>). <sup>13</sup>C{<sup>1</sup>H} NMR (75 MHz, C<sub>6</sub>D<sub>6</sub>, 298 K) δ = 23.5, 23.8, 24.6, 24.7, 25.0, 25.1, 25.3, 26.2 (CH(CH<sub>3</sub>)<sub>2</sub>), 27.6, 28.8, 29.9 (CH(CH<sub>3</sub>)<sub>2</sub>), 96.2 (CH), 124.0, 124.1, 124.2, 125.2, 127.0, 127.1, 142.5, 142.8, 142.9, 143.4, 144.5, 146.2, 169.0, 170.3 (C<sub>6</sub>H<sub>3</sub>), 272.1 (t, J<sub>CP</sub> = 73.3 Hz, PCP). <sup>31</sup>P{<sup>1</sup>H} (121 MHz, C<sub>6</sub>D<sub>6</sub>, 298 K) δ = -30.9 ppm. ATR-IR: ν 2995, 2928, 2868, 1526, 1435, 1386, 1313, 1255, 1176, 1096, 1021, 935, 862, 794, 759, 740, 678, 627, 602, 517 cm<sup>-1</sup>.

### Synthesis of compound 3.

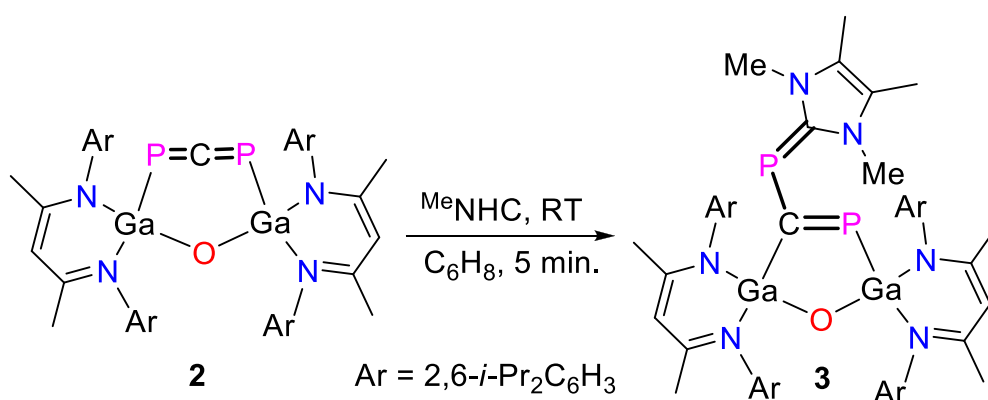

To a toluene (5 mL) solution of **2** (100 mg, 0.094 mmol), MeNHC (12 mg, 0.094 mmol) was added in one portion at ambient temperature. The olive color immediately turned to red. All volatiles were then removed in *vacuo* to yield **3** as a red crystalline solid. Yield: 97% (108 mg). M.p. 141 °C (dec.). Single crystals suitable for X-ray diffraction were grown by storing a saturated *n*-hexane solution of **3** at -30 °C for 12 hours. Anal. calcd. (%) for C<sub>66</sub>H<sub>94</sub>Ga<sub>2</sub>N<sub>6</sub>OP<sub>2</sub> (1188.89): C, 66.68; H, 7.97; N, 7.07. Found: C, 66.53; H, 7.93; N, 7.06. <sup>1</sup>H NMR (400 MHz, C<sub>6</sub>D<sub>6</sub>, 298 K) δ = 0.48 (d, <sup>3</sup>J<sub>HH</sub> = 6.8 Hz, 3H, CH(CH<sub>3</sub>)<sub>2</sub>), 0.90 (pst, <sup>3</sup>J<sub>HH</sub> = 6.8 Hz, 3H, CH(CH<sub>3</sub>)<sub>2</sub>), 0.97 (d, <sup>3</sup>J<sub>HH</sub> = 6.6 Hz, 3H, CH(CH<sub>3</sub>)<sub>2</sub>), 1.03 (d, <sup>3</sup>J<sub>HH</sub> = 6.6 Hz, 3H, CH(CH<sub>3</sub>)<sub>2</sub>), 1.14 (d, <sup>3</sup>J<sub>HH</sub> = 6.8 Hz, 3H, CH(CH<sub>3</sub>)<sub>2</sub>), 1.17 (pst, <sup>3</sup>J<sub>HH</sub> = 6.3 Hz, 6H, CH(CH<sub>3</sub>)<sub>2</sub>), 1.24 (br, 6H, CCH<sub>3</sub>), 1.30 (d, <sup>3</sup>J<sub>HH</sub> = 6.8 Hz, 3H, CH(CH<sub>3</sub>)<sub>2</sub>), 1.33 (d, <sup>3</sup>J<sub>HH</sub> = 3.2 Hz, 3H, CH(CH<sub>3</sub>)<sub>2</sub>), 1.34 (d, <sup>3</sup>J<sub>HH</sub> = 3.2 Hz, 3H, CH(CH<sub>3</sub>)<sub>2</sub>), 1.38 (d, <sup>3</sup>J<sub>HH</sub> = 6.8 Hz, 3H, CH(CH<sub>3</sub>)<sub>2</sub>), 1.47 (d, <sup>3</sup>J<sub>HH</sub> = 3.2 Hz, 3H, CH(CH<sub>3</sub>)<sub>2</sub>), 1.49 (d, <sup>3</sup>J<sub>HH</sub> = 3.2 Hz, 3H, CH(CH<sub>3</sub>)<sub>2</sub>), 1.53 (s, 3H, CCH<sub>3</sub>), 1.54 (s, 3H, CCH<sub>3</sub>), 1.61 (s, 3H, CCH<sub>3</sub>), 1.67 (s, 3H, CCH<sub>3</sub>), 1.73 (pst, <sup>3</sup>J<sub>HH</sub> = 6.8 Hz, 6H, CH(CH<sub>3</sub>)<sub>2</sub>), 1.80 (d, <sup>3</sup>J<sub>HH</sub> = 6.5 Hz, 3H, CH(CH<sub>3</sub>)<sub>2</sub>), 1.83 (d, <sup>3</sup>J<sub>HH</sub> = 6.7 Hz, 3H, CH(CH<sub>3</sub>)<sub>2</sub>), 2.60 (s, 6H, CCH<sub>3</sub>), 3.00 (sept, <sup>3</sup>J<sub>HH</sub> = 6.7 Hz, 1H, CH(CH<sub>3</sub>)<sub>2</sub>), 3.05 (sept, <sup>3</sup>J<sub>HH</sub> = 6.7 Hz, 1H, CH(CH<sub>3</sub>)<sub>2</sub>), 3.43 (sept, <sup>3</sup>J<sub>HH</sub> = 6.7 Hz, 1H, CH(CH<sub>3</sub>)<sub>2</sub>), 3.51 (sept, <sup>3</sup>J<sub>HH</sub> = 6.7 Hz, 1H, CH(CH<sub>3</sub>)<sub>2</sub>), 3.61 (sept, <sup>3</sup>J<sub>HH</sub> = 6.7 Hz, 1H,

$CH(CH_3)_2$ ), 4.04 (sept,  $^3J_{HH} = 6.7$  Hz, 1H,  $CH(CH_3)_2$ ), 4.60 (sept,  $^3J_{HH} = 6.7$  Hz, 1H,  $CH(CH_3)_2$ ), 4.69 (sept,  $^3J_{HH} = 6.7$  Hz, 1H,  $CH(CH_3)_2$ ), 4.90 (s, 1H, CH), 5.03 (s, 1H, CH), 6.96–6.99 (m, 3H,  $C_6H_3$ ), 7.04–7.07 (m, 2H,  $C_6H_3$ ), 7.11–7.14 (m, 2H,  $C_6H_3$ ), 7.26 (t,  $^3J_{HH} = 7.6$  Hz, 1H,  $C_6H_3$ ), 7.31–7.36 (m, 3H,  $C_6H_3$ ), 7.38–7.40 (m, 1H,  $C_6H_3$ ).  $^{13}C\{^1H\}$  NMR (100 MHz,  $C_6D_6$ , 298 K)  $\delta = 8.0$ , 14.4 ( $CH_3$ ), 23.1, 24.2, 24.5, 24.7, 24.8, 24.9, 25.0, 25.1, 25.3, 25.4, 25.5, 25.6, 25.7, 26.1, 26.5 ( $CH(CH_3)_2$ ), 27.0, 27.6, 27.7, 28.1, 28.2, 28.4, 29.0, 29.1, 29.3, 29.4, 29.7 ( $CH(CH_3)_2$ ), 32.0 (CC), 97.4, 99.4 (CH), 122.9, 123.2, 123.3, 123.5, 123.6, 123.9, 124.0, 125.4, 125.5, 125.6, 125.7, 126.6, 126.8, 142.7, 143.7, 144.8, 145.5, 146.0, 146.2, 146.5, 146.6, 147.0, 147.1, 147.2, 163.7 (dd,  $J_{CP} = 9.63$  and 124.68 Hz, PCPC), 168.2, 168.7, 169.2, 169.9 ( $C_6H_3$ ), 233.1 (dd,  $J_{CP} = 94.92$  and 110.05 Hz, PCPC).  $^{31}P\{^1H\}$  (121 MHz,  $C_6D_6$ , 298 K)  $\delta = 168.59$  (d,  $^2J_{PP} = 18.0$  Hz, PCP), 74.73 (d,  $^2J_{PP} = 18.0$  Hz, PCP). ATR-IR:  $\nu$  2955, 2922, 2864, 1621, 1524, 1435, 1394, 1315, 1255, 1175, 1098, 1020, 933, 854, 794, 760, 684, 639, 562, 529  $cm^{-1}$ .

#### Synthesis of compound 4.

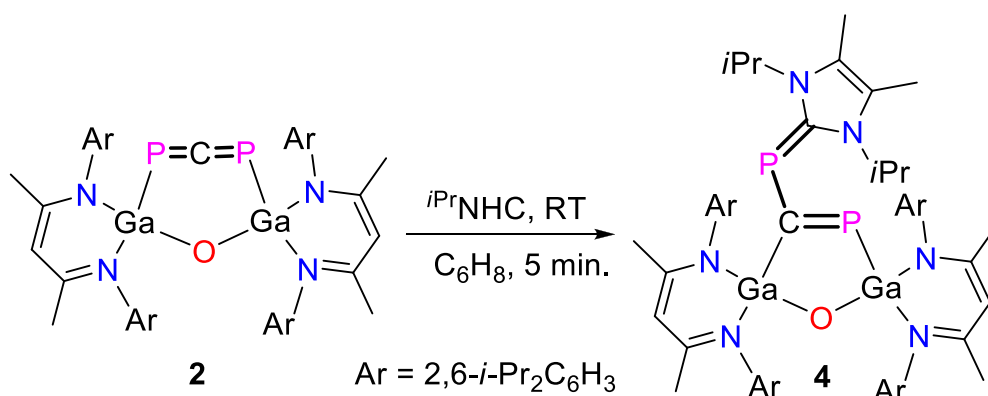

To a toluene (5 mL) solution of **2** (100 mg, 0.094 mmol),  $iPrNHC$  (17 mg, 0.094 mmol) was added in one portion at ambient temperature. The olive color immediately turned to red. All volatiles were then removed in *vacuo* to yield **4** as a red crystalline solid. Yield: 98% (114 mg). M.p. 147 °C (dec.). Single crystals suitable for X-ray diffraction were grown by diffusing *n*-hexane into a saturated benzene solution of **4** at ambient temperature. Anal. calcd. (%) for  $C_{70}H_{102}Ga_2N_6OP_2$  (1244.99): C, 67.53; H, 8.26; N, 6.75. Found: C, 67.58; H, 8.31; N, 6.81.  $^1H$  NMR (300 MHz,  $C_6D_6$ , 298 K)  $\delta = 0.45$  (d,  $^3J_{HH} = 6.8$  Hz, 3H,  $CH(CH_3)_2$ ), 0.87 (br, 6H,  $CH(CH_3)_2$ ), 1.02 (d,  $^3J_{HH} = 6.8$  Hz, 3H,  $CH(CH_3)_2$ ), 1.04 (d,  $^3J_{HH} = 6.8$  Hz, 3H,  $CH(CH_3)_2$ ), 1.13 (d,  $^3J_{HH} = 6.8$  Hz, 3H,  $CH(CH_3)_2$ ), 1.18–1.20 (m, 6H,  $CH(CH_3)_2$ ) 1.29 (d,  $^3J_{HH} = 6.8$  Hz, 3H,  $CH(CH_3)_2$ ), 1.32 (d,  $^3J_{HH} = 6.8$  Hz, 6H,  $CH(CH_3)_2$ ), 1.40 (br, 6H,  $CCH_3$ ), 1.46–1.49 (m, 9H,  $CH(CH_3)_2$ ) 1.50 (s, 3H,  $CCH_3$ ), 1.53 (s, 3H,  $CCH_3$ ), 1.60 (s, 6H,  $CCH_3$ ), 1.62 (d,  $^3J_{HH} = 6.8$  Hz, 3H,  $CH(CH_3)_2$ ), 1.17 (d,  $^3J_{HH} = 6.8$  Hz, 3H,  $CH(CH_3)_2$ ), 1.72 (d,  $^3J_{HH} = 6.8$  Hz, 3H,  $CH(CH_3)_2$ ), 1.80 (d,  $^3J_{HH} = 6.8$  Hz, 3H,  $CH(CH_3)_2$ ), 2.96 (sept,  $^3J_{HH} = 6.8$  Hz, 1H,

CH(CH<sub>3</sub>)<sub>2</sub>), 3.08 (sept, <sup>3</sup>J<sub>HH</sub> = 6.8 Hz, 1H, CH(CH<sub>3</sub>)<sub>2</sub>), 3.31 (sept, <sup>3</sup>J<sub>HH</sub> = 6.8 Hz, 0.5H, CH(CH<sub>3</sub>)<sub>2</sub>), 3.44 (sept, <sup>3</sup>J<sub>HH</sub> = 6.8 Hz, 1.5H, CH(CH<sub>3</sub>)<sub>2</sub>), 3.57 (sept, <sup>3</sup>J<sub>HH</sub> = 6.8 Hz, 2.5H, CH(CH<sub>3</sub>)<sub>2</sub>), 4.09 (sept, <sup>3</sup>J<sub>HH</sub> = 6.8 Hz, 1.5H, CH(CH<sub>3</sub>)<sub>2</sub>), 4.54 (sept, <sup>3</sup>J<sub>HH</sub> = 6.8 Hz, 1H, CH(CH<sub>3</sub>)<sub>2</sub>), 4.63 (sept, <sup>3</sup>J<sub>HH</sub> = 6.8 Hz, 1H, CH(CH<sub>3</sub>)<sub>2</sub>), 4.96 (s, 1H, CH), 5.06 (s, 1H, CH), 6.95 (d, <sup>3</sup>J<sub>HH</sub> = 9.1 Hz, 1H, C<sub>6</sub>H<sub>3</sub>), 7.98-7.02 (m, 4H, C<sub>6</sub>H<sub>3</sub>), 7.07 (d, <sup>3</sup>J<sub>HH</sub> = 7.6 Hz, 1H, C<sub>6</sub>H<sub>3</sub>), 7.23 (d, <sup>3</sup>J<sub>HH</sub> = 9.2 Hz, 1H, C<sub>6</sub>H<sub>3</sub>), 7.28 (d, <sup>3</sup>J<sub>HH</sub> = 7.6 Hz, 1H, C<sub>6</sub>H<sub>3</sub>), 7.31 (t, <sup>3</sup>J<sub>HH</sub> = 7.6 Hz, 2H, C<sub>6</sub>H<sub>3</sub>), 7.35 (d, <sup>3</sup>J<sub>HH</sub> = 8.0 Hz, 1H, C<sub>6</sub>H<sub>3</sub>), 7.39 (d, <sup>3</sup>J<sub>HH</sub> = 9.2 Hz, 1H, C<sub>6</sub>H<sub>3</sub>). <sup>13</sup>C{<sup>1</sup>H} NMR (125 MHz, C<sub>6</sub>D<sub>6</sub>, 298 K) δ = 10.2 (CH<sub>3</sub>), 24.3, 24.5, 24.7, 24.8, 25.1, 25.2, 25.3, 25.5, 25.6, 25.7, 25.8, 26.2, 26.4, 26.5 (CH(CH<sub>3</sub>)<sub>2</sub>), 27.0, 27.9, 28.1, 28.3, 28.4, 28.8, 29.0, 29.1, 29.4, 29.8 (CH(CH<sub>3</sub>)<sub>2</sub>), 51.7 (CC), 98.5, 100.2 (CH), 123.4, 123.7, 123.8, 123.9, 124.0, 125.7, 125.9, 126.0, 126.2, 126.9, 127.0, 142.8, 143.7, 145.0, 146.1, 146.2, 146.4, 146.5, 146.6, 146.9, 147.0, 147.1, 147.2, 161.5 (dd, J<sub>CP</sub> = 6.23 and 129.85 Hz, PCPC), 168.6, 169.1, 169.8, 170.2 (C<sub>6</sub>H<sub>3</sub>), 231.5 (dd, J<sub>CP</sub> = 97.10 and 110.96 Hz, PCPC). <sup>31</sup>P{<sup>1</sup>H} (121 MHz, C<sub>6</sub>D<sub>6</sub>, 298 K) δ = 153.34 (d, <sup>2</sup>J<sub>PP</sub> = 22.1 Hz, PCP), 73.94 (d, <sup>2</sup>J<sub>PP</sub> = 20.1 Hz, PCP). ATR-IR: ν 2958, 2925, 2865, 1733, 1551, 1525, 1459, 1434, 1391, 1315, 1253, 1173, 1098, 1018, 936, 853, 795, 761, 685, 639, 557 cm<sup>-1</sup>.

### Synthesis of compound 5.

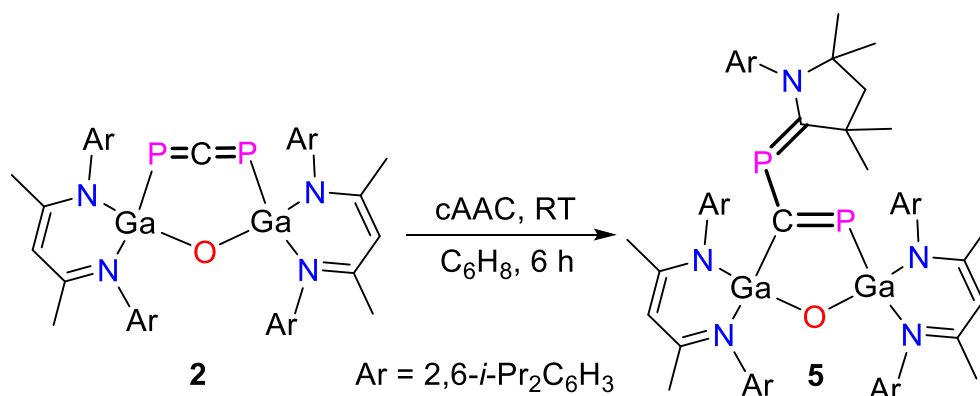

To a toluene (5 mL) solution of **2** (100 mg, 0.094 mmol), cAAC·LiOTf (42 mg, 0.094 mmol) was added in one portion at ambient temperature and the resulting reaction mixture was stirred for 6 hours. During this time the olive color turned to wine-red. All volatiles were then removed in *vacuo* and the residue was dissolved in *n*-hexane (5 mL) and filtered through a plug of celite. After drying the filtrate in *vacuo*, compound **5** was isolated as a wine-red solid in 93% (118 mg) yield. M.p. 143 °C (dec.). Anal. calcd. (%) for C<sub>79</sub>H<sub>113</sub>Ga<sub>2</sub>N<sub>5</sub>OP<sub>2</sub> (1350.17): C, 70.28; H, 8.44; N, 5.19. Found: C, 70.31; H, 8.45; N, 5.19. <sup>1</sup>H NMR (400 MHz, C<sub>6</sub>D<sub>6</sub>, 298 K) δ = 0.78 (d, <sup>3</sup>J<sub>HH</sub> = 6.8 Hz, 6H, CH(CH<sub>3</sub>)<sub>2</sub>), 1.12 (pst, <sup>3</sup>J<sub>HH</sub> = 6.8 Hz, 12H, CH(CH<sub>3</sub>)<sub>2</sub>), 1.18 (d, <sup>3</sup>J<sub>HH</sub> = 6.8 Hz, 12H, CH(CH<sub>3</sub>)<sub>2</sub>), 1.21 (s, 6H, CH<sub>3</sub>), 1.23 (d, <sup>3</sup>J<sub>HH</sub> = 6.8 Hz, 6H, CH(CH<sub>3</sub>)<sub>2</sub>), 1.30 (d, <sup>3</sup>J<sub>HH</sub> = 6.8 Hz, 6H, CH(CH<sub>3</sub>)<sub>2</sub>), 1.37 (d, <sup>3</sup>J<sub>HH</sub> = 6.8 Hz, 6H, CH(CH<sub>3</sub>)<sub>2</sub>), 1.42 (s, 6H, CCH<sub>3</sub>), 1.47 (s, 6H, CCH<sub>3</sub>), 1.48 (d, <sup>3</sup>J<sub>HH</sub> = 6.8 Hz, 6H, CH(CH<sub>3</sub>)<sub>2</sub>), 1.60 (d, <sup>3</sup>J<sub>HH</sub> = 6.8 Hz, 6H, CH(CH<sub>3</sub>)<sub>2</sub>), 2.17 (s, 3H, CH<sub>3</sub>), 2.19 (s, 3H, CH<sub>3</sub>), 2.97 (sept, <sup>3</sup>J<sub>HH</sub> = 6.8

Hz, 2H,  $CH(CH_3)_2$ ), 3.22 (sept,  $^3J_{HH} = 6.8$  Hz, 4H,  $CH(CH_3)_2$ ), 3.50 (sept,  $^3J_{HH} = 6.8$  Hz, 2H,  $CH(CH_3)_2$ ), 3.69 (sept,  $^3J_{HH} = 6.8$  Hz, 2H,  $CH(CH_3)_2$ ), 4.84 (s, 1H, CH), 4.88 (s, 1H, CH), 6.96 (d,  $^3J_{HH} = 7.6$  Hz, 2H,  $C_6H_3$ ), 7.01 (d,  $^3J_{HH} = 7.6$  Hz, 2H,  $C_6H_3$ ), 7.05–7.08 (m, 4H,  $C_6H_3$ ), 7.12–7.14 (m, 3H,  $C_6H_3$ ), 7.18–7.22 (m, 5H,  $C_6H_3$ ).  $^{13}C\{^1H\}$  NMR (100 MHz,  $C_6D_6$ , 298 K)  $\delta = 14.4$  ( $CH_3$ ), 21.4, 24.1, 24.8, 25.0, 25.2, 25.7, 26.4 ( $CH(CH_3)_2$ ), 27.4, 28.4, 28.8, 29.0, 29.2, 30.6, 30.8 ( $CH(CH_3)_2$ ), 50.7, 50.8, 56.8, 68.9 (CC), 96.4, 99.8 (CH), 124.4, 124.6, 124.8, 125.7, 126.3, 126.4, 128.6, 129.3, 137.6, 137.9, 143.0, 143.2, 143.4, 143.6, 144.3, 144.8, 147.9, 169.4, 169.7 ( $C_6H_3$ ), 200.8 (dd,  $J_{CP} = 12.54$  and 112.83 Hz, PCPC), 249.3 (dd,  $J_{CP} = 113.34$  and 121.01 Hz, PCPC).  $^{31}P\{^1H\}$  (121 MHz,  $C_6D_6$ , 298 K)  $\delta = 434.01$  (d,  $^2J_{PP} = 53.47$  Hz, PCP), 143.46 (d,  $^2J_{PP} = 52.74$  Hz, PCP). ATR-IR:  $\nu$  2959, 2929, 2866, 1623, 1549, 1526, 1437, 1384, 1363, 1317, 1257, 1199, 1177, 1141, 1098, 1019, 934, 864, 796, 757, 670, 620  $cm^{-1}$ .

### Synthesis of compound 6.

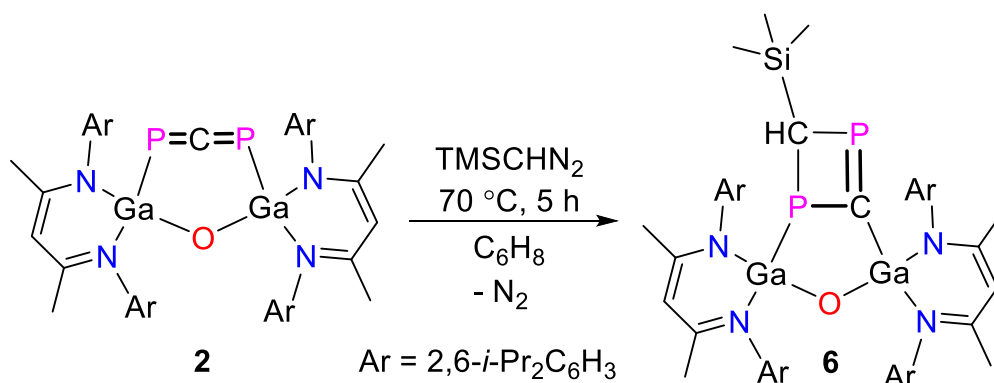

To a toluene (5 mL) solution of **2** (100 mg, 0.094 mmol), TMSCHN<sub>2</sub> (157  $\mu$ L, 0.094 mmol, 0.6 M in *n*-hexane) was added in one portion at ambient temperature and the resulting mixture was then heated to 70 °C for 3 hours. During this time the olive color turned to orange. All volatiles were then removed in *vacuo* to yield **6** as an orange solid. Yield: 93% (100 mg). M.p. 137 °C (dec.). Single crystals suitable for X-ray diffraction were grown by storing a saturated *n*-hexane solution of **6** at ambient temperature for 12 hours. Anal. calcd. (%) for C<sub>63</sub>H<sub>92</sub>Ga<sub>2</sub>N<sub>4</sub>OP<sub>2</sub>Si (1150.91): C, 65.75; H, 8.06; N, 4.87. Found: C, 65.73; H, 8.01; N, 4.84.  $^1H$  NMR (400 MHz,  $C_6D_6$ , 298 K)  $\delta = -0.02$  (s, 9H, Si(CH<sub>3</sub>)<sub>3</sub>), 0.74 (d,  $^3J_{HH} = 6.8$  Hz, 3H, CH(CH<sub>3</sub>)<sub>2</sub>), 0.83 (br, 1H, CHSi(CH<sub>3</sub>)<sub>3</sub>), 0.90 (pst,  $^3J_{HH} = 6.8$  Hz, 6H, CH(CH<sub>3</sub>)<sub>2</sub>), 0.92 (d,  $^3J_{HH} = 6.8$  Hz, 3H, CH(CH<sub>3</sub>)<sub>2</sub>), 0.93 (d,  $^3J_{HH} = 6.8$  Hz, 3H, CH(CH<sub>3</sub>)<sub>2</sub>), 1.01 (d,  $^3J_{HH} = 6.8$  Hz, 3H, CH(CH<sub>3</sub>)<sub>2</sub>), 1.07 (d,  $^3J_{HH} = 6.8$  Hz, 3H, CH(CH<sub>3</sub>)<sub>2</sub>), 1.11 (d,  $^3J_{HH} = 6.8$  Hz, 3H, CH(CH<sub>3</sub>)<sub>2</sub>), 1.13 (d,  $^3J_{HH} = 6.8$  Hz, 3H, CH(CH<sub>3</sub>)<sub>2</sub>), 1.16 (d,  $^3J_{HH} = 6.8$  Hz, 6H, CH(CH<sub>3</sub>)<sub>2</sub>), 1.24 (br, 6H, CCH<sub>3</sub>), 1.29 (d,  $^3J_{HH} = 6.8$  Hz, 3H, CH(CH<sub>3</sub>)<sub>2</sub>), 1.38 (d,  $^3J_{HH} = 6.8$  Hz, 3H, CH(CH<sub>3</sub>)<sub>2</sub>), 1.40 (s, 3H, CCH<sub>3</sub>), 1.41 (d,  $^3J_{HH} = 6.8$  Hz, 3H, CH(CH<sub>3</sub>)<sub>2</sub>), 1.43 (d,  $^3J_{HH} = 6.8$  Hz, 3H, CH(CH<sub>3</sub>)<sub>2</sub>), 1.44 (s, 3H, CCH<sub>3</sub>), 1.49 (s, 3H, CCH<sub>3</sub>), 1.51 (s, 3H, CCH<sub>3</sub>), 1.60 (d,  $^3J_{HH} = 6.5$  Hz, 3H, CH(CH<sub>3</sub>)<sub>2</sub>), 1.63 (d,

$^3J_{\text{HH}} = 6.5$  Hz, 3H, CH(CH<sub>3</sub>)<sub>2</sub>), 1.65 (d,  $^3J_{\text{HH}} = 6.5$  Hz, 3H, CH(CH<sub>3</sub>)<sub>2</sub>), 2.77 (sept,  $^3J_{\text{HH}} = 6.7$  Hz, 1H, CH(CH<sub>3</sub>)<sub>2</sub>), 3.96 (sept,  $^3J_{\text{HH}} = 6.7$  Hz, 1H, CH(CH<sub>3</sub>)<sub>2</sub>), 3.02 (sept,  $^3J_{\text{HH}} = 6.7$  Hz, 1H, CH(CH<sub>3</sub>)<sub>2</sub>), 3.13 (sept,  $^3J_{\text{HH}} = 6.7$  Hz, 1H, CH(CH<sub>3</sub>)<sub>2</sub>), 3.27 (sept,  $^3J_{\text{HH}} = 6.7$  Hz, 1H, CH(CH<sub>3</sub>)<sub>2</sub>), 3.37 (sept,  $^3J_{\text{HH}} = 6.7$  Hz, 1H, CH(CH<sub>3</sub>)<sub>2</sub>), 4.27 (sept,  $^3J_{\text{HH}} = 6.7$  Hz, 1H, CH(CH<sub>3</sub>)<sub>2</sub>), 4.41 (sept,  $^3J_{\text{HH}} = 6.7$  Hz, 1H, CH(CH<sub>3</sub>)<sub>2</sub>), 4.82 (s, 1H, CH), 4.83 (s, 1H, CH), 6.98 (d,  $^3J_{\text{HH}} = 5.0$  Hz, 1H, C<sub>6</sub>H<sub>3</sub>), 7.10–7.13 (m, 5H, C<sub>6</sub>H<sub>3</sub>), 7.17–7.27 (m, 5H, C<sub>6</sub>H<sub>3</sub>), 7.28–7.32 (m, 1H, C<sub>6</sub>H<sub>3</sub>). <sup>13</sup>C {<sup>1</sup>H} NMR (100 MHz, C<sub>6</sub>D<sub>6</sub>, 298 K)  $\delta = -1.4, 1.4, 14.4$  (CH<sub>3</sub>), 23.1, 23.9, 24.3, 24.4, 24.5, 24.7, 25.2, 25.3, 25.5, 266, 26.9 (CH(CH<sub>3</sub>)<sub>2</sub>), 28.0, 28.1, 28.9, 29.1, 29.3, 29.5 (CH(CH<sub>3</sub>)<sub>2</sub>), 32.0 (CCH), 35.1 (dd,  $J_{\text{CP}} = 28.05$  and 36.59 Hz, PCPCH), 97.2, 97.3 (CH), 123.6, 123.8, 124.2, 124.3, 124.4, 124.5, 125.4, 125.7, 127.2, 127.3, 142.4, 143.3, 143.5, 143.8, 144.0, 144.1, 144.3, 144.5, 144.6, 145.3, 46.7, 146.8, 168.4, 169.0, 169.8, 171.0 (C<sub>6</sub>H<sub>3</sub>), 244.94 (dd,  $J_{\text{CP}} = 51.55$  and 77.77 Hz, PCPC). <sup>31</sup>P {<sup>1</sup>H} (161 MHz, C<sub>6</sub>D<sub>6</sub>, 298 K)  $\delta = 386.48$  (d,  $^2J_{\text{PP}} = 96.8$  Hz, PP), 89.30 (d,  $^2J_{\text{PP}} = 96.8$  Hz, PP). ATR-IR:  $\nu$  2957, 2922, 2866, 1528, 1437, 1389, 1315, 1257, 1176, 1098, 1019, 934, 854, 796, 759, 711, 637, 527 cm<sup>-1</sup>.



## 2. Spectroscopic Characterization

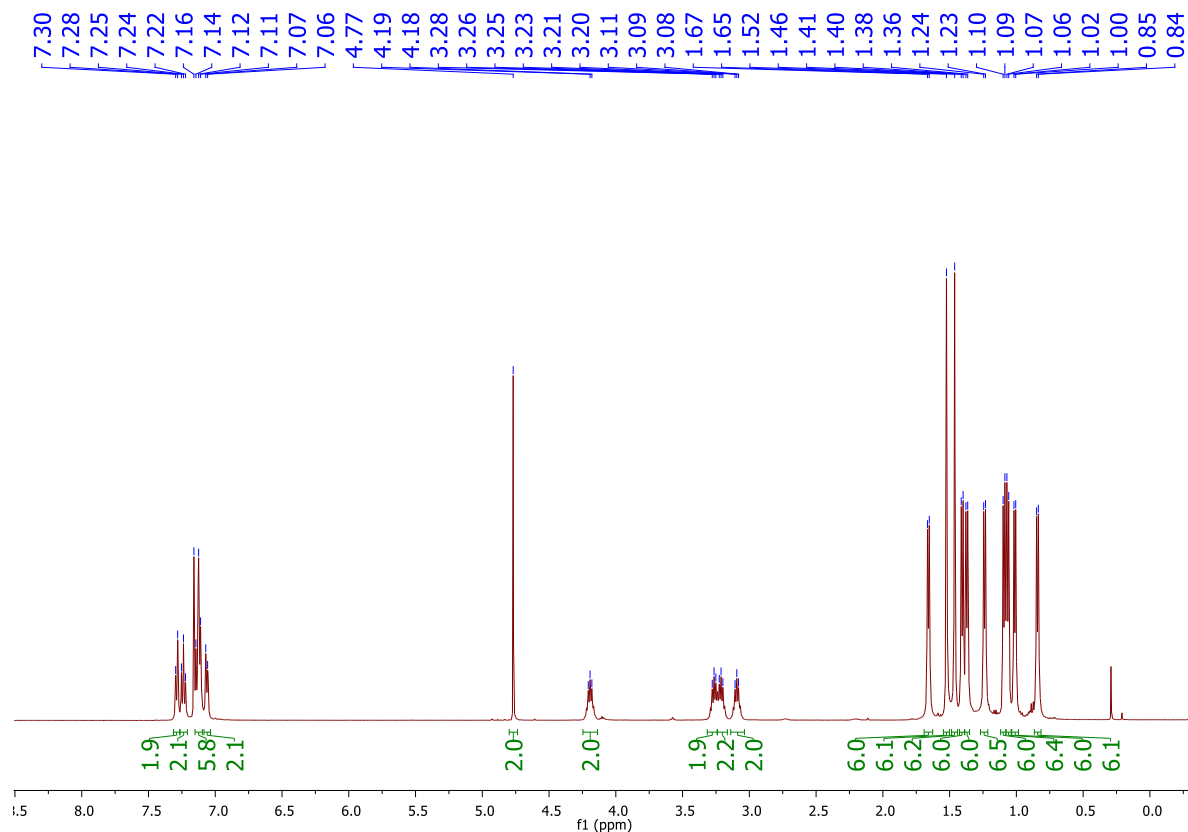

Figure S1. <sup>1</sup>H NMR (300 MHz, C<sub>6</sub>D<sub>6</sub>, 298 K) spectrum of compound **2**.

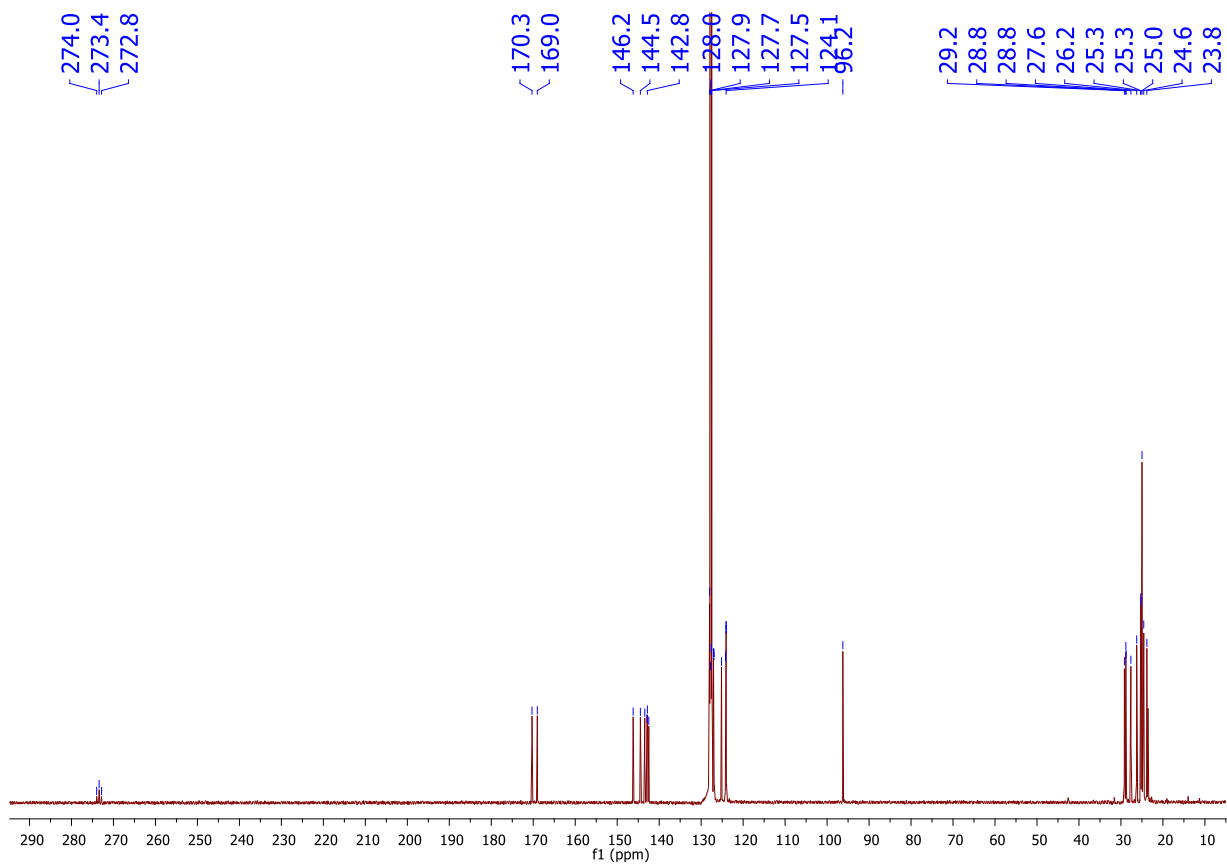

Figure S2. <sup>13</sup>C{<sup>1</sup>H} NMR (75 MHz, C<sub>6</sub>D<sub>6</sub>, 298 K) spectrum of compound **2**.

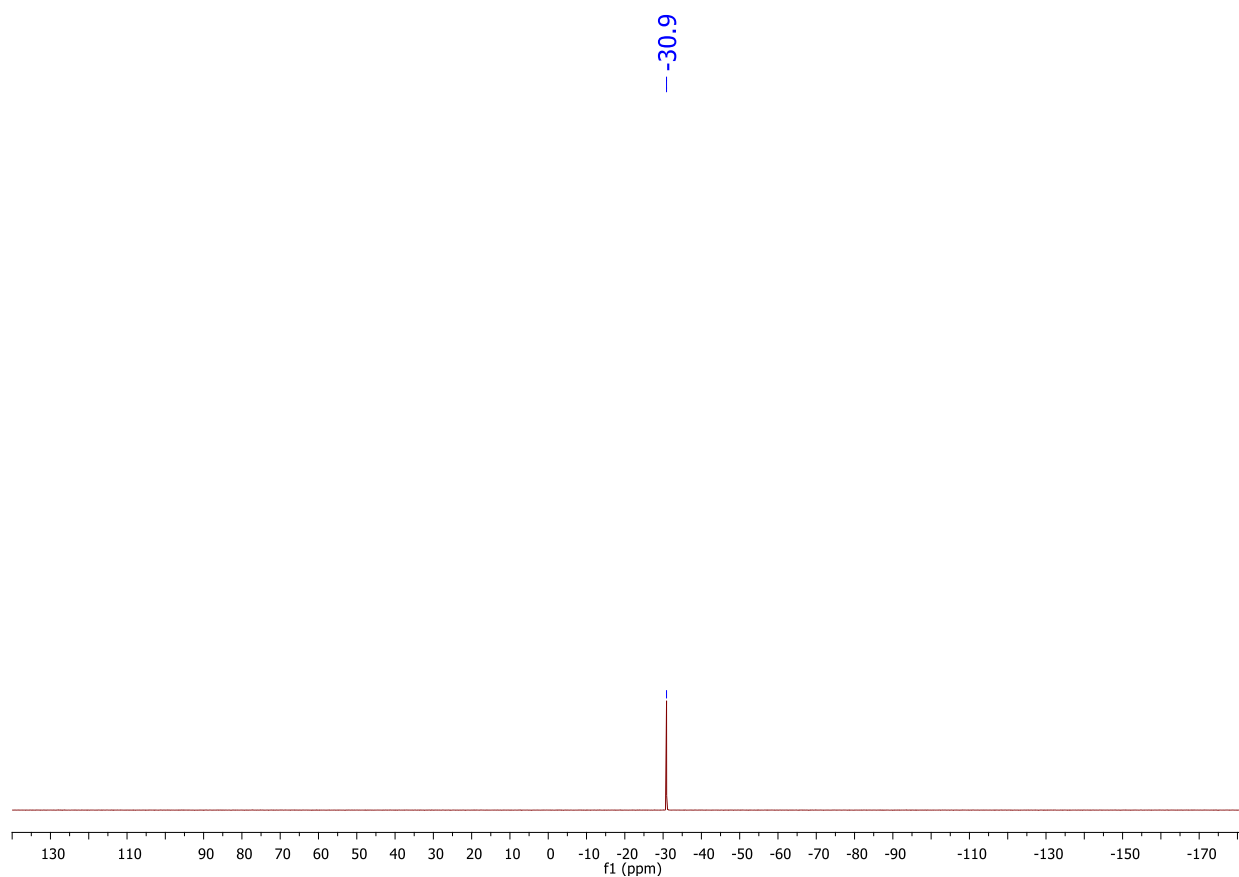

**Figure S3.**  $^{31}\text{P}\{^1\text{H}\}$  NMR (121 MHz,  $\text{C}_6\text{D}_6$ , 298 K) spectrum of compound **2**.

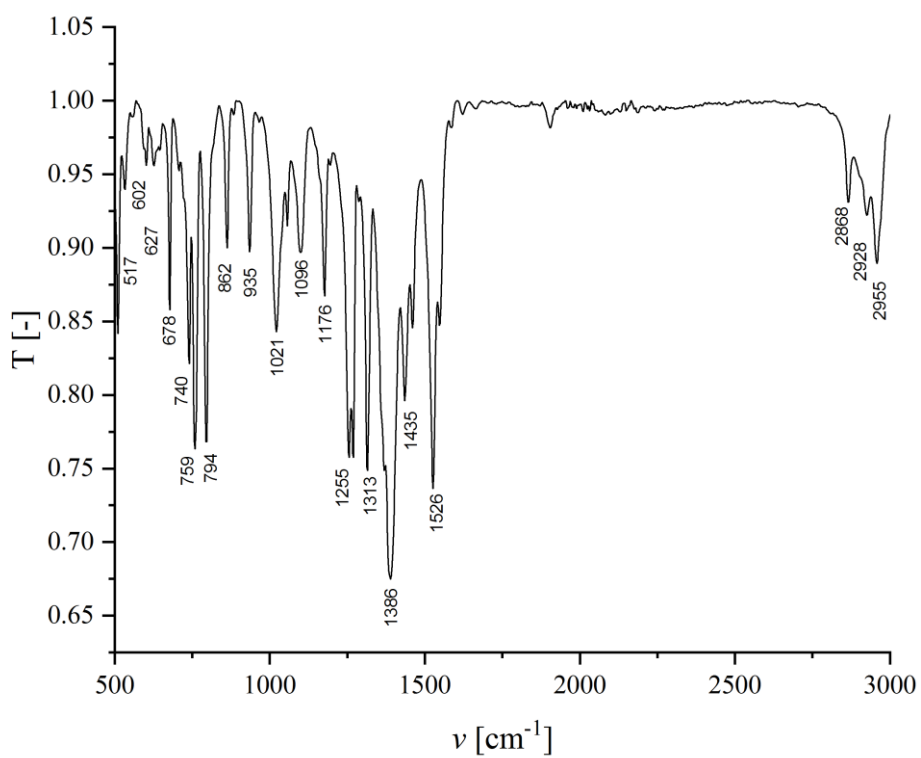

**Figure S4.** ATR-IR spectrum of compound **2**.

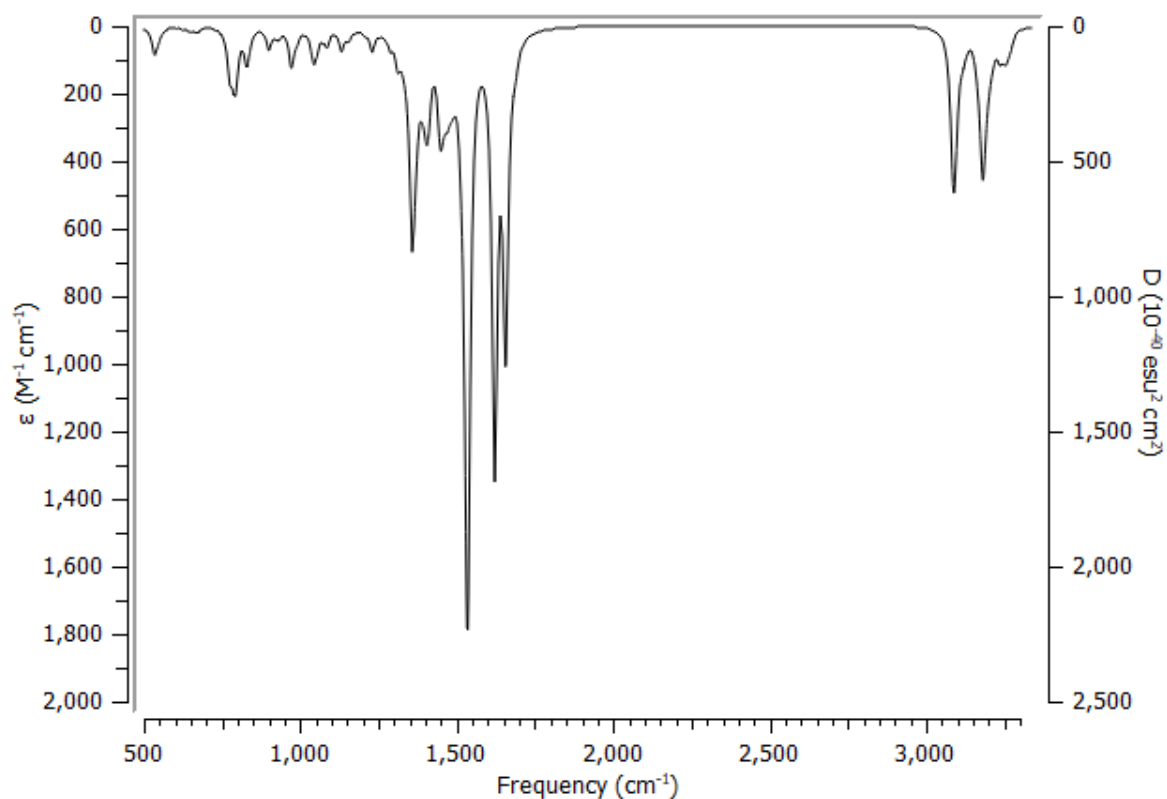

**Figure S5.** IR spectrum of compound **2** simulated by means of PBE0-D3BJ/def2-SVP. The asymmetric stretching frequency for the 1,3-diphosphaallene unit is calculated to a value of  $1347\text{ cm}^{-1}$ .

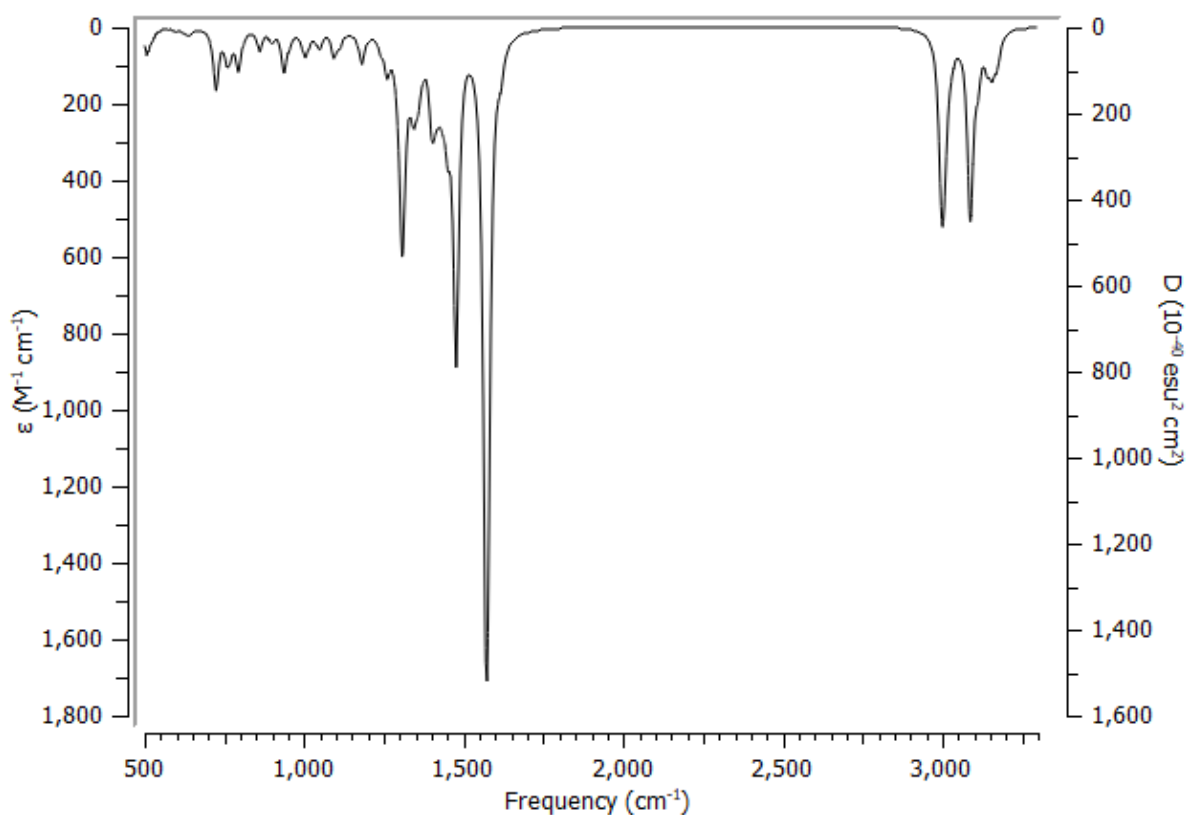

**Figure S6.** IR spectrum of compound **2** simulated by means of PBE-D3BJ/def2-SVP. The asymmetric stretching frequency for the 1,3-diphosphaallene unit is calculated to a value of  $1297\text{ cm}^{-1}$ .

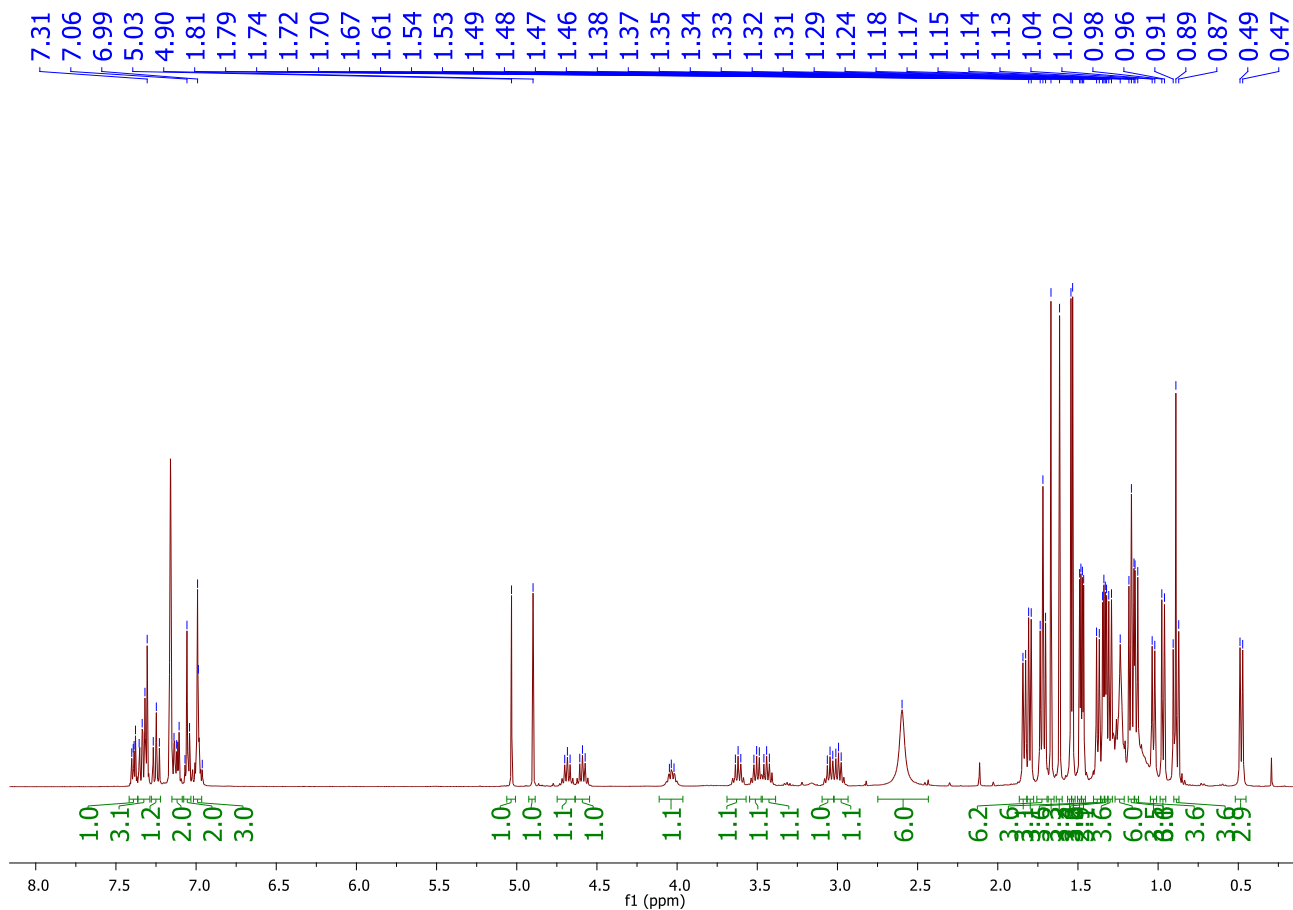

Figure S7.  $^1\text{H}$  NMR (400 MHz,  $\text{C}_6\text{D}_6$ , 298 K) spectrum of compound **3**.

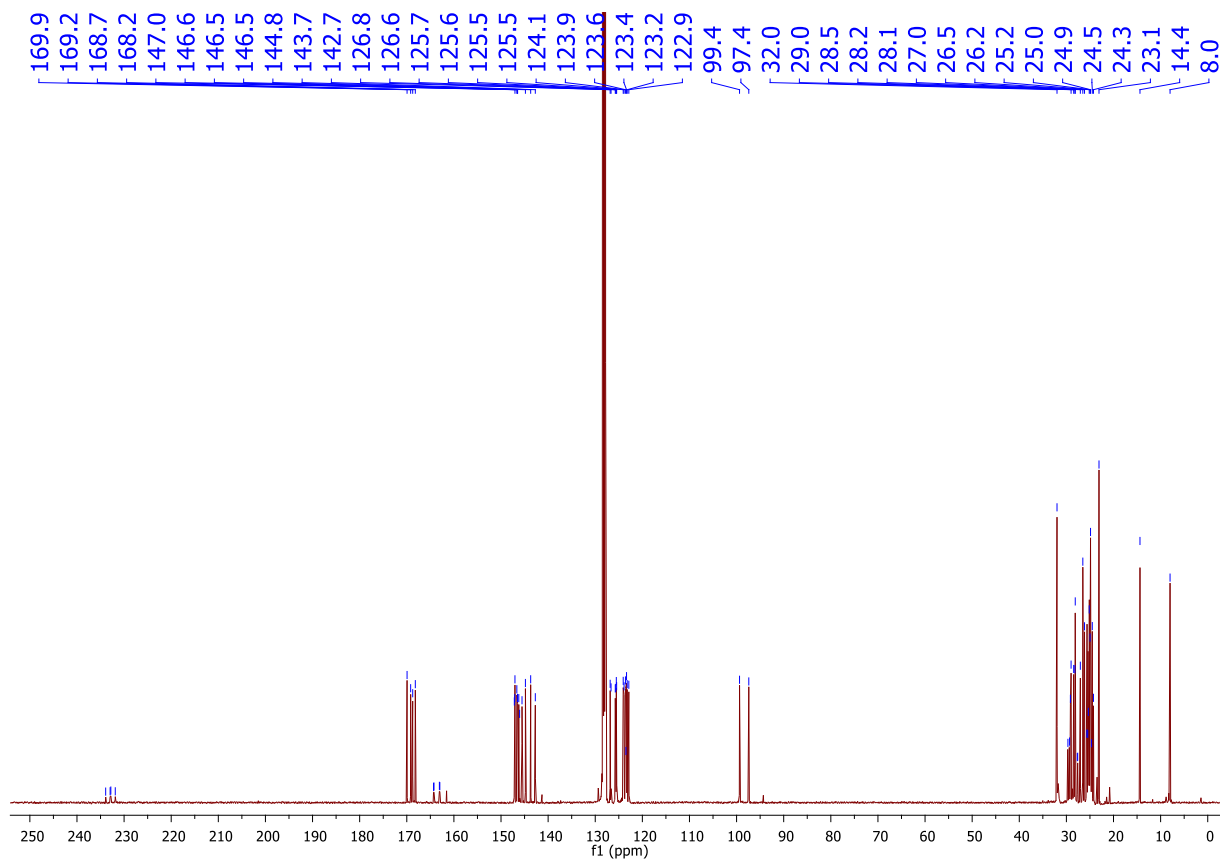

Figure S8.  $^{13}\text{C}\{^1\text{H}\}$  NMR (100 MHz,  $\text{C}_6\text{D}_6$ , 298 K) spectrum of compound **3**.

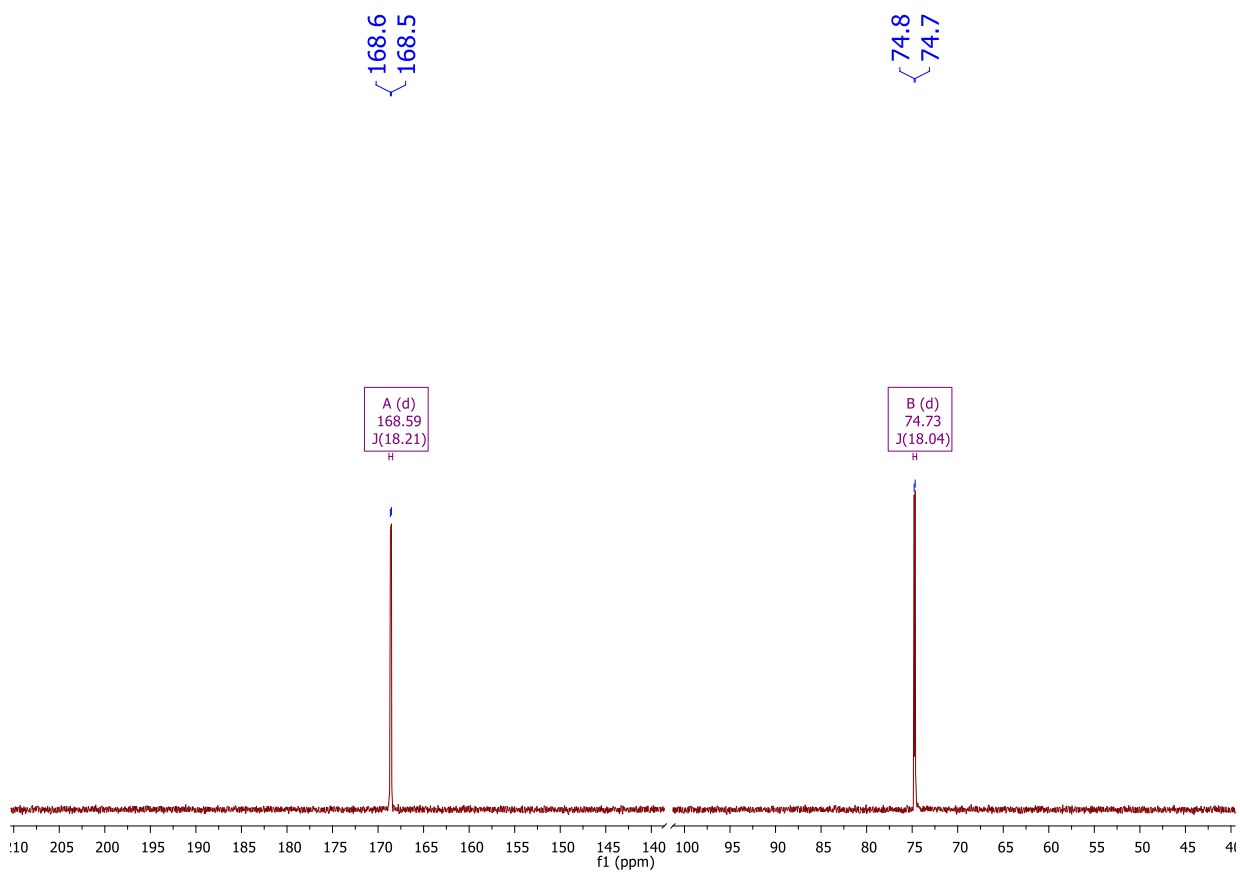

**Figure S9.**  $^{31}\text{P}\{^1\text{H}\}$  NMR (161 MHz,  $\text{C}_6\text{D}_6$ , 298 K) spectrum of compound **3**.

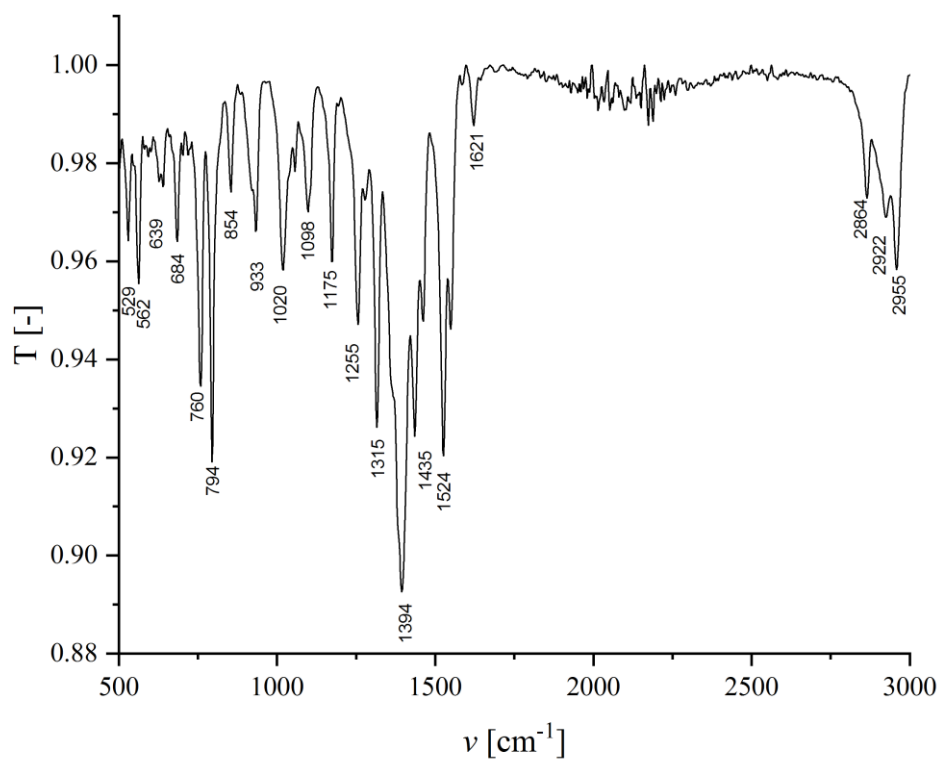

**Figure S10.** ATR-IR spectrum of compound **3**.

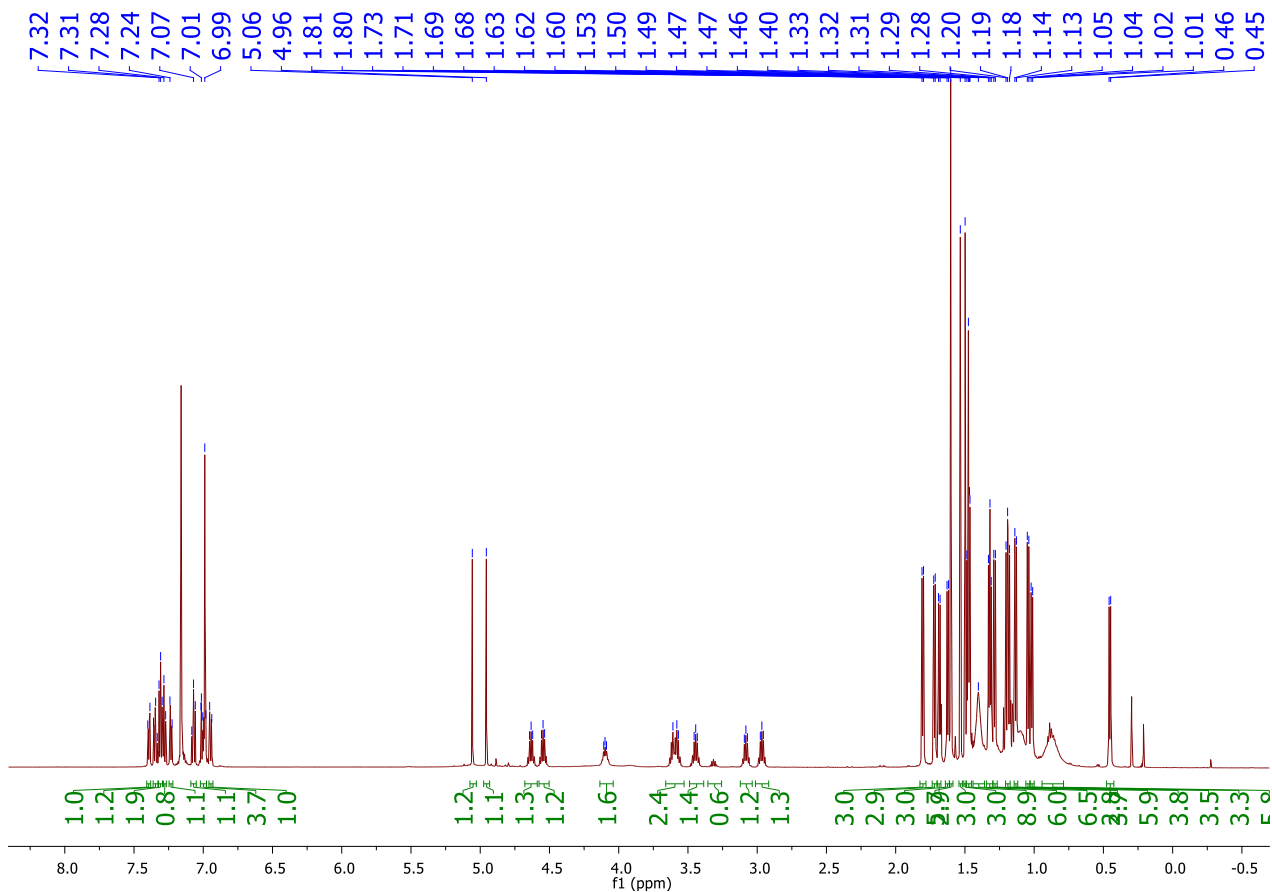

**Figure S11.**  $^1\text{H}$  NMR (400 MHz,  $\text{C}_6\text{D}_6$ , 298 K) spectrum of compound **4**.

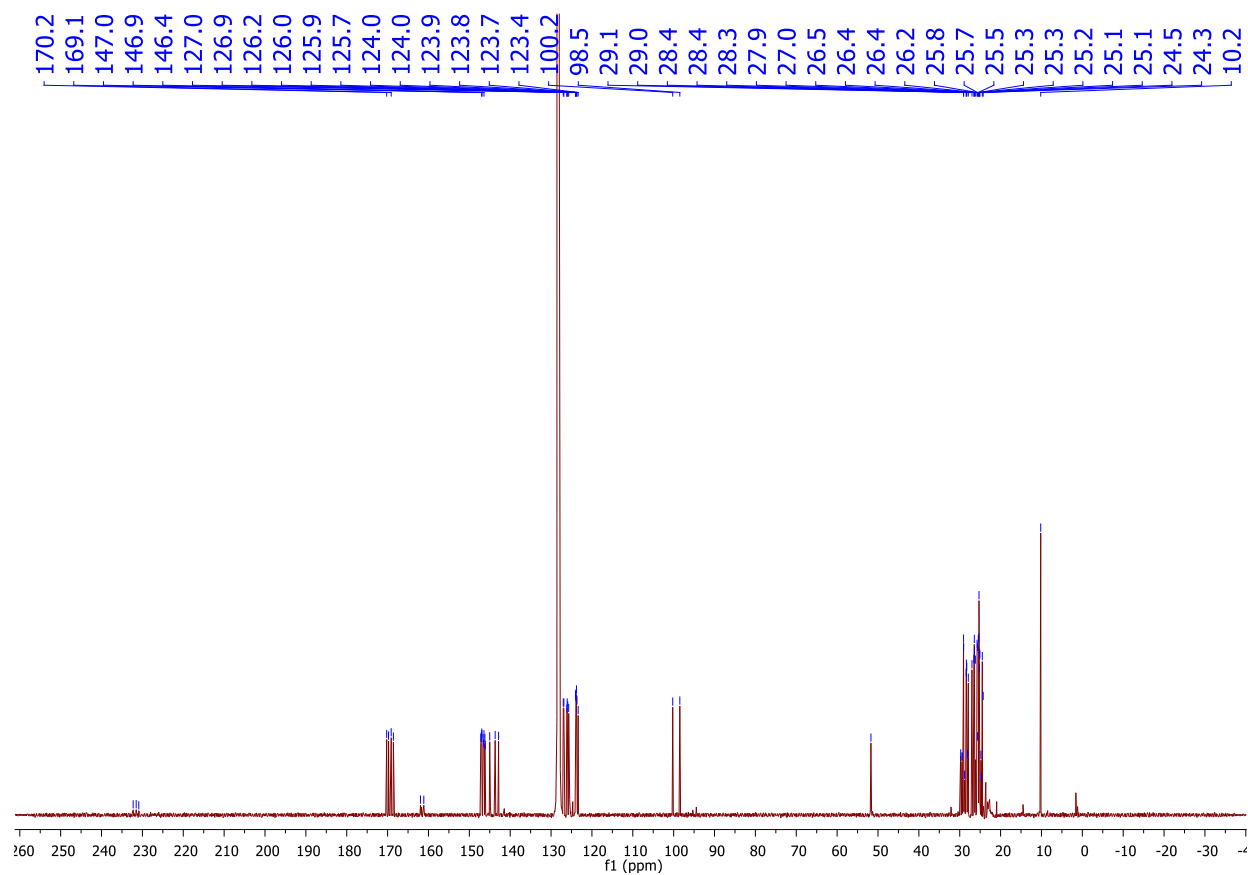

**Figure S12.**  $^{13}\text{C}\{^1\text{H}\}$  NMR (100 MHz,  $\text{C}_6\text{D}_6$ , 298 K) spectrum of compound **4**.

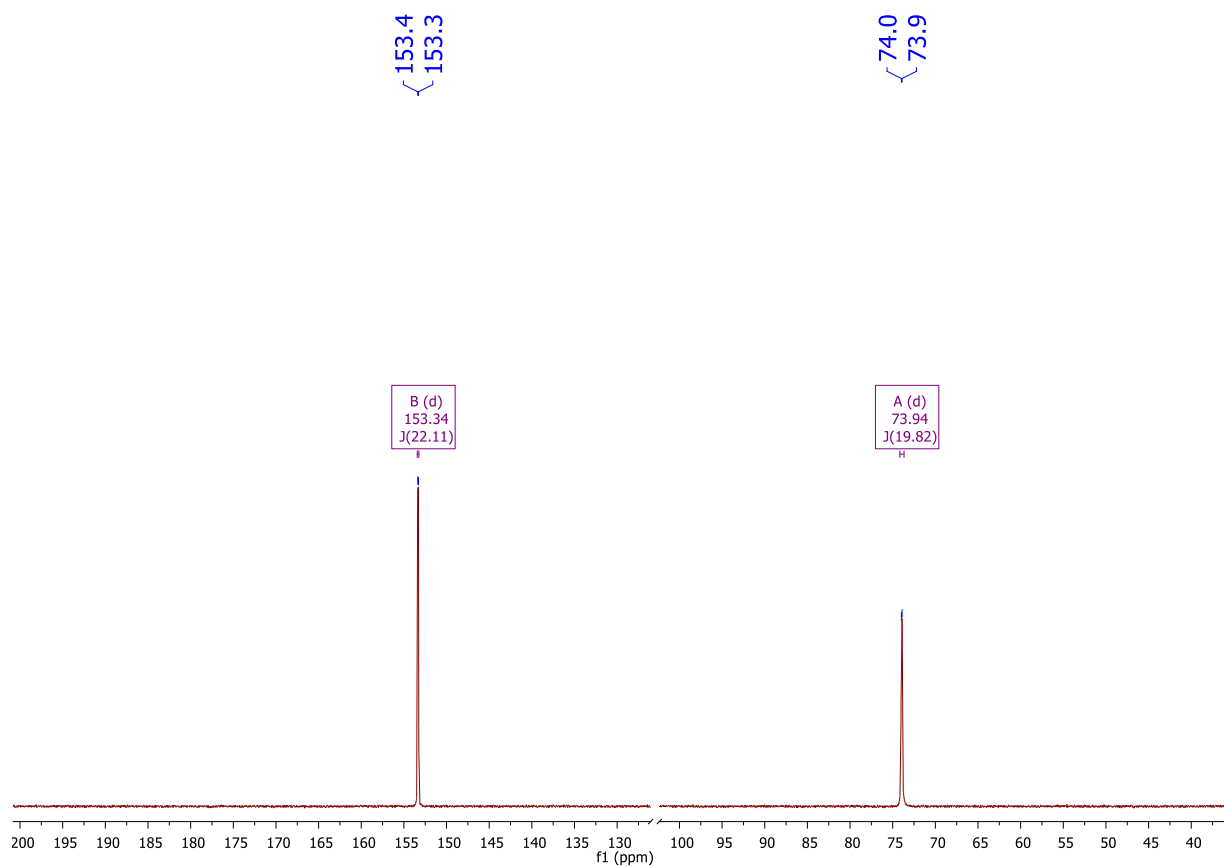

**Figure S13.**  $^{31}\text{P}\{^1\text{H}\}$  NMR (161 MHz,  $\text{C}_6\text{D}_6$ , 298 K) spectrum of compound **4**.

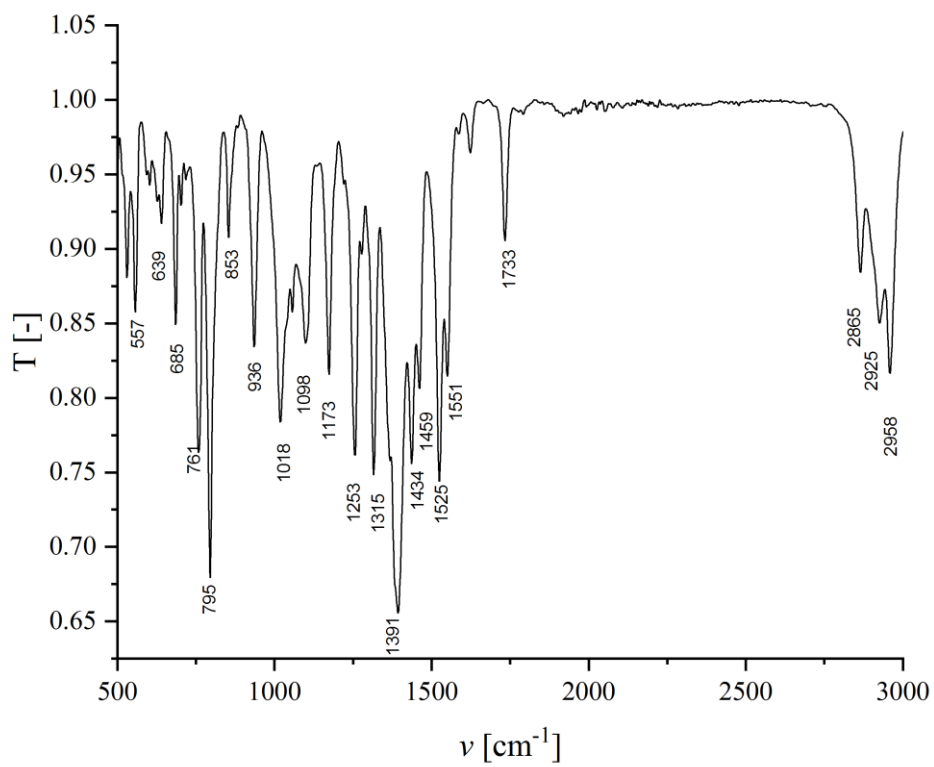

**Figure S14.** ATR-IR spectrum of compound **4**.

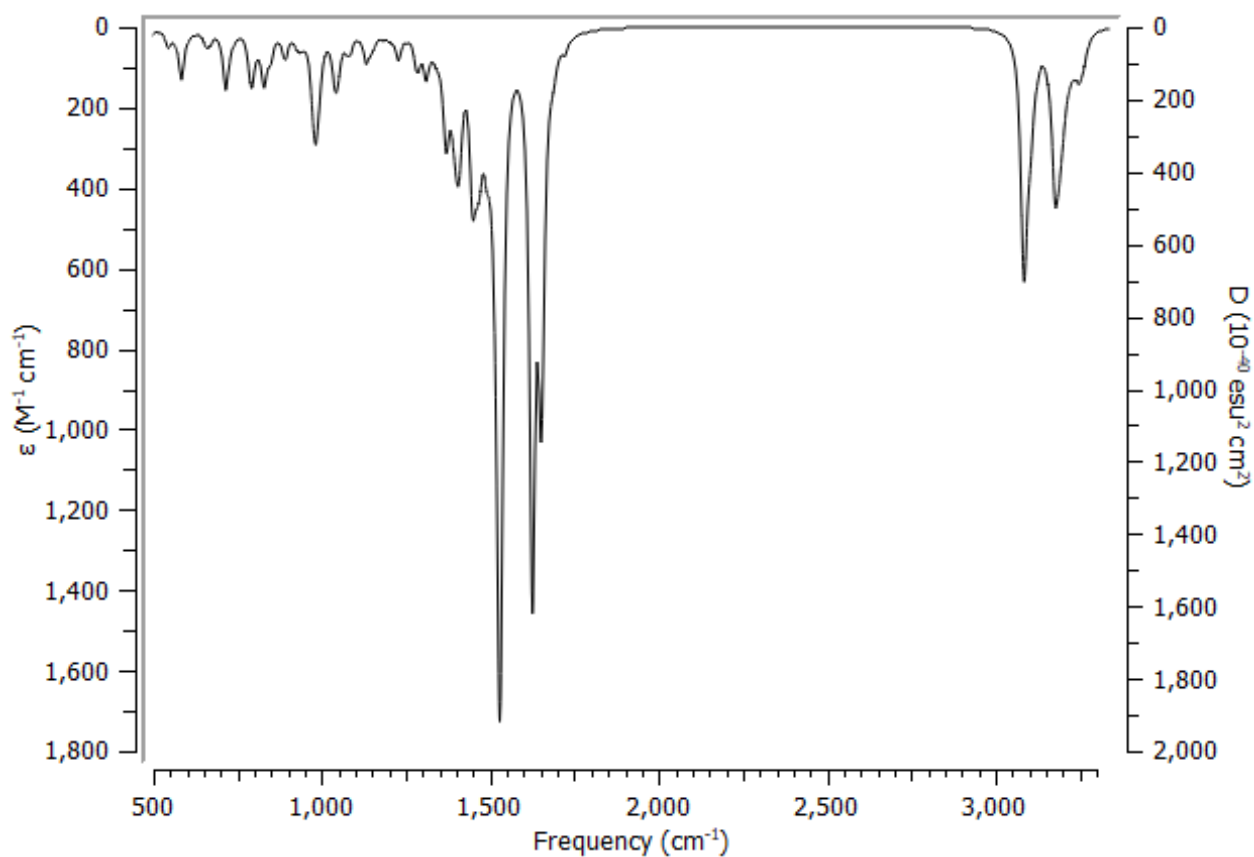

**Figure S15.** IR spectrum of compound **4** simulated by means of PBE0-D3BJ/def2-SVP.

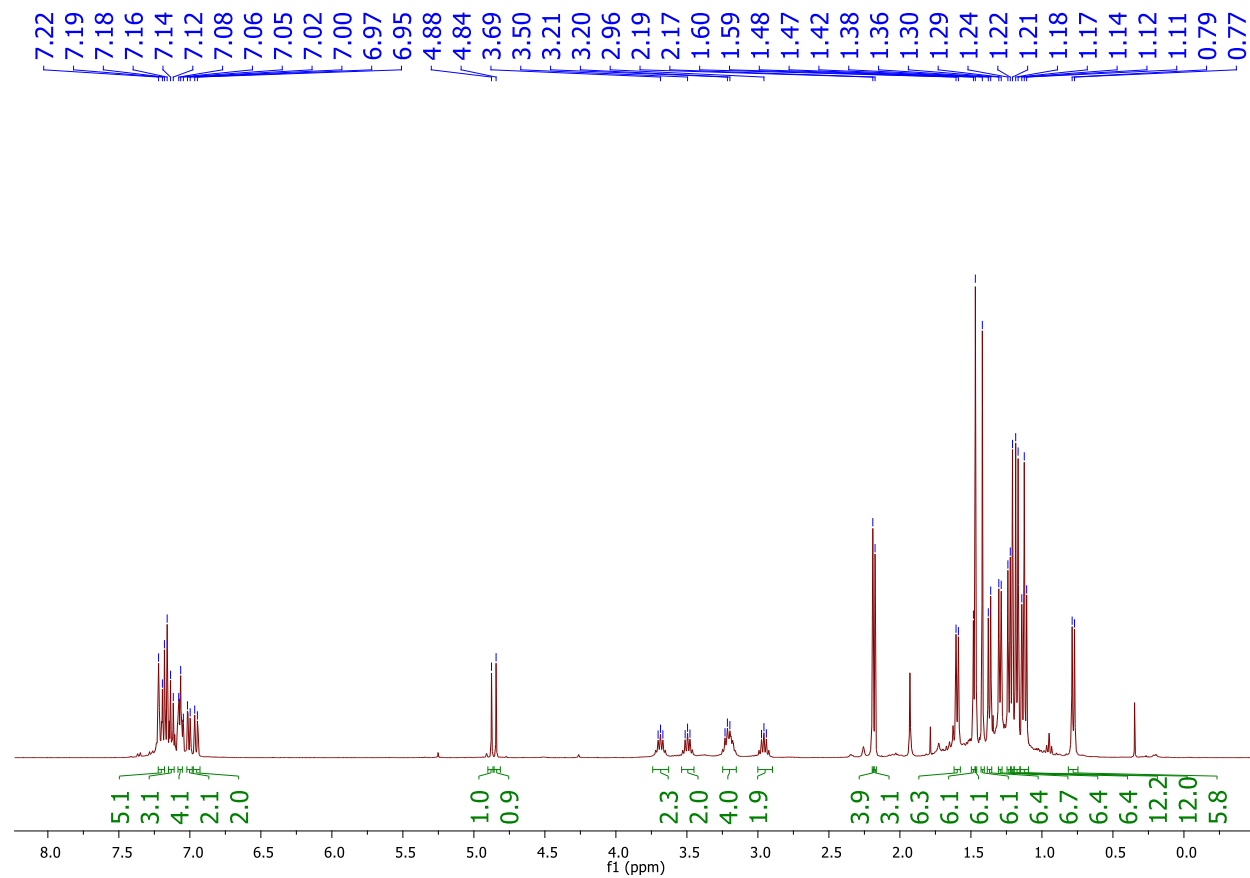

**Figure S16.**  $^1\text{H}$  NMR (400 MHz,  $\text{C}_6\text{D}_6$ , 298 K) spectrum of compound **5**.



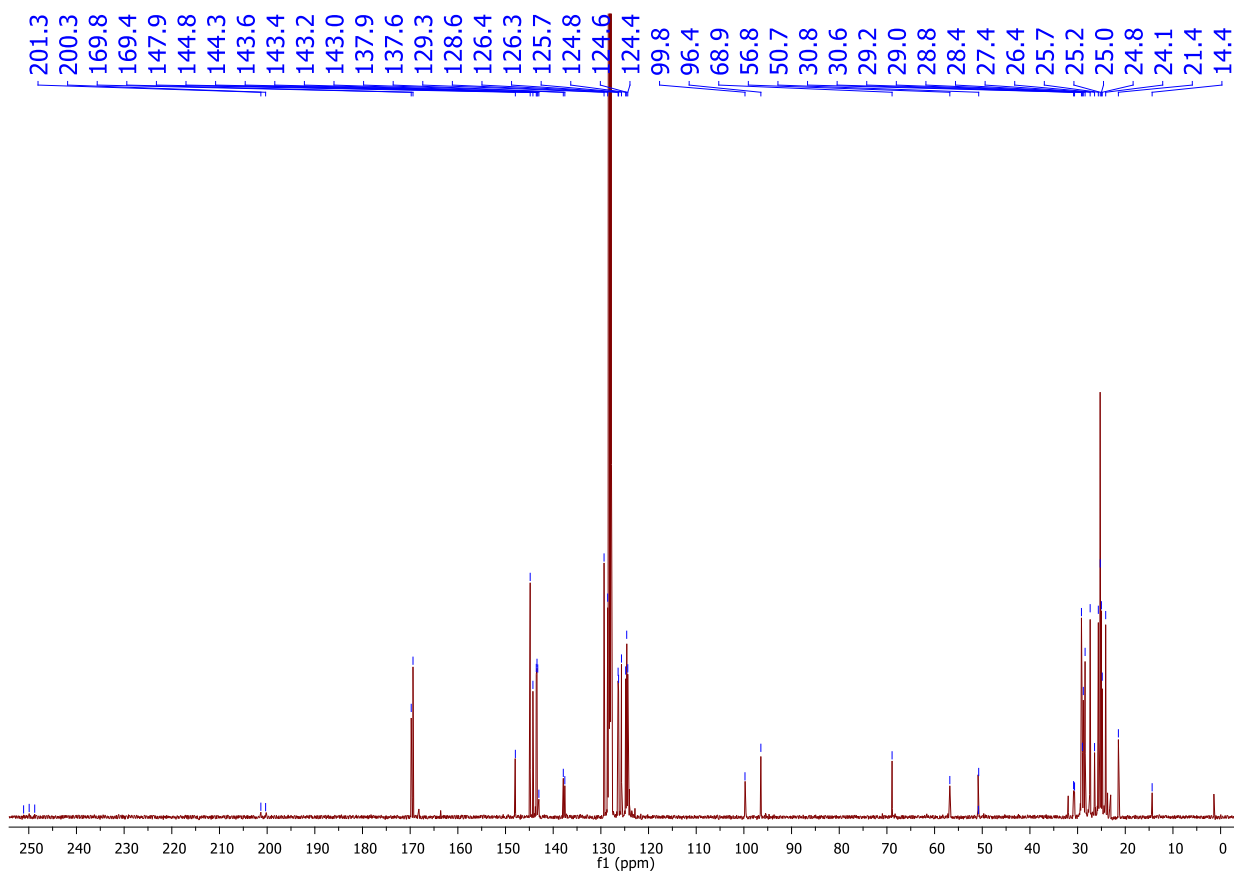

**Figure S17.**  $^{13}\text{C}\{^1\text{H}\}$  NMR (100 MHz,  $\text{C}_6\text{D}_6$ , 298 K) spectrum of compound **5**.

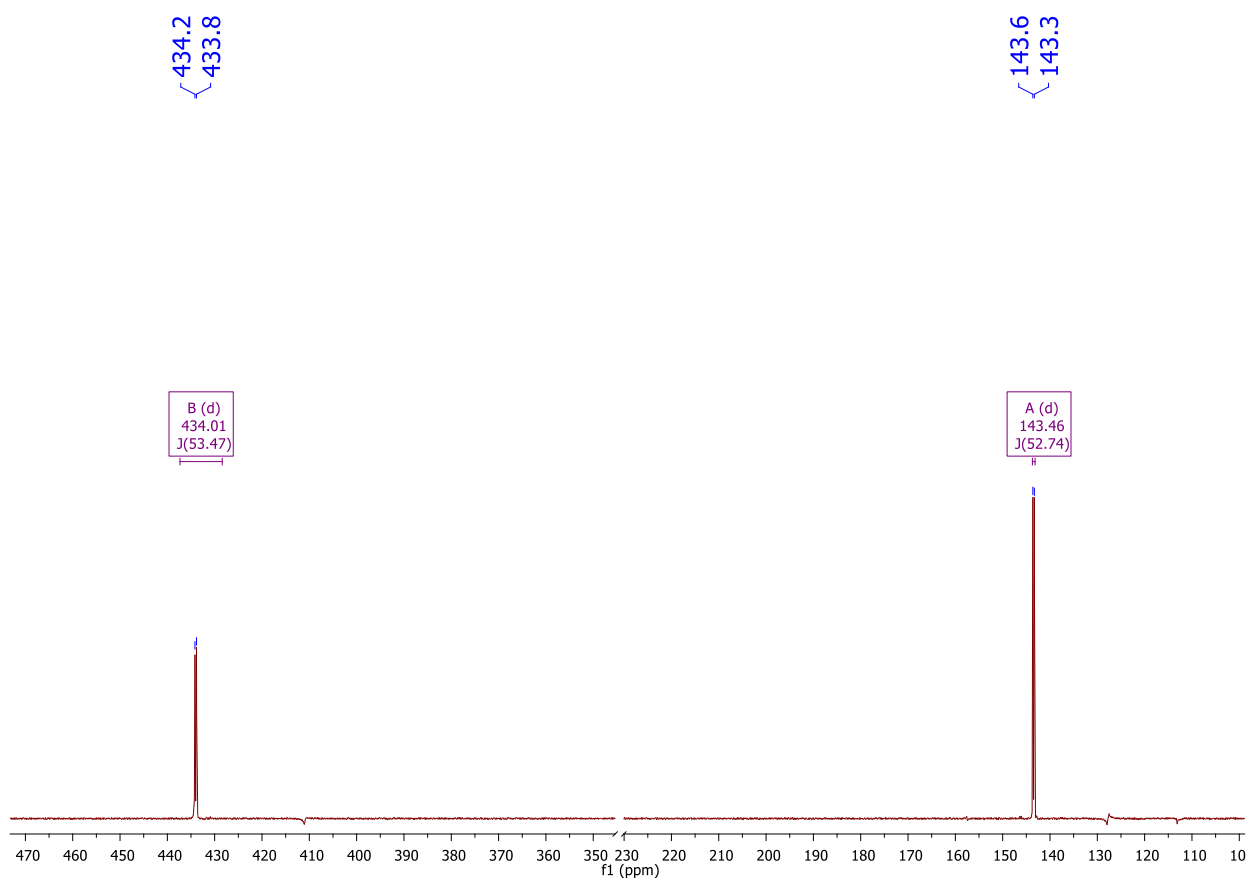

**Figure S18.**  $^{31}\text{P}\{^1\text{H}\}$  NMR (161 MHz,  $\text{C}_6\text{D}_6$ , 298 K) spectrum of compound **5**.

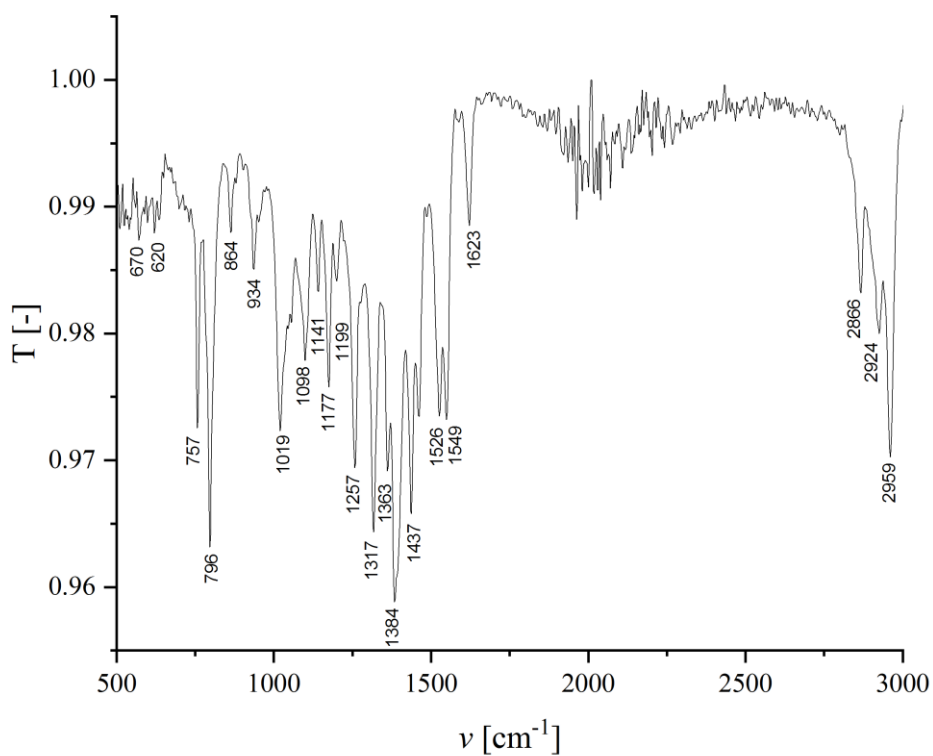

**Figure S19.** ATR-IR spectrum of compound **5**.

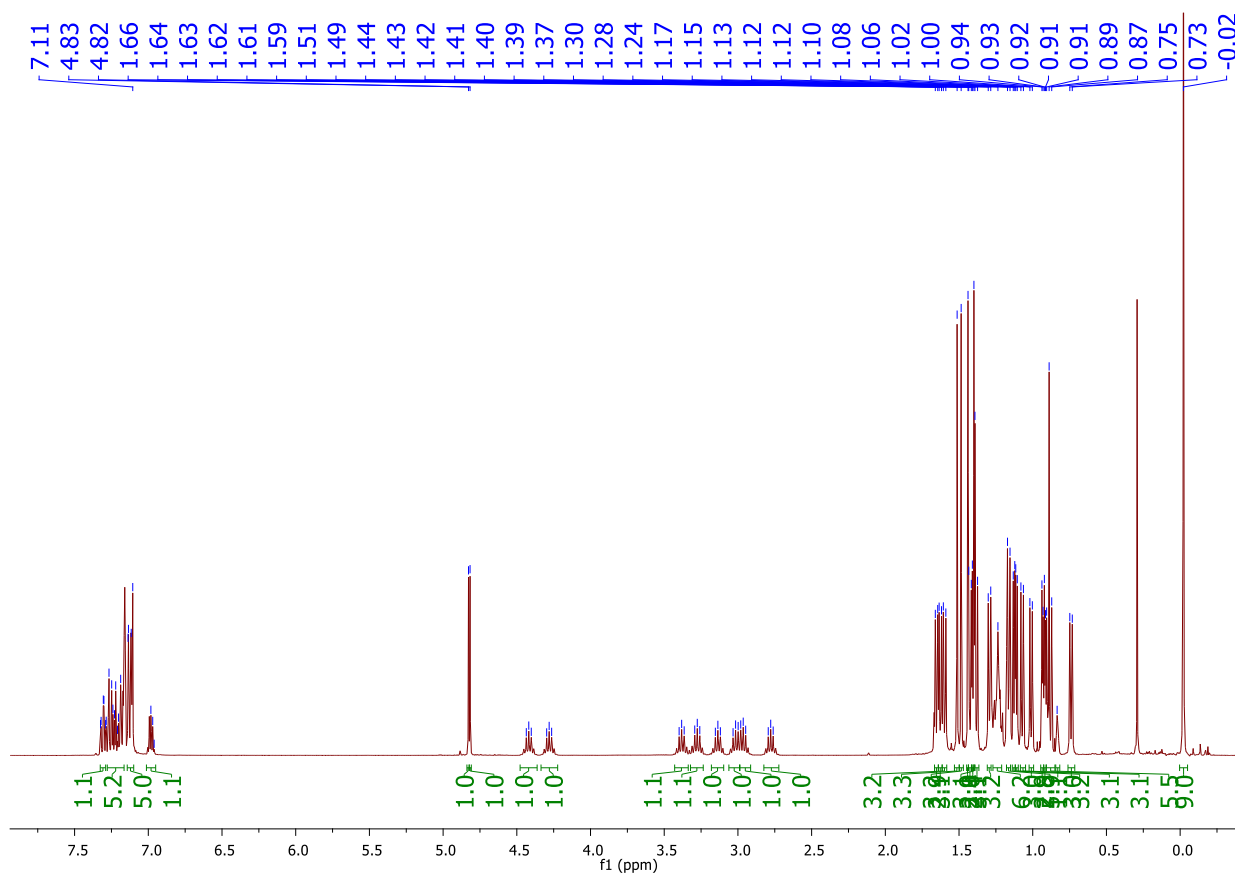

**Figure S20.**  $^1\text{H}$  NMR (400 MHz,  $\text{C}_6\text{D}_6$ , 298 K) spectrum of compound **6**.

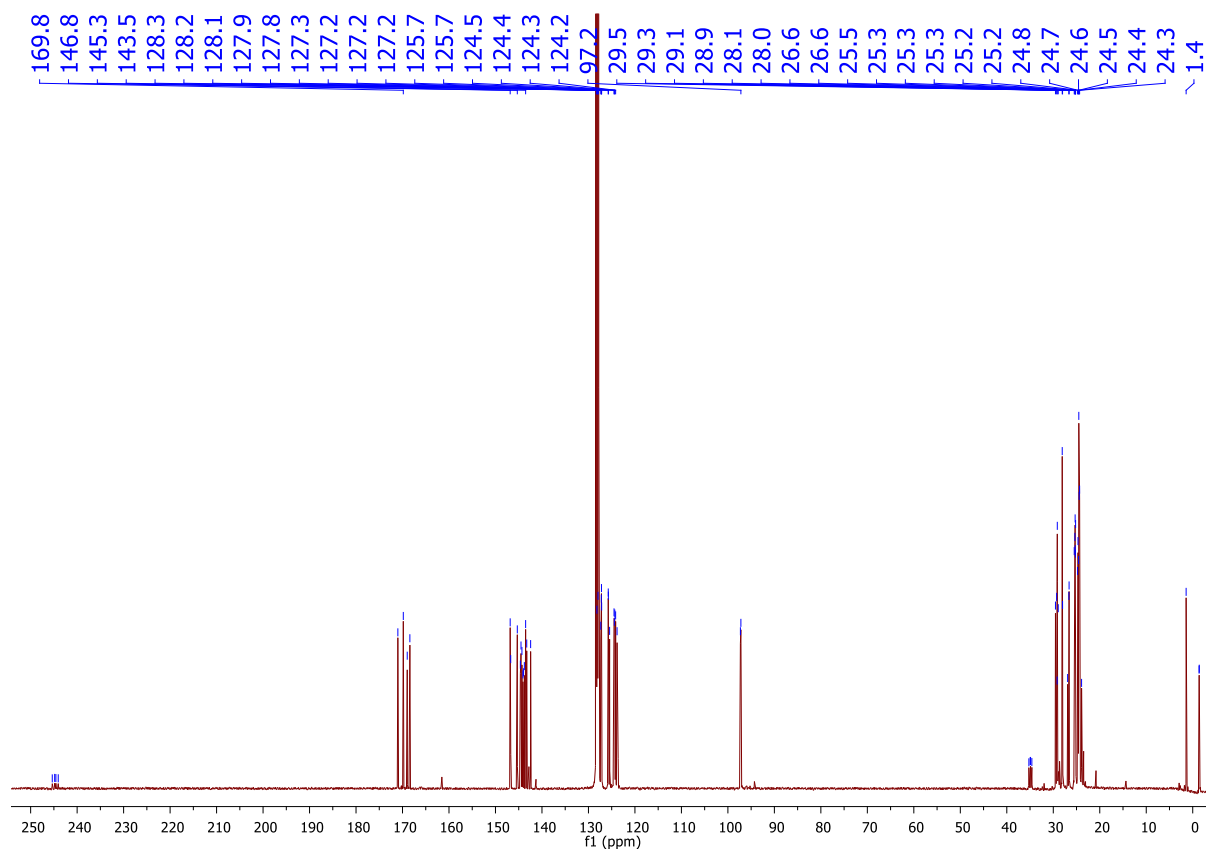

**Figure S21.**  $^{13}\text{C}\{^1\text{H}\}$  NMR (100 MHz,  $\text{C}_6\text{D}_6$ , 298 K) spectrum of compound **6**.

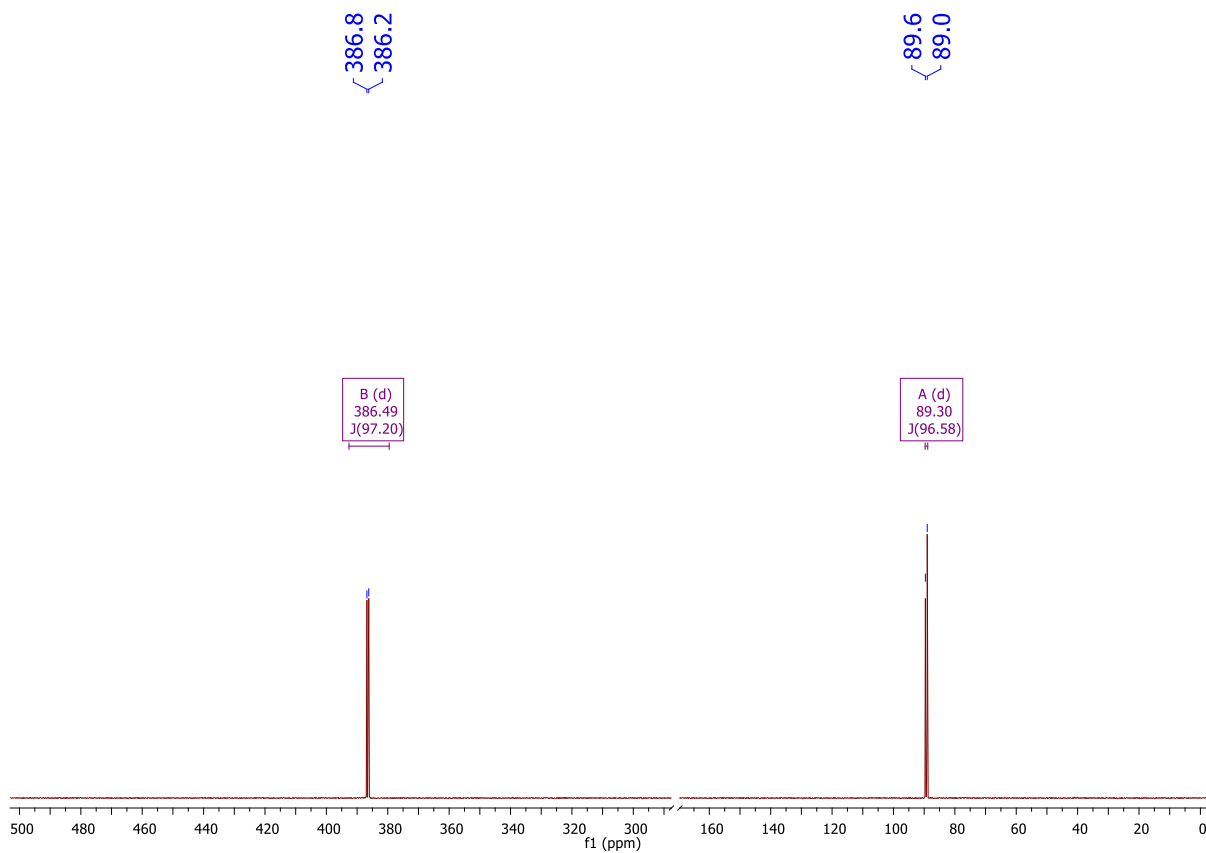

**Figure S22.**  $^{31}\text{P}\{^1\text{H}\}$  NMR (161 MHz,  $\text{C}_6\text{D}_6$ , 298 K) spectrum of compound **6**.

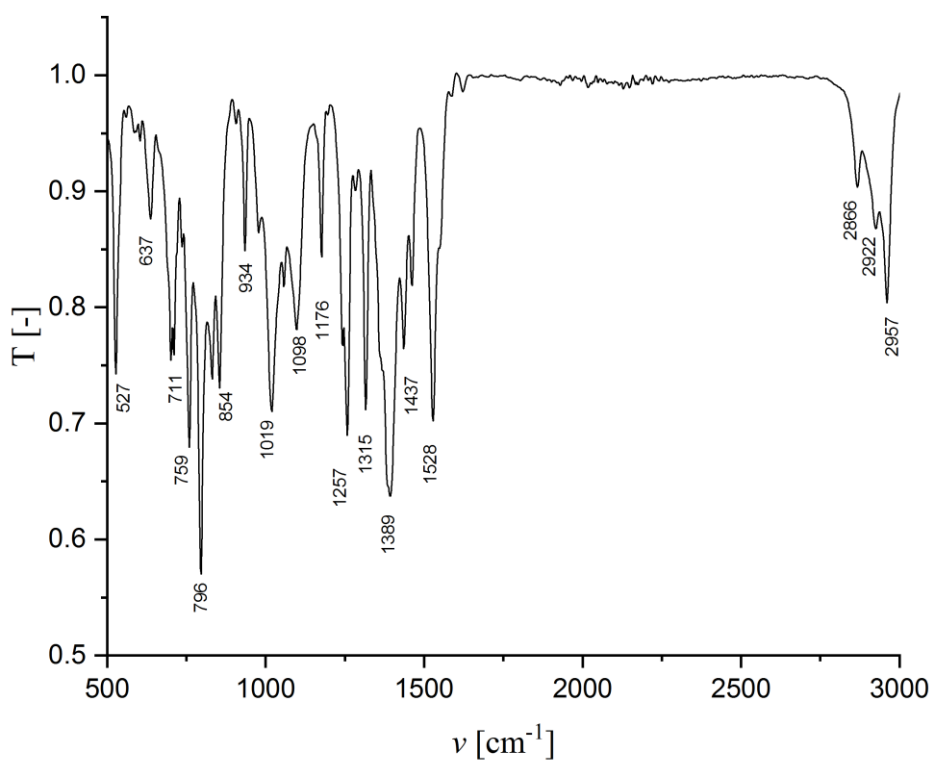

**Figure S23.** ATR-IR spectrum of compound **6**.

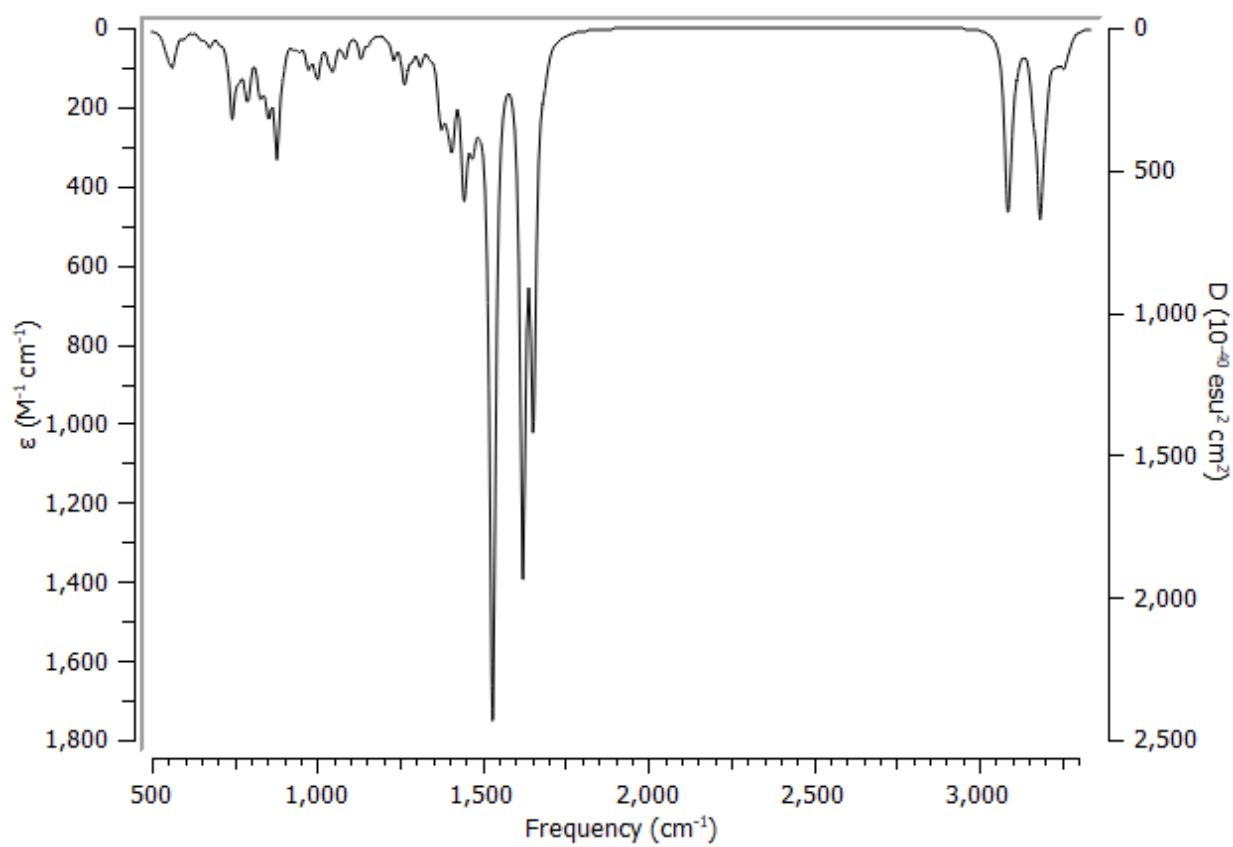

**Figure S24.** IR spectrum of compound **6** simulated by means of PBE0-D3BJ/def2-SVP.

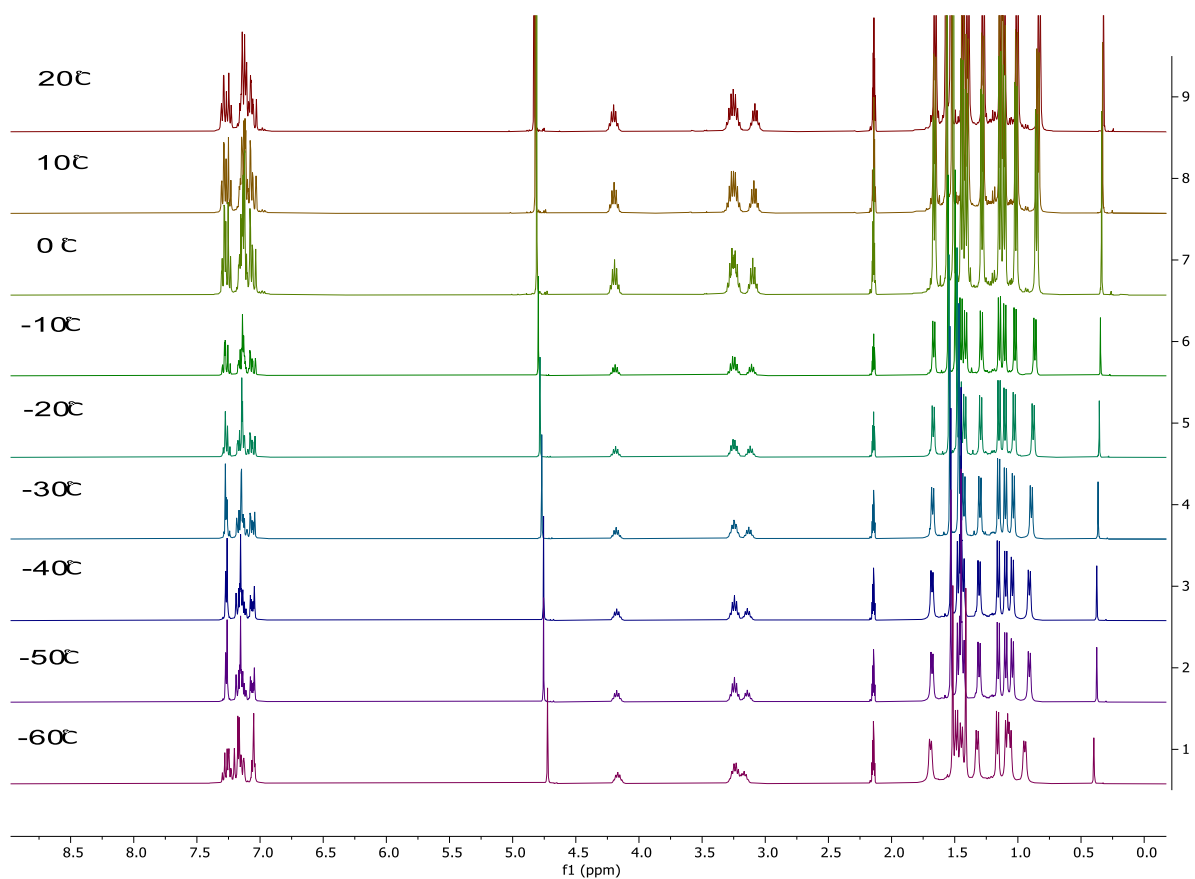

**Figure S25.** Stacked variable temperature (VT, C<sub>7</sub>D<sub>8</sub>) <sup>1</sup>H NMR spectra of **2**.

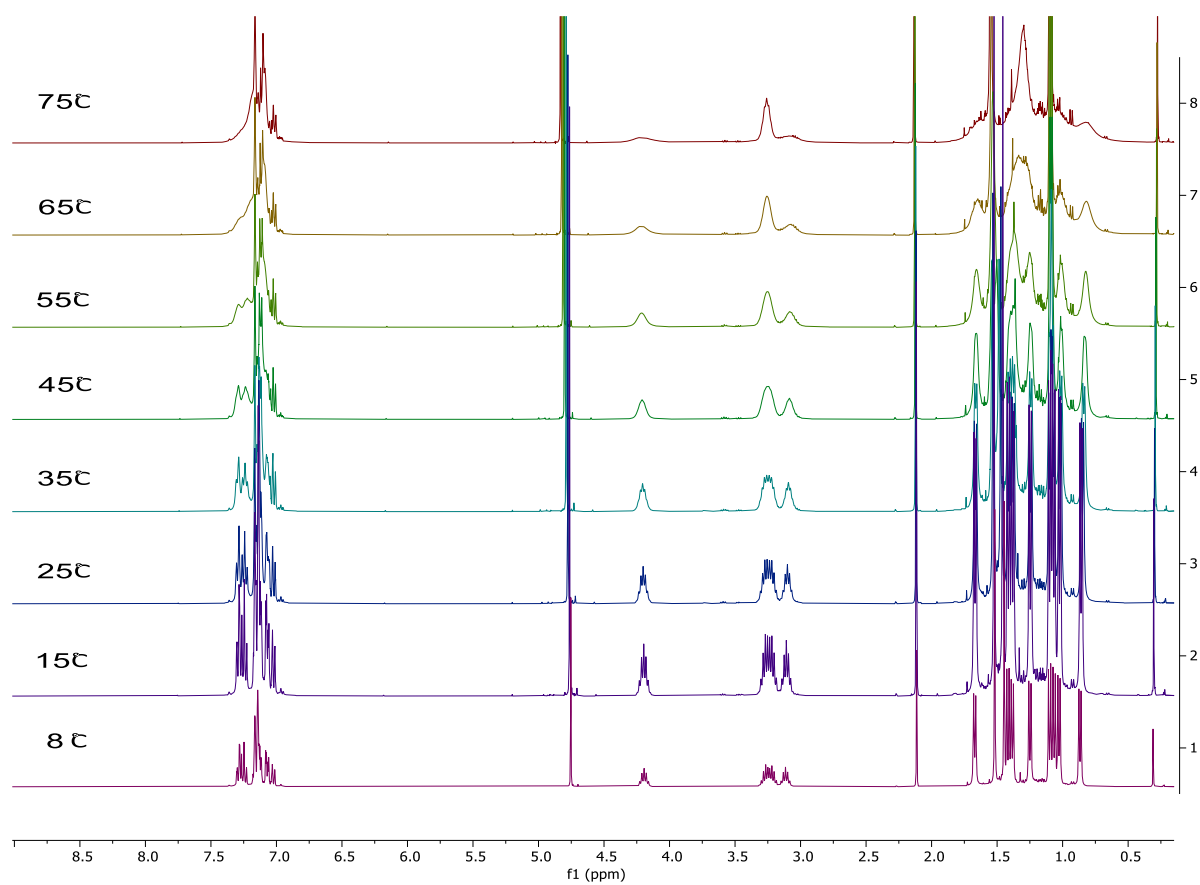

**Figure S26.** Stacked variable temperature (VT, C<sub>7</sub>D<sub>8</sub>) <sup>1</sup>H NMR spectra of **2**.

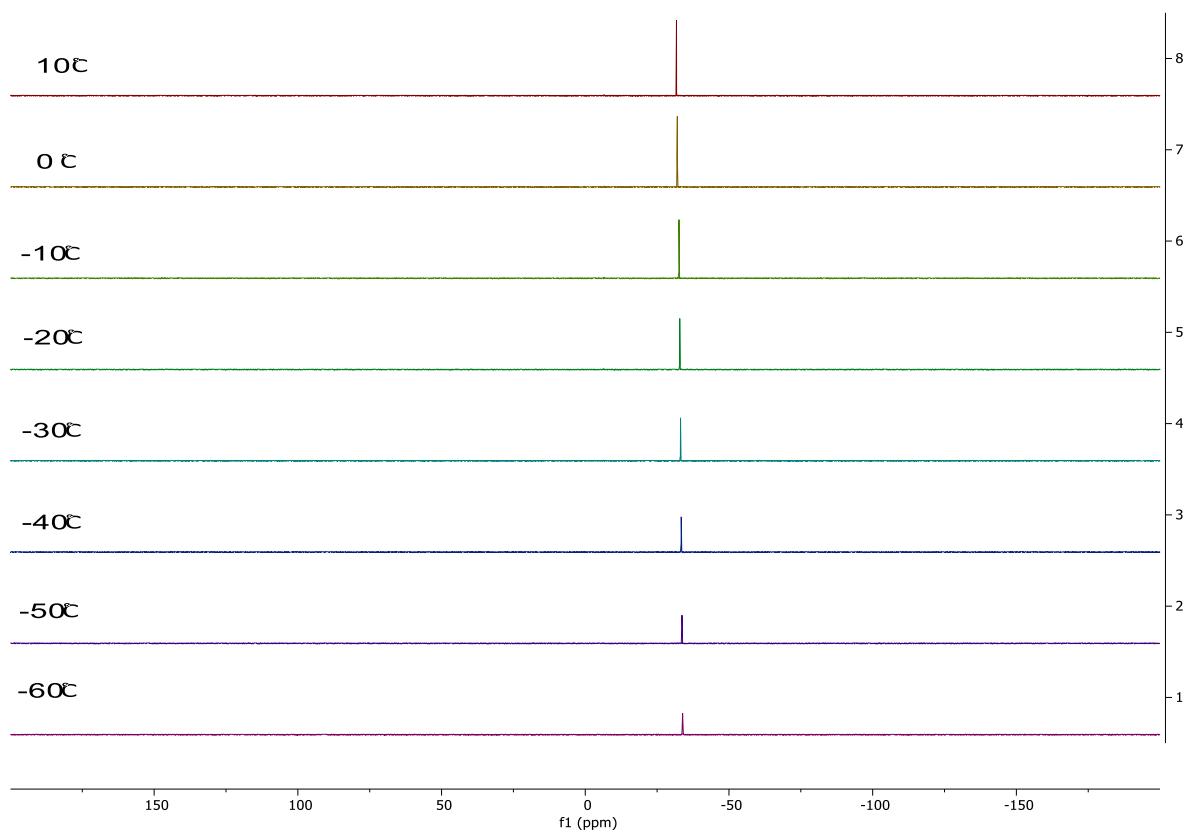

**Figure S27.** Stacked variable temperature (VT,  $\text{C}_7\text{D}_8$ )  $^{31}\text{P}$  NMR spectra of **2**.

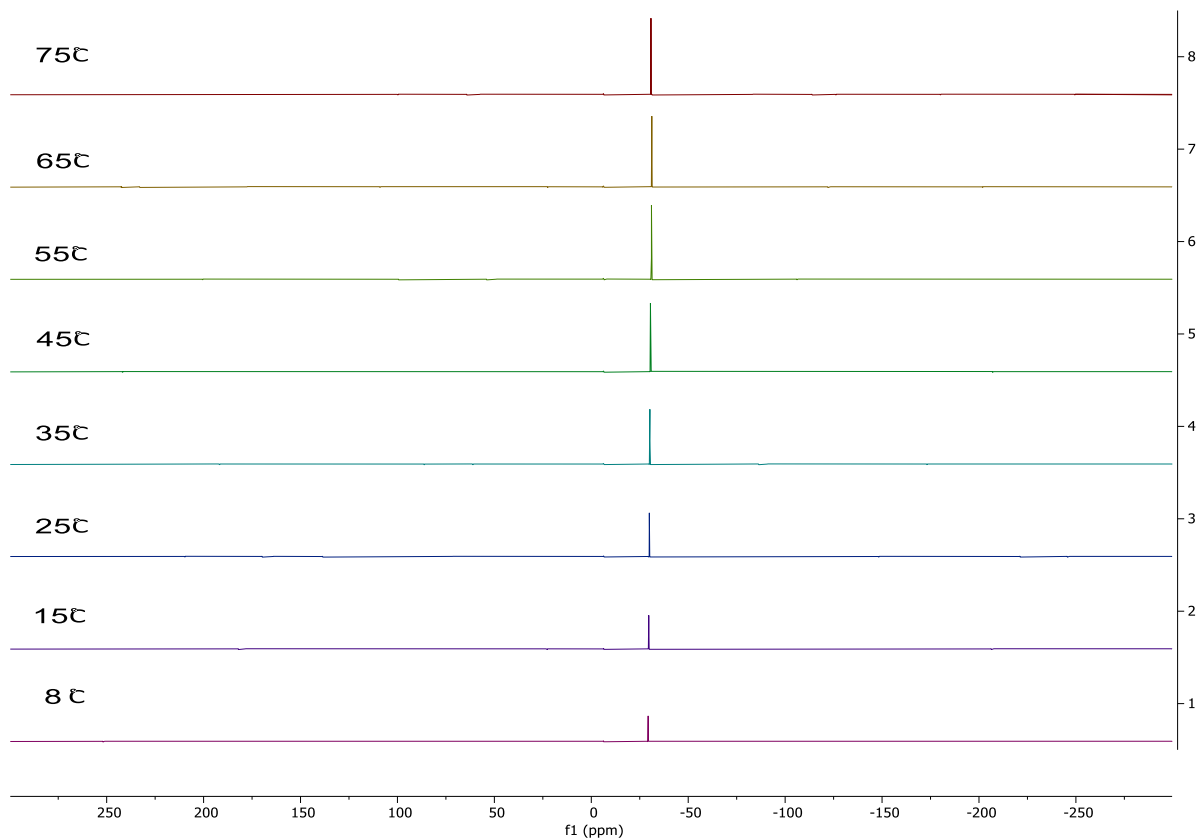

**Figure S28.** Stacked variable temperature (VT,  $\text{C}_7\text{D}_8$ )  $^{31}\text{P}$  NMR spectra of **2**.

### 3. X-Ray Crystallographic Analysis

The crystals were mounted on nylon loops in inert oil. Data for compound **2–4**, and **6** were collected on a Bruker AXS D8 Venture diffractometer with Photon II detector (mono-chromated  $\text{Cu}_{K\alpha}$  radiation,  $\lambda = 1.54178 \text{ \AA}$ , micro-focus source) at 100(2) K. The structures were solved by Direct Methods (SHELXS-97)<sup>[6]</sup> and refined anisotropically by full-matrix least-squares on  $F^2$  (SHELXL-2014).<sup>[7-9]</sup> Absorption corrections were performed semi-empirically from equivalent reflections on basis of multi-scans (Bruker AXS APEX2). Hydrogen atoms were refined using a riding model or rigid methyl groups. In **2** an isopropyl group is disorderd over two positions. Its corresponding bond lengths and angles were restrained to be equal (SADI) and RIGU restraints applied to its atoms' anisotropic displacement parameters. For C27 and C27' additional SIMU restraints were used. In **3** the central moiety is disorderd over two positions. The corresponding bond lengths and angles of the five-membered ring and the P–C bond lengths were restrained to be equal (SADI). A part of a dipp group is disordered correlated to this. The phenyl ring was restrained to planarity (FLAT) for the larger component and constrained to a regular hexagon (AFIX 66) for the smaller one and the bond lengths and angles of the *i*-propyl group were restrained to be equal (SADI). The solvent molecules are disordered over centres of inversion. The local symmetry was ignored in the refinement (negative PART) and the bond lengths and angles were restrained to be equal (SADI). RIGU and SIMU restraints were applied to the displacement parameters of all disordered atoms. Due to their close proximity P1 and C59' were refined with common displacement parameters (EADP). In **4** the displacement parameters of benzene molecule of residue 2 suggest that the molecule is not exactly placed on the centre of inversion and is slightly disordered. Seperating two alternate positions failed. RIGU restraints were applied to the displacement parameters of the solvent molecules' atoms. The residual electron density shows a second orientation of the PCP-carbene moiety, however its occupancy is too small for a successful refinement. The central moiety of **6** is disordered over two positions. This correlates with the disorder of one of the *i*-propyl groups. Two further *i*-propyl groups are disordered independently of this. In addition, the solvent molecule is highly disordered and could only be modelled crudely by three alternate position. Its bond lengths and angles were restrained to be equal (SADI) and RIGU and SIMU restrained were applied to the displacement parameters. CCDC-2362185 (mks\_018m, **2**), -2362186 (mks\_101m, **3**), -2362187 (mks\_022m, **4**), and -2362188 (mks\_100m, **6**) contain the supplementary crystallographic data for this paper. These data can be obtained free of charge from The Cambridge Crystallographic Data Centre via [www.ccdc.cam.ac.uk/data\\_request/cif](http://www.ccdc.cam.ac.uk/data_request/cif).

**Table S1.** Crystal data and structure refinement of **2** and **3**.

| Compound                                                   | <b>2</b>                                                                       | <b>3</b>                                                                        |
|------------------------------------------------------------|--------------------------------------------------------------------------------|---------------------------------------------------------------------------------|
| Emp. formula                                               | C <sub>59</sub> H <sub>82</sub> Ga <sub>2</sub> N <sub>4</sub> OP <sub>2</sub> | C <sub>72</sub> H <sub>108</sub> Ga <sub>2</sub> N <sub>6</sub> OP <sub>2</sub> |
| Formula weight                                             | 1064.66                                                                        | 1275.02                                                                         |
| Temperature [K]                                            | 100(2)                                                                         | 100(2)                                                                          |
| Crystal system                                             | monoclinic                                                                     | monoclinic                                                                      |
| Space group                                                | <i>P2<sub>1</sub>/c</i>                                                        | <i>C2/c</i>                                                                     |
| <i>a</i> [Å]                                               | 23.5423(10)                                                                    | 26.3977(9)                                                                      |
| <i>b</i> [Å]                                               | 13.8181(6)                                                                     | 13.4903(5)                                                                      |
| <i>c</i> [Å]                                               | 17.4303(8)                                                                     | 40.1349(13)                                                                     |
| $\alpha$ [°]                                               | 90                                                                             | 90                                                                              |
| $\beta$ [°]                                                | 96.3710(11)                                                                    | 91.7723(15)                                                                     |
| $\gamma$ [°]                                               | 90                                                                             | 90                                                                              |
| <i>V</i> [Å <sup>3</sup> ]                                 | 5635.2(4)                                                                      | 14285.7(9)                                                                      |
| <i>Z</i>                                                   | 4                                                                              | 8                                                                               |
| $\rho$ [Mgm <sup>-3</sup> ]                                | 1.255                                                                          | 1.186                                                                           |
| $\mu$ [mm <sup>-1</sup> ]                                  | 2.023                                                                          | 1.681                                                                           |
| <i>F</i> (000)                                             | 2256                                                                           | 5456                                                                            |
| Crystal size [mm]                                          | 0.221 × 0.221 × 0.192                                                          | 0.367 × 0.102 × 0.100                                                           |
| $\theta$ max [°]                                           | 80.782                                                                         | 79.834                                                                          |
| Index ranges                                               | -29 ≤ <i>h</i> ≤ 25;<br>-17 ≤ <i>k</i> ≤ 17<br>-22 ≤ <i>l</i> ≤ 22             | -33 ≤ <i>h</i> ≤ 33<br>-17 ≤ <i>k</i> ≤ 17<br>-50 ≤ <i>l</i> ≤ 51               |
| No. of reflect. collected                                  | 210810                                                                         | 304149                                                                          |
| Unique reflect.                                            | 12297                                                                          | 15479                                                                           |
| <i>R</i> <sub>int</sub>                                    | 0.0254                                                                         | 0.0765                                                                          |
| Data / restraints / params.                                | 12297 / 31 / 663                                                               | 13371/ 1033 / 1066                                                              |
| Goodness-of-fit on <i>F</i> <sup>2</sup>                   | 1.052                                                                          | 1.079                                                                           |
| <i>R</i> 1 [ <i>I</i> > 2σ( <i>I</i> )]                    | 0.0238                                                                         | 0.0479                                                                          |
| <i>wR</i> 2 [ <i>I</i> > 2σ( <i>I</i> )]                   | 0.0627                                                                         | 0.1128                                                                          |
| <i>R</i> 1 [all data]                                      | 0.0239                                                                         | 0.0568                                                                          |
| <i>wR</i> 2 [all data]                                     | 0.0628                                                                         | 0.1188                                                                          |
| $\Delta\rho_{\text{final}}$ (max/min) [e·Å <sup>-3</sup> ] | 0.379/-0.411                                                                   | 0.422/-0.659                                                                    |



**Table S2.** Crystal data and structure refinement of **4** and **6**.

| Compound                                                   | <b>4</b>                                                                        | <b>6</b>                                                                           |
|------------------------------------------------------------|---------------------------------------------------------------------------------|------------------------------------------------------------------------------------|
| Emp. formula                                               | C <sub>79</sub> H <sub>111</sub> Ga <sub>2</sub> N <sub>6</sub> OP <sub>2</sub> | C <sub>69</sub> H <sub>106</sub> Ga <sub>2</sub> N <sub>4</sub> OP <sub>2</sub> Si |
| Formula weight                                             | 1362.11                                                                         | 1237.04                                                                            |
| Temperature [K]                                            | 100(2)                                                                          | 100(2)                                                                             |
| Crystal system                                             | monoclinic                                                                      | monoclinic                                                                         |
| Space group                                                | <i>C</i> 2/ <i>c</i>                                                            | <i>P</i> 2 <sub>1</sub> / <i>c</i>                                                 |
| <i>a</i> [Å]                                               | 20.7310(4)                                                                      | 15.1894(6)                                                                         |
| <i>b</i> [Å]                                               | 18.2400(4)                                                                      | 13.1269(5)                                                                         |
| <i>c</i> [Å]                                               | 39.5206(7)                                                                      | 34.6139(13)                                                                        |
| $\alpha$ [°]                                               | 90                                                                              | 90                                                                                 |
| $\beta$ [°]                                                | 95.9543(13)                                                                     | 96.719(2)                                                                          |
| $\gamma$ [°]                                               | 90                                                                              | 90                                                                                 |
| <i>V</i> [Å <sup>3</sup> ]                                 | 14863.4(5)                                                                      | 6854.3(5)                                                                          |
| <i>Z</i>                                                   | 8                                                                               | 4                                                                                  |
| $\rho$ [Mgm <sup>-3</sup> ]                                | 1.217                                                                           | 1.199                                                                              |
| $\mu$ [mm <sup>-1</sup> ]                                  | 1.650                                                                           | 1.890                                                                              |
| <i>F</i> (000)                                             | 5816                                                                            | 2648                                                                               |
| Crystal size [mm]                                          | 0.319 × 0.203 × 0.074                                                           | 0.242 × 0.168 × 0.049                                                              |
| $\theta$ max [°]                                           | 81.015                                                                          | 80.847                                                                             |
| Index ranges                                               | -26 ≤ <i>h</i> ≤ 26;<br>-23 ≤ <i>k</i> ≤ 23<br>-50 ≤ <i>l</i> ≤ 50              | -19 ≤ <i>h</i> ≤ 19<br>-16 ≤ <i>k</i> ≤ 16<br>-44 ≤ <i>l</i> ≤ 44                  |
| No. of reflect. collected                                  | 473924                                                                          | 297275                                                                             |
| Unique reflect.                                            | 16343                                                                           | 14958                                                                              |
| <i>R</i> <sub>int</sub>                                    | 0.0292                                                                          | 0.0783                                                                             |
| Data / restraints / params.                                | 16343 / 45 / 838                                                                | 13022 / 343 / 1017                                                                 |
| Goodness-of-fit on <i>F</i> <sup>2</sup>                   | 1.109                                                                           | 1.187                                                                              |
| <i>R</i> 1 [ <i>I</i> > 2σ( <i>I</i> )]                    | 0.0351                                                                          | 0.0580                                                                             |
| <i>wR</i> 2 [ <i>I</i> > 2σ( <i>I</i> )]                   | 0.0899                                                                          | 0.1255                                                                             |
| <i>R</i> 1 [all data]                                      | 0.0352                                                                          | 0.0674                                                                             |
| <i>wR</i> 2 [all data]                                     | 0.0899                                                                          | 0.1307                                                                             |
| $\Delta\rho_{\text{final}}$ (max/min) [e·Å <sup>-3</sup> ] | 1.771/-0.646                                                                    | 0.604/-0.462                                                                       |

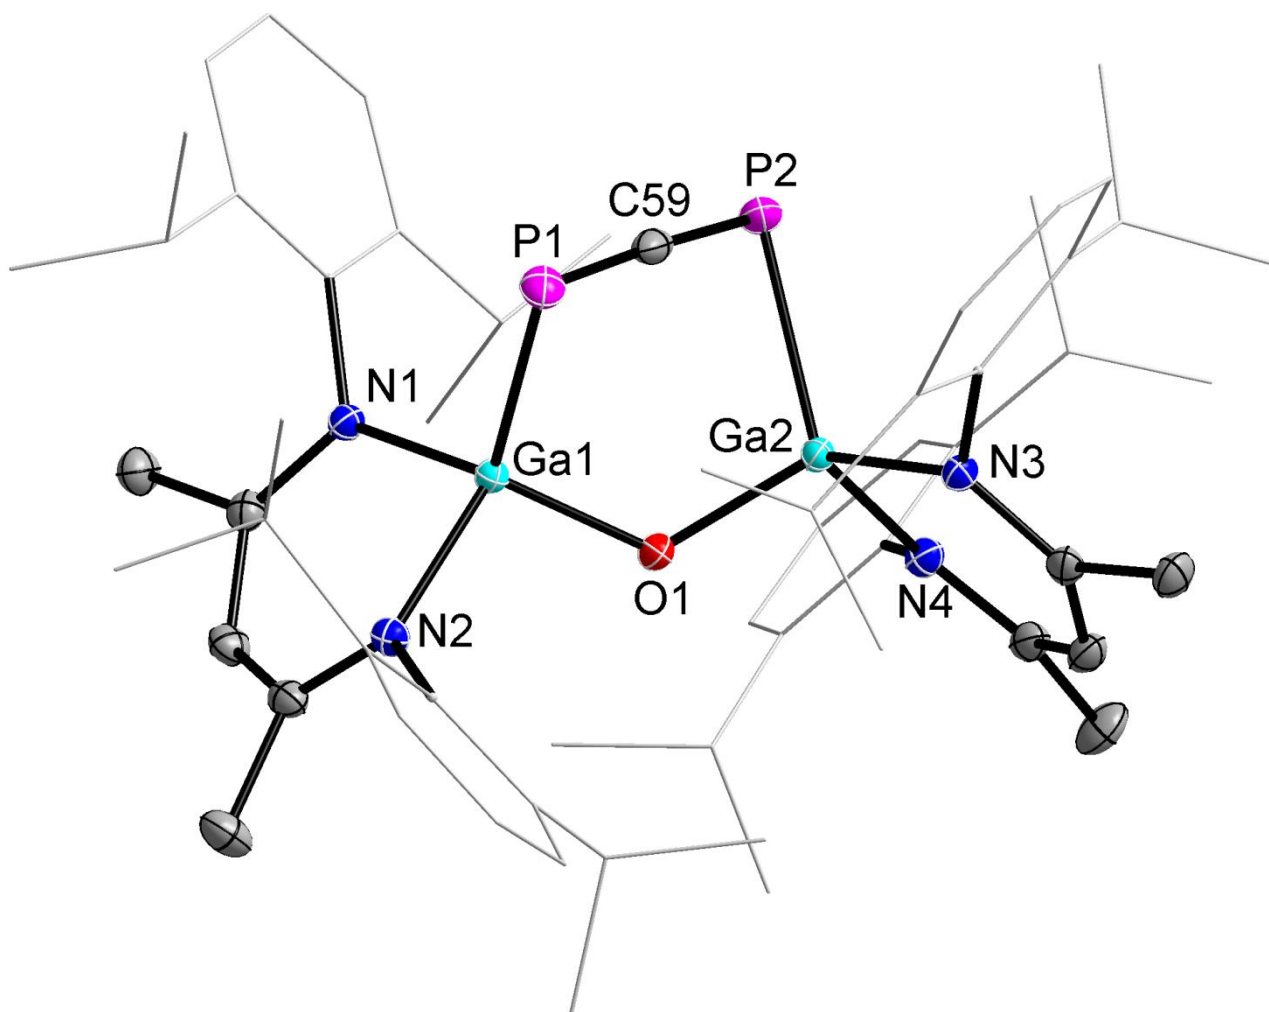

**Figure S29.** Molecular structure of compound **2** with thermal ellipsoids at 50% probability level. The hydrogen atoms and alternate positions of the disordered parts are omitted for clarity. Selected bond length (Å) and angles (°): Ga(1)–O(1) 1.8082(8), Ga(1)–N(2) 1.9629(9), Ga(1)–N(1) 1.9745(9), Ga(1)–P(1) 2.3767(3), Ga(2)–O(1) 1.8046(8), Ga(2)–N(3) 1.9728(10), Ga(2)–N(4) 1.9773(10), Ga(2)–P(2) 2.3845(3), P(1)–C(59) 1.6516(13), P(2)–C(59) 1.6506(13); N(2)–Ga(1)–N(1) 95.48(4), O(1)–Ga(1)–P(1) 107.78(3), N(2)–Ga(1)–P(1) 118.03(3), N(1)–Ga(1)–P(1) 110.91(3), O(1)–Ga(2)–N(3) 121.18(4), O(1)–Ga(2)–N(4) 102.86(4), N(3)–Ga(2)–N(4) 95.45(4), O(1)–Ga(2)–P(2) 107.62(3), N(3)–Ga(2)–P(2) 110.97(3), N(4)–Ga(2)–P(2) 118.83(3), C(59)–P(1)–Ga(1) 81.63(4), C(59)–P(2)–Ga(2) 81.39(4), Ga(2)–O(1)–Ga(1) 123.63(4).

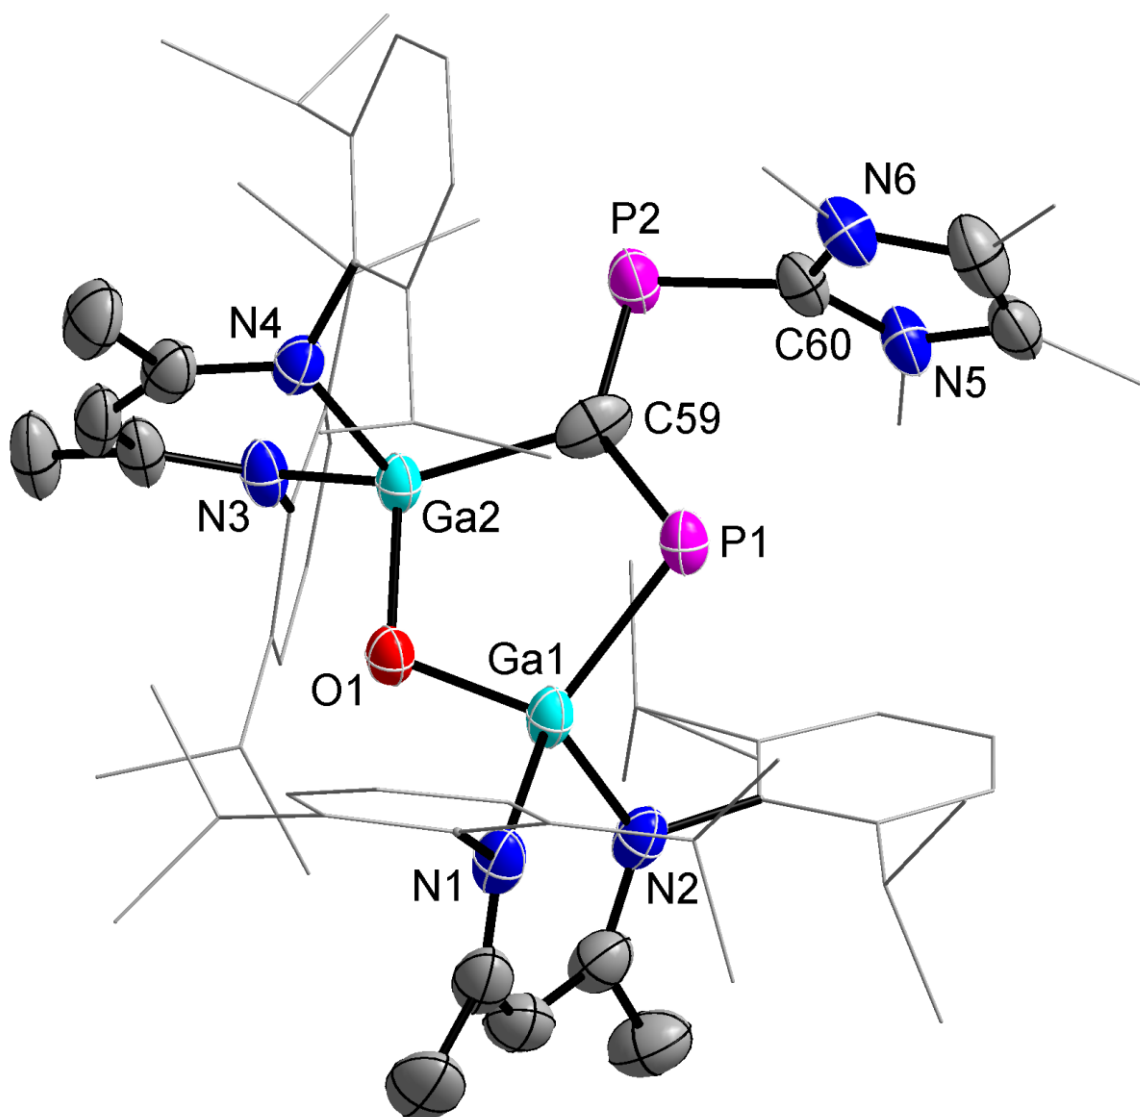

**Figure S30.** Molecular structure of compound **3** with thermal ellipsoids at 50% probability level. The hydrogen atoms, alternate positions of the disordered parts, and disordered solvent molecules (*n*-hexane) are omitted for clarity. Selected bond length (Å) and angles (°): Ga(1)–O(1) 1.8239(16), Ga(1)–N(1) 2.006(2), Ga(1)–N(2) 2.007(2), Ga(1)–P(1) 2.2926(11), Ga(2)–O(1) 1.8127(17), Ga(2)–N(4) 1.998(2), Ga(2)–N(3) 2.021(2), Ga(2)–C(59) 2.092(8), P(1)–C(59) 1.801(6), P(2)–C(59) 1.623(7), P(2)–C(60) 1.847(3), N(5)–C(60) 1.342(4), N(6)–C(60) 1.335(4); N(1)–Ga(1)–N(2) 92.92(9), O(1)–Ga(1)–P(1) 107.50(6), N(4)–Ga(2)–N(3) 93.06(9), O(1)–Ga(2)–C(59) 108.38(19), Ga(2)–O(1)–Ga(1) 110.01(8), P(2)–C(59)–P(1) 128.9(5), P(2)–C(59)–Ga(2) 119.9(3), P(1)–C(59)–Ga(2) 109.3(4), C(59)–P(2)–C(60) 97.5(3).

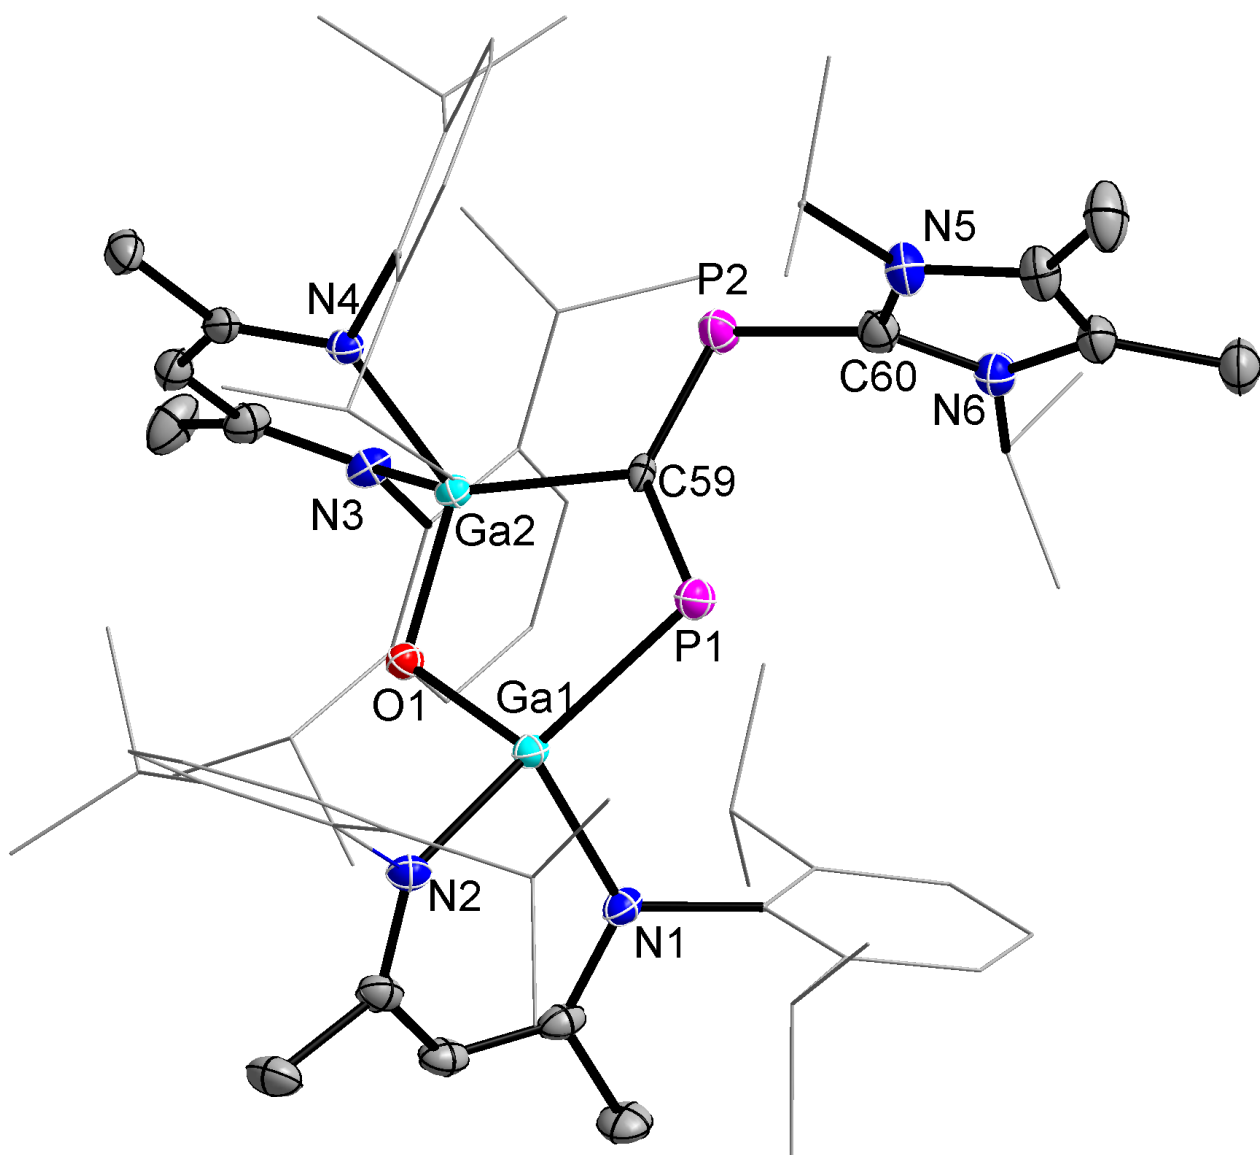

**Figure S31.** Molecular structure of compound **4** with thermal ellipsoids at 50% probability level. The hydrogen atoms and solvent molecules (benzene) are omitted for clarity. Selected bond length (Å) and angles (°): Ga(1)–O(1) 1.8241(11), Ga(1)–N(1) 2.0160(13), Ga(1)–N(2) 2.0319(14), Ga(1)–P(1) 2.3351(4), Ga(2)–O(1) 1.8140(11), Ga(2)–N(4) 2.0033(13), Ga(2)–N(3) 2.0249(13), Ga(2)–C(59) 2.0285(14), P(1)–C(59) 1.7716(15), P(2)–C(59) 1.6990(15), P(2)–C(60) 1.8571(17), N(5)–C(60) 1.354(2), N(6)–C(60) 1.354(2); N(1)–Ga(1)–N(2) 91.01(6), O(1)–Ga(1)–P(1) 106.85(4), O(1)–Ga(2)–C(59) 107.17(5), C(59)–P(1)–Ga(1) 96.56(5), C(59)–P(2)–C(60) 105.29(7), Ga(2)–O(1)–Ga(1) 111.21(6), P(2)–C(59)–P(1) 129.91(8), P(2)–C(59)–Ga(2) 114.91(8), P(1)–C(59)–Ga(2) 114.92(8).

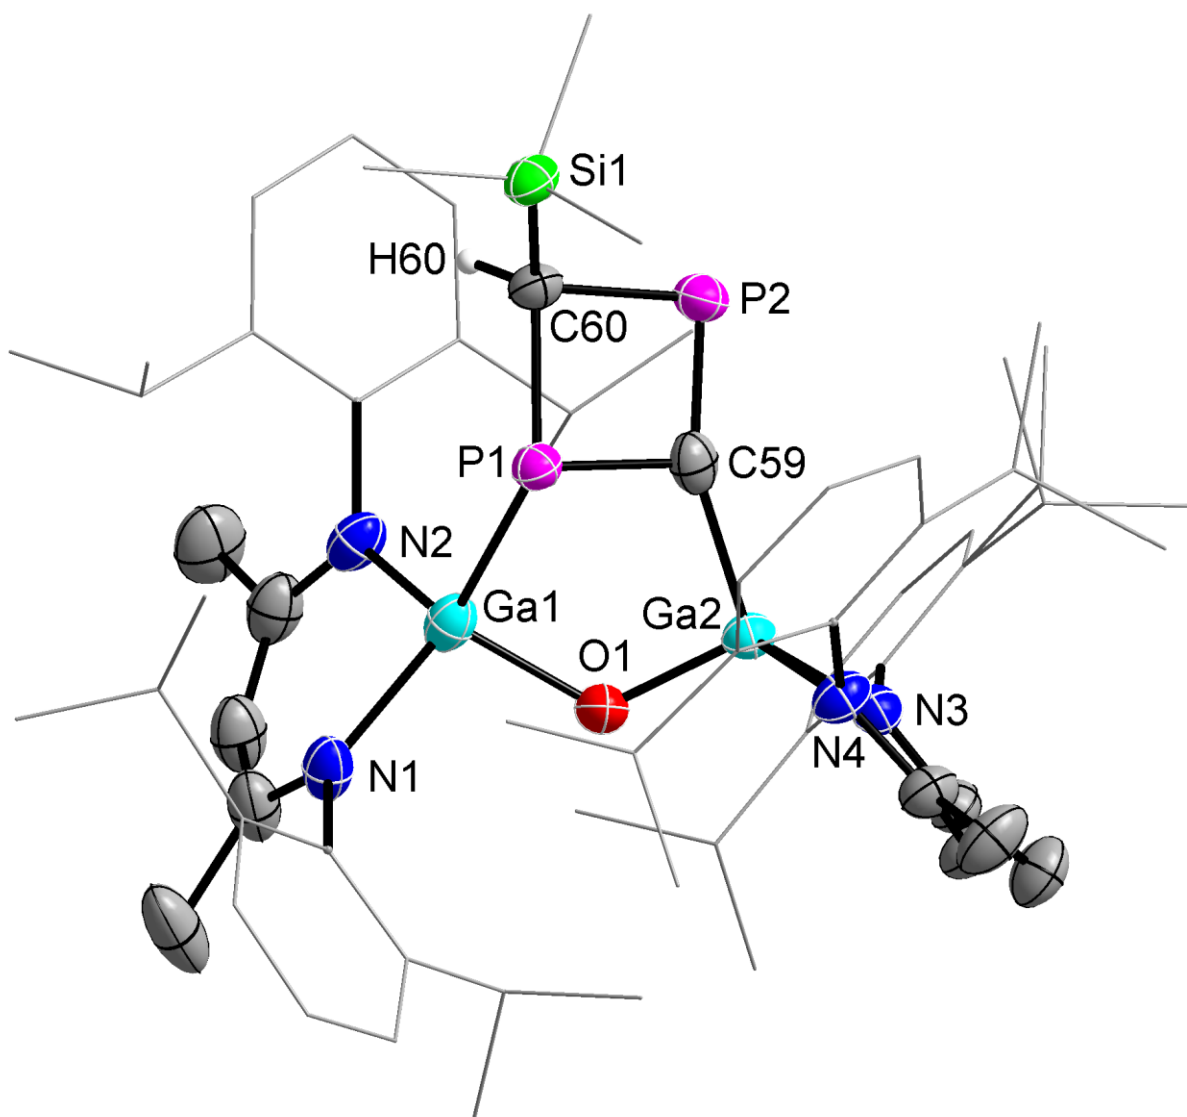

**Figure S32.** Molecular structure of compound **6** with thermal ellipsoids at 50% probability level. The hydrogen atoms, alternate positions of the disordered parts, and solvent molecules (*n*-hexane) are omitted for clarity. Selected bond length (Å) and angles (°): Ga(1)–O(1) 1.820(2), Ga(1)–N(1) 1.980(3), Ga(1)–N(2) 1.982(3), Ga(1)–P(1) 2.503(2), Ga(2)–O(1) 1.815(2), Ga(2)–C(59) 1.940(10), Ga(2)–N(3) 1.977(2), Ga(2)–N(4) 1.989(3) P(1)–C(59) 1.827(9), P(1)–C(60) 1.888(6), P(2)–C(59) 1.720(10), P(2)–C(60) 1.875(6), Si(1)–C(60) 1.874(6); N(1)–Ga(1)–N(2) 94.20(12), O(1)–Ga(1)–P(1) 95.28(8) O(1)–Ga(2)–C(59) 102.7(3), N(3)–Ga(2)–N(4) 94.14(10) C(59)–P(1)–C(60) 84.9(4), C(59)–P(1)–Ga(1) 91.6(3), C(60)–P(1)–Ga(1) 121.62(19), C(59)–P(2)–C(60) 88.3(3), P(2)–C(59)–P(1) 96.9(5), P(2)–C(59)–Ga(2) 150.8(6), P(1)–C(59)–Ga(2) 110.4(5), P(2)–C(60)–P(1) 89.8(2), Ga(2)–O(1)–Ga(1) 118.55(12).

#### 4. UV-vis Spectroscopy

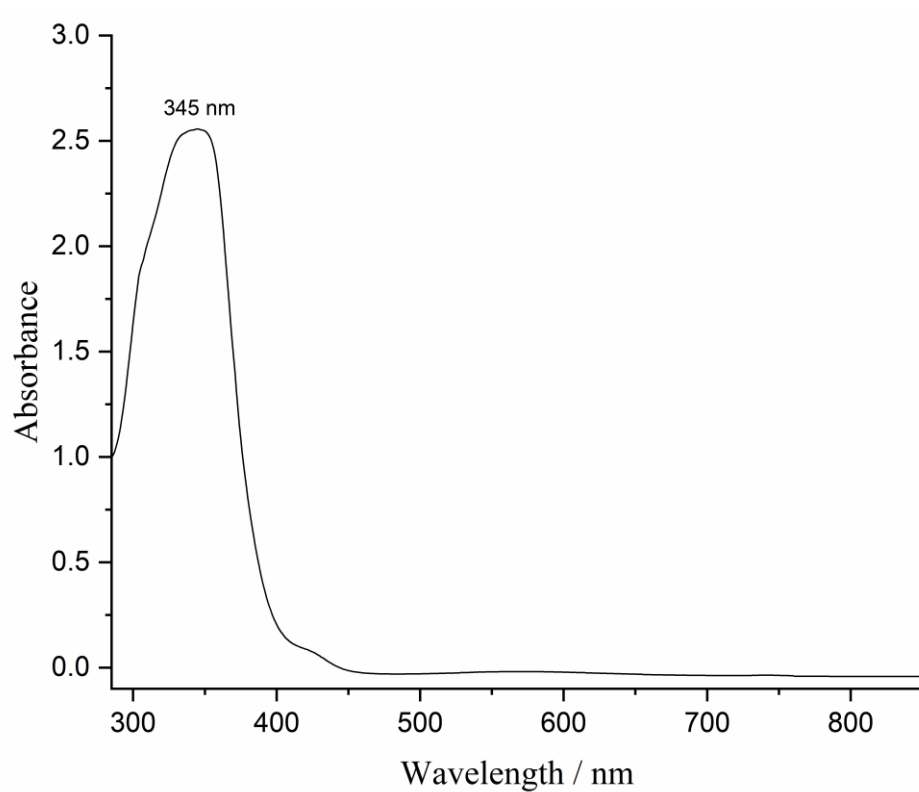

**Figure S33.** UV-visible spectrum of **2** ( $10^{-4}$  M) recorded in THF.

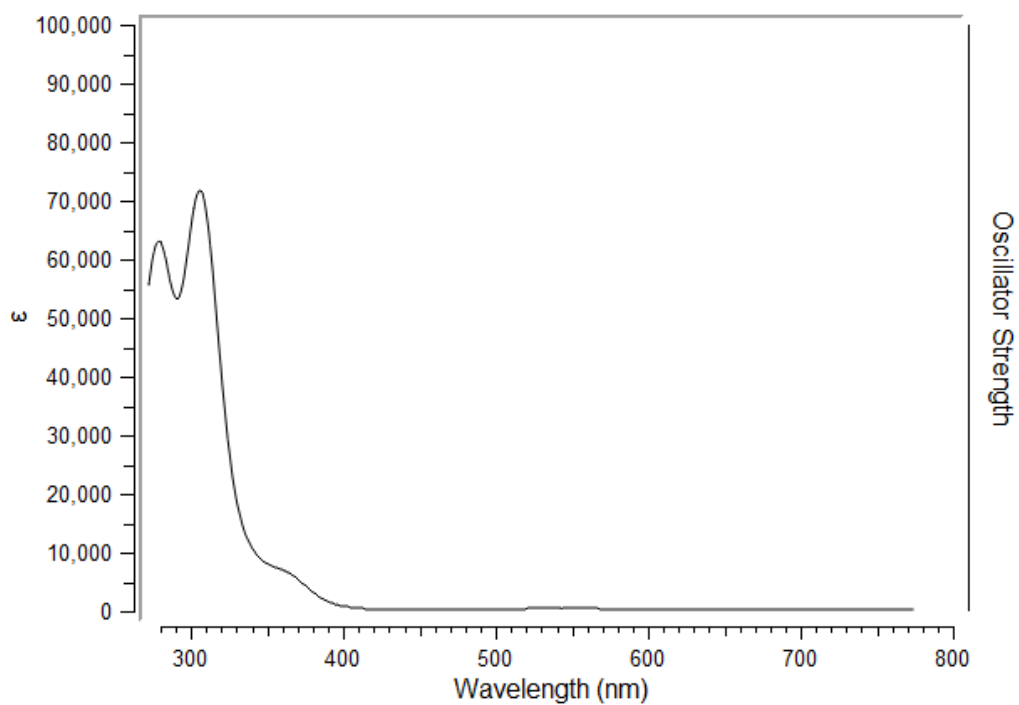

**Figure S34.** UV-visible spectrum of **2** simulated at TD-PBE0-D3BJ(SMD,THF)/def2-SVP level of theory.

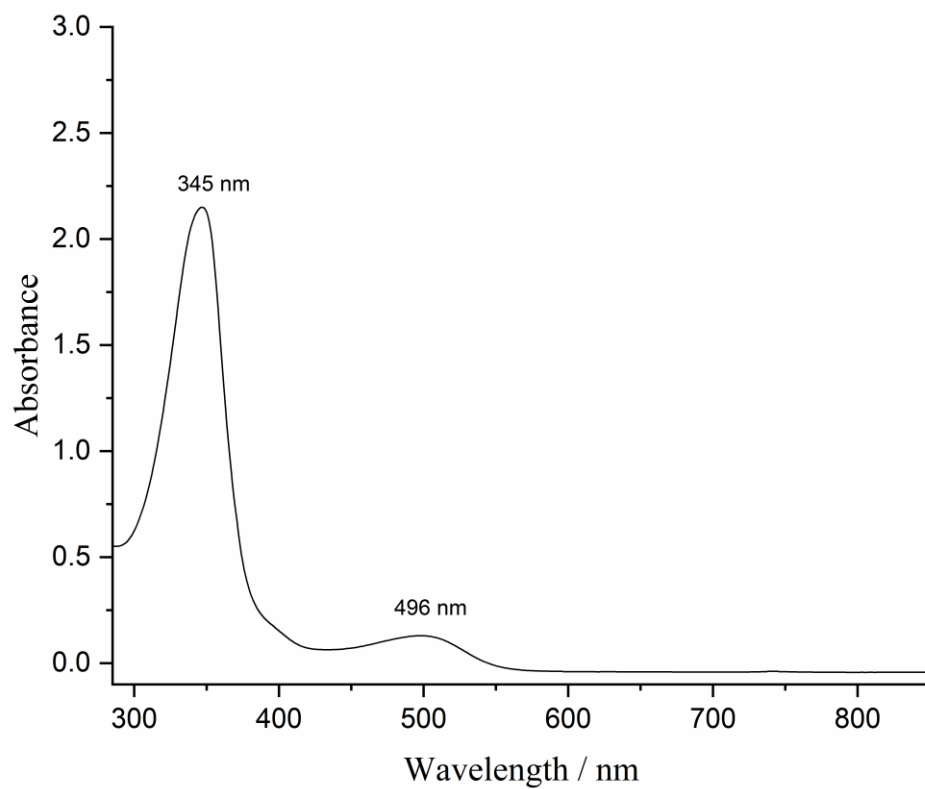

**Figure S35.** UV-visible spectrum of **3** ( $10^{-4}$  M) recorded in THF.

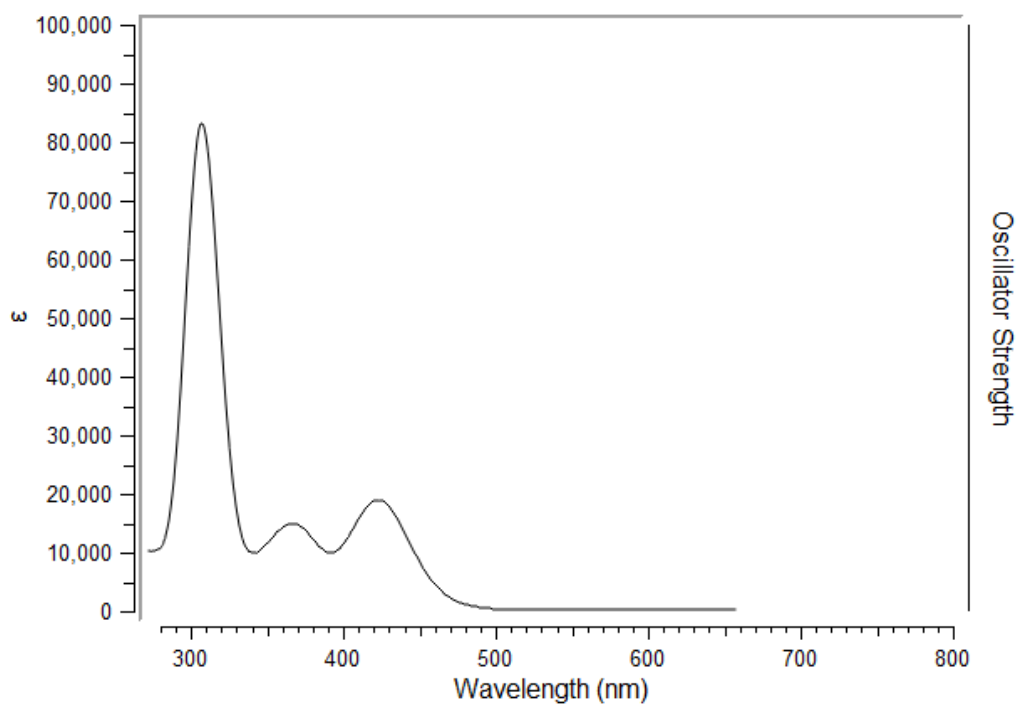

**Figure S36.** UV-visible spectrum of **3** simulated at TD-PBE0-D3BJ(SMD,THF)/def2-SVP level of theory.

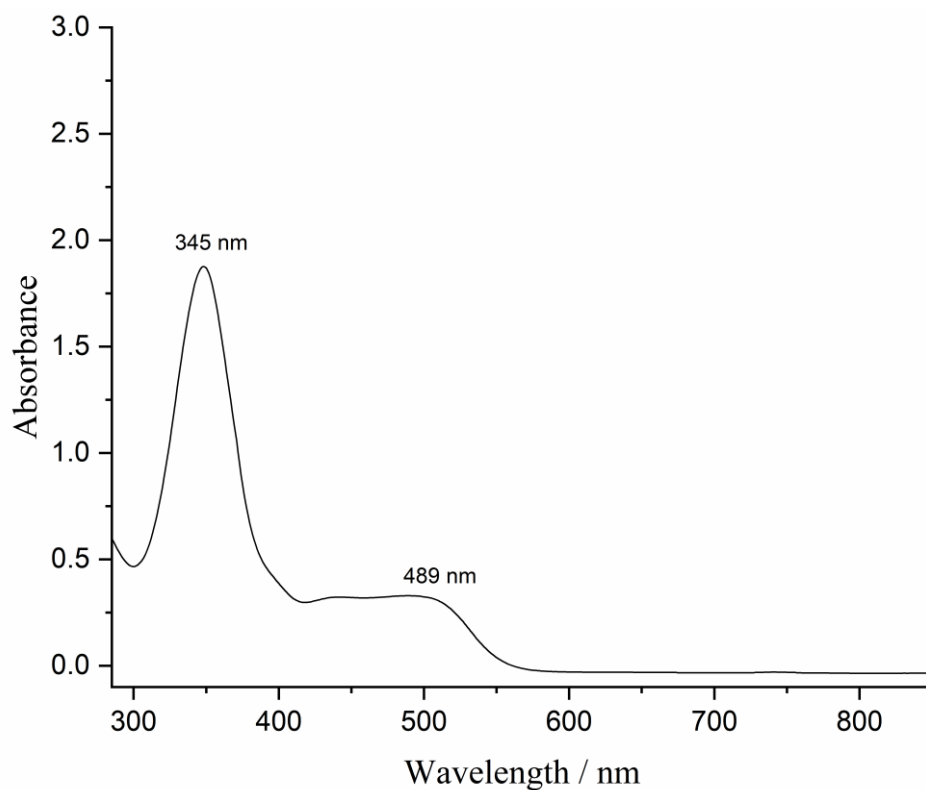

**Figure S37.** UV-visible spectrum of **4** ( $10^{-4}$  M) recorded in THF.

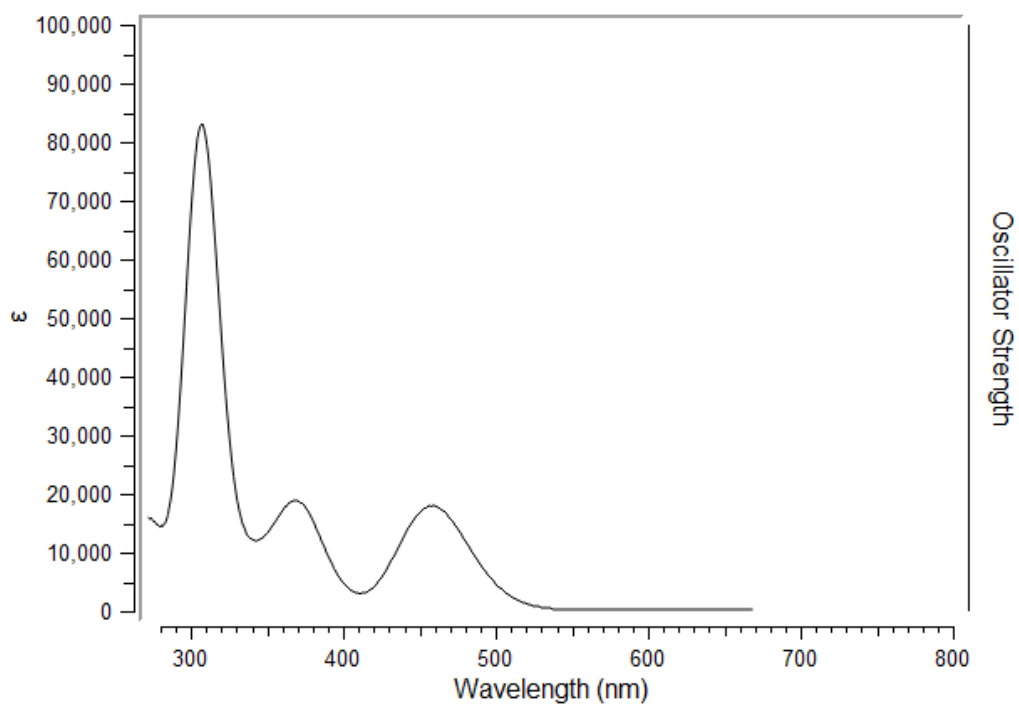

**Figure S38.** UV-visible spectrum of **4** simulated at TD-PBE0-D3BJ(SMD,THF)/def2-SVP level of theory.



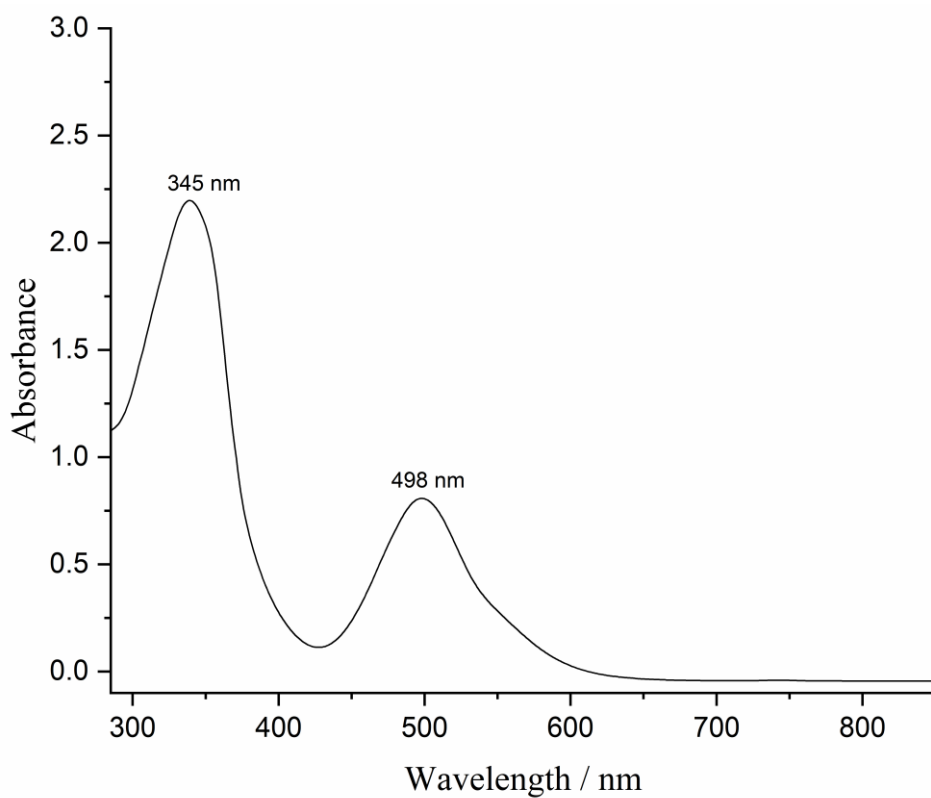

**Figure S39.** UV-visible spectrum of **5** ( $10^{-4}$  M) recorded in THF.

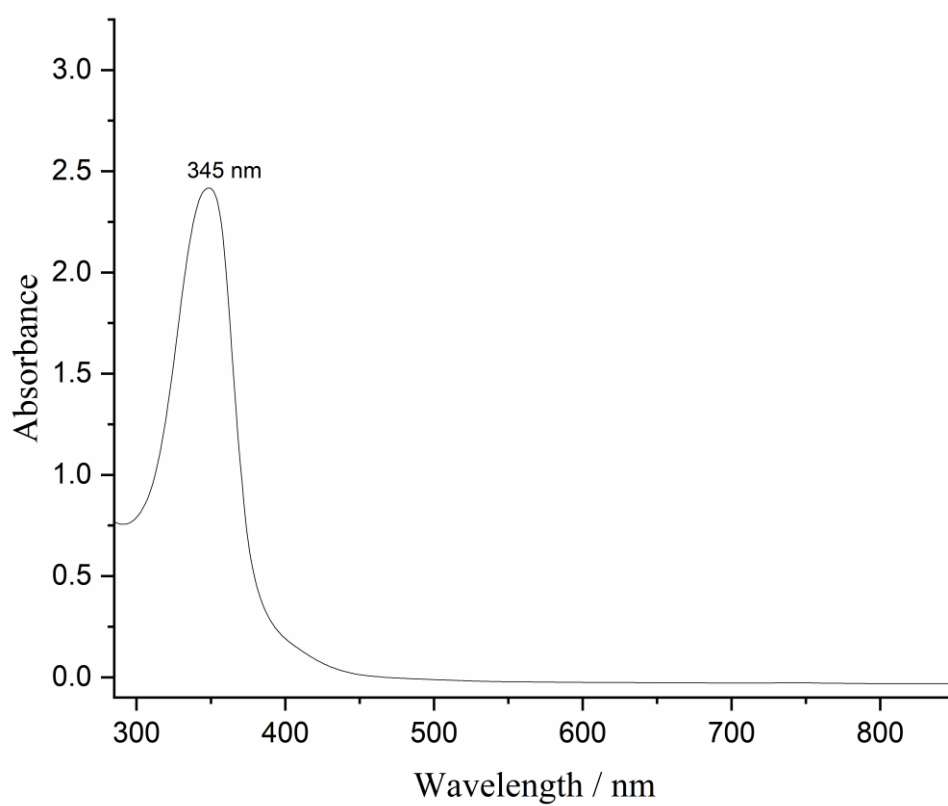

**Figure S40.** UV-visible spectrum of **6** ( $10^{-4}$  M) recorded in THF.

## 5. Computational Details

All calculations were performed by using the program package Gaussian 16<sup>[10]</sup>. The geometrical parameters of all stationary points were optimized by means of PBE<sup>[11]</sup> and PBE0<sup>[12]</sup> with the dispersion correction D3BJ<sup>[13]</sup>. As basis set def2-SVP<sup>[14]</sup> was employed. For all stationary points, no symmetry restriction was applied. Frequency calculations were carried out at each of the structures to verify the nature of the stationary point. It turned out that all transition states have exactly one imaginary frequency, whereas all other structures have none. Furthermore, the energies of the stationary points were calculated using the density functionals PBE0-D3BJ and PBE0-D3BJ with the basis set def2-TZVP<sup>[14]</sup>. To take solvent effects into account, the solvent model SMD<sup>[15]</sup> (THF and toluene as solvents) was used for the single-point calculations.

To simulate UV-visible spectra, the first 50 transitions were calculated using TD-PBE0-D3BJ(SMD,THF)/def2-SVP. The peak half-width at half-height was set to 0.15 eV to display the spectra.

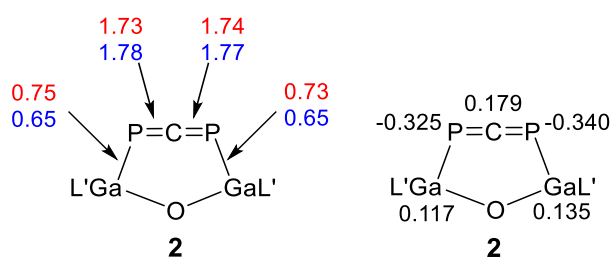

**Figure S41.** Mayer (red), Wiberg (blue) bond orders and NBO-charges (black) of compound **2** calculated by means of PBE0-D3BJ(SMD, toluene as solvent)/def2-TZVP//PBE0-D3BJ/def2-SVP. L' = HC[C(Me)NDipp]<sub>2</sub>, Dipp = 2,6-*i*-Pr<sub>2</sub>C<sub>6</sub>H<sub>3</sub>.

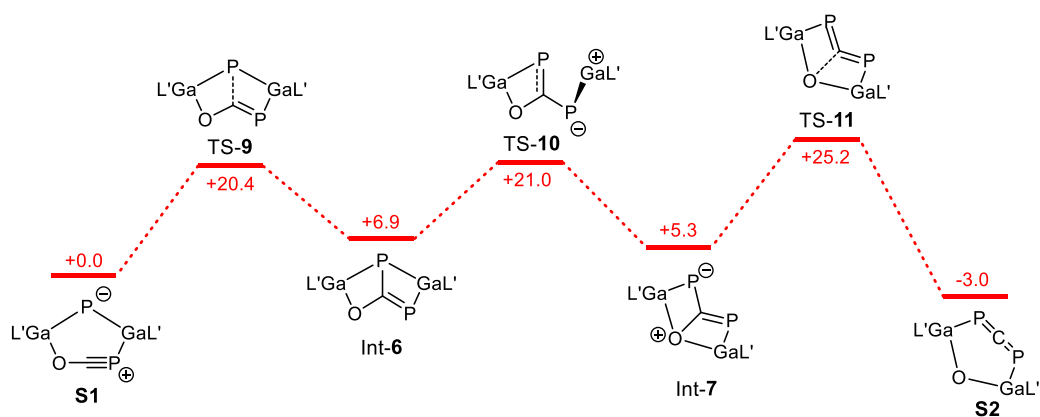

**Figure S42.** Gibbs energies (G) for the rearrangement from **S1** to **S2** calculated by means of PBE0-D3BJ(SMD,THF as solvent)/def2-TZVP//PBE0-D3BJ/def2-SVP.  $L' = HC[C(Me)NMe]_2$ . The values are given in kcal/mol.

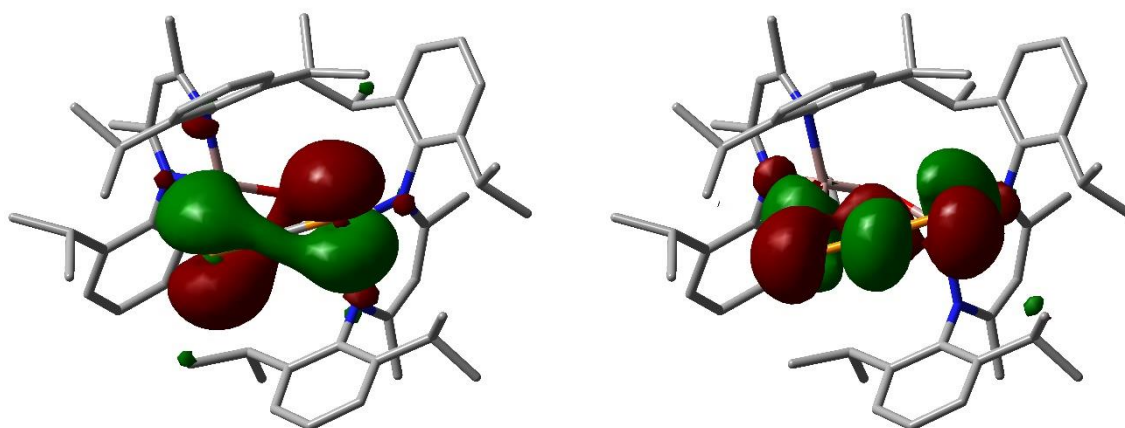

**Figure S43.** Occupied (left) and virtual (right) natural transition orbitals (isovalue = 0.030 au) for the transition  $\lambda_1$  of **2** calculated by means of TD-PBE0-D3BJ(SMD,THF)/def2-SVP level of theory (546.71 nm,  $f = 0.0042$ ). Hydrogen atoms are omitted for clarity.

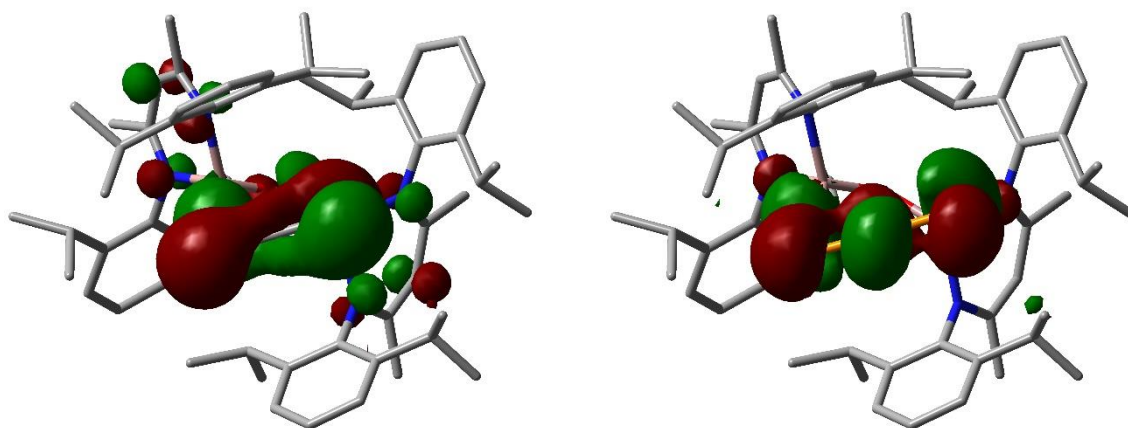

**Figure S44.** Occupied (left) and virtual (right) natural transition orbitals (isovalue = 0.030 au) for the transition  $\lambda_2$  of **2** calculated by means of TD-PBE0-D3BJ(SMD,THF)/def2-SVP level of theory (401.27 nm,  $f = 0.0048$ ). Hydrogen atoms are omitted for clarity.

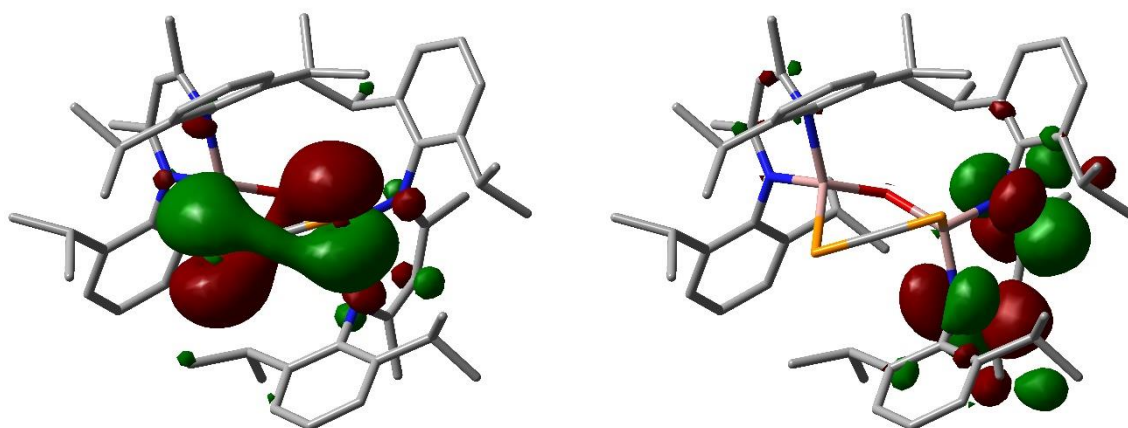

**Figure S45.** Occupied (left) and virtual (right) natural transition orbitals (isovalue = 0.030 au) for the transition  $\lambda_3$  of **2** calculated by means of TD-PBE0-D3BJ(SMD,THF)/def2-SVP level of theory (369.71 nm,  $f = 0.0277$ ). Hydrogen atoms are omitted for clarity.

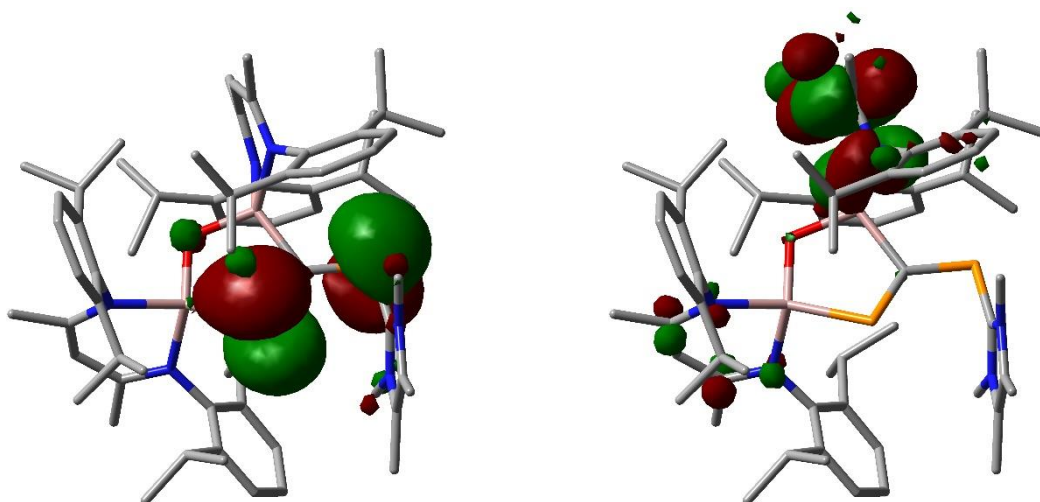

**Figure S46.** Occupied (left) and virtual (right) natural transition orbitals (isovalue = 0.030 au) for the transition  $\lambda_1$  of **3** calculated by means of TD-PBE0-D3BJ(SMD,THF)/def2-SVP level of theory (470.68 nm,  $f = 0.0050$ ). Hydrogen atoms are omitted for clarity.

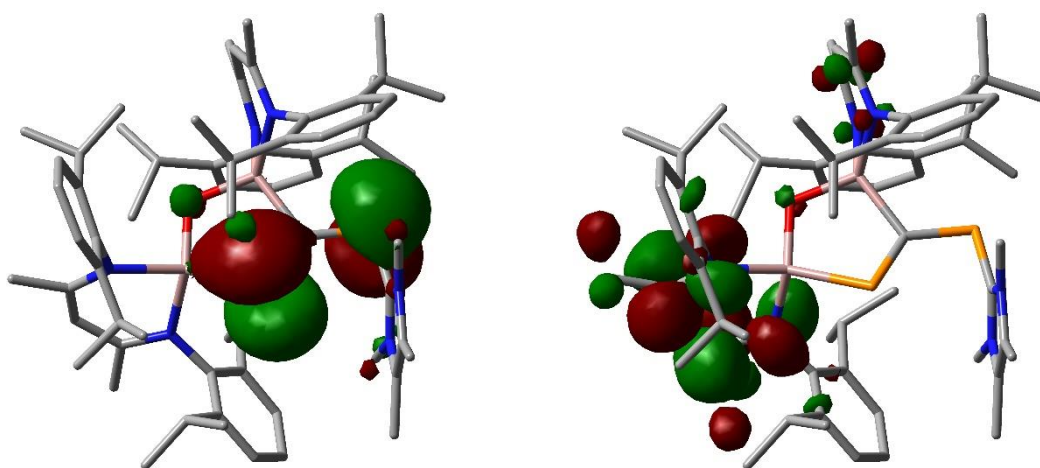

**Figure S47.** Occupied (left) and virtual (right) natural transition orbitals (isovalue = 0.030 au) for the transition  $\lambda_2$  of **3** calculated by means of TD-PBE0-D3BJ(SMD,THF)/def2-SVP level of theory (457.48 nm,  $f = 0.0005$ ). Hydrogen atoms are omitted for clarity.

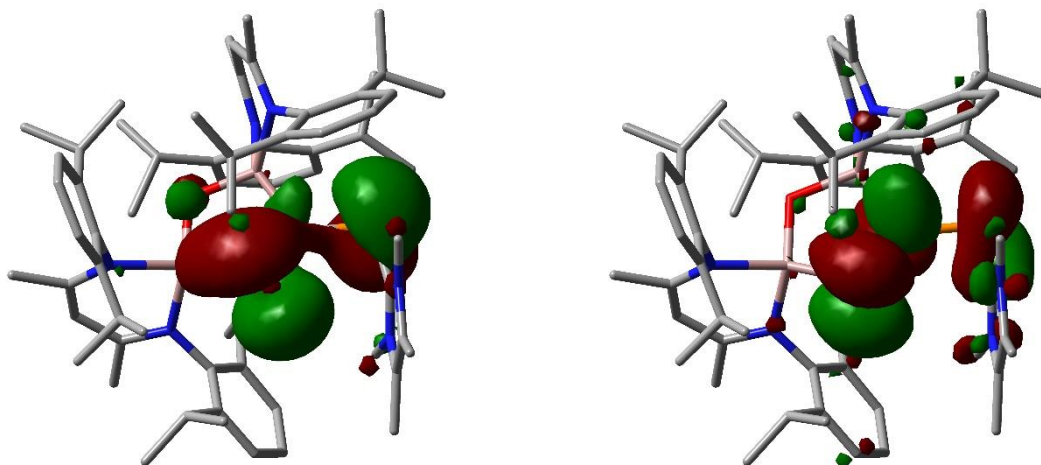

**Figure S48.** Occupied (left) and virtual (right) natural transition orbitals (isovalue = 0.030 au) for the transition  $\lambda_3$  of **3** calculated by means of TD-PBE0-D3BJ(SMD,THF)/def2-SVP level of theory (429.17 nm,  $f = 0.2010$ ). Hydrogen atoms are omitted for clarity.

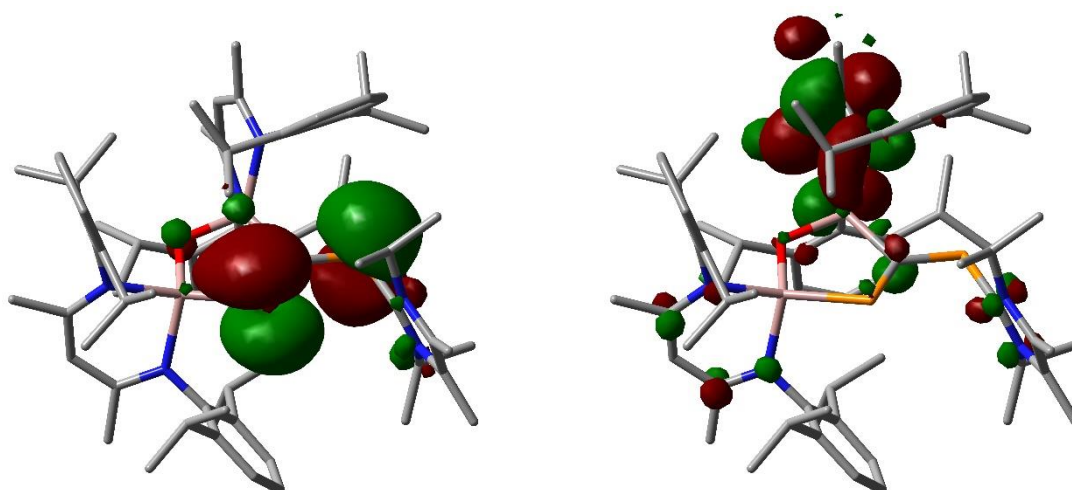

**Figure S49.** Occupied (left) and virtual (right) natural transition orbitals (isovalue = 0.030 au) for the transition  $\lambda_1$  of **4** calculated by means of TD-PBE0-D3BJ(SMD,THF)/def2-SVP level of theory (477.87 nm,  $f = 0.0262$ ). Hydrogen atoms are omitted for clarity.

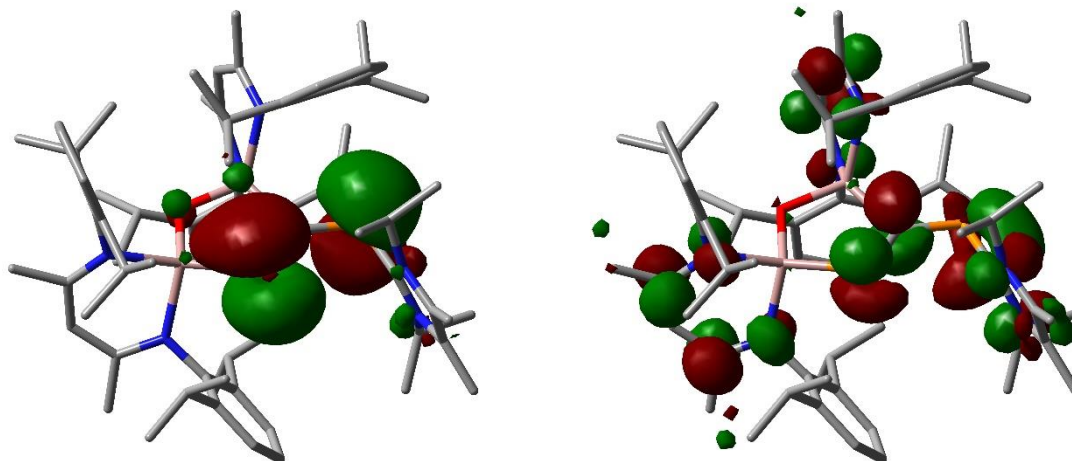

**Figure S50.** Occupied (left) and virtual (right) natural transition orbitals (isovalue = 0.030 au) for the transition  $\lambda_2$  of **4** calculated by means of TD-PBE0-D3BJ(SMD,THF)/def2-SVP level of theory (462.51 nm,  $f = 0.1202$ ). Hydrogen atoms are omitted for clarity.

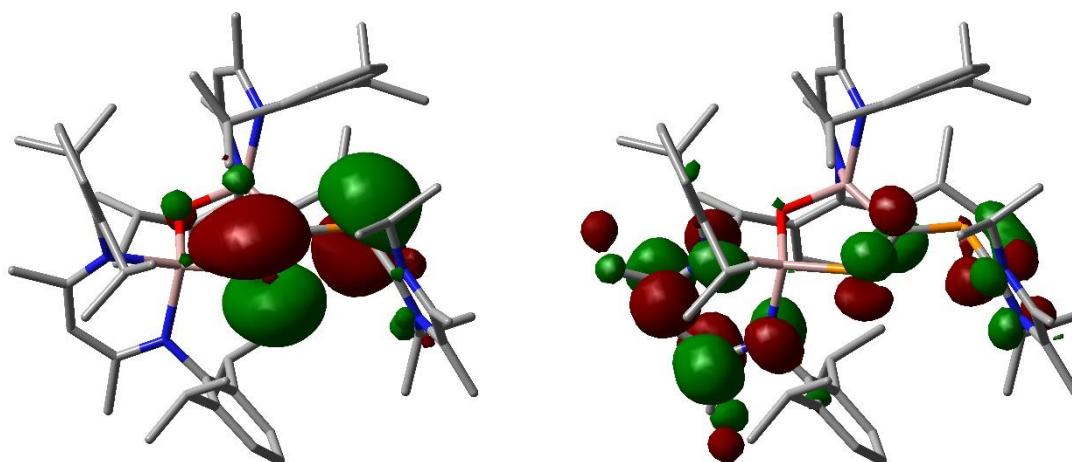

**Figure S51.** Occupied (left) and virtual (right) natural transition orbitals (isovalue = 0.030 au) for the transition  $\lambda_3$  of **4** calculated by means of TD-PBE0-D3BJ(SMD,THF)/def2-SVP level of theory (459.02 nm,  $f = 0.0575$ ). Hydrogen atoms are omitted for clarity.

## 6. Cartesian Coordinates and Absolute Energies for the Calculated Compound

**Table S3.** Absolute energies [au] of the calculated compounds by means of different methods.

| Compound | $E^a$        | $G^a$        | $E^b$        |
|----------|--------------|--------------|--------------|
| <b>1</b> | -7117.908404 | -7116.769972 | -7121.392846 |
| TS-1     | -7117.866524 | -7116.729604 | -7121.353648 |
| Int-1    | -7117.894501 | -7116.757053 | -7121.386668 |
| TS-2     | -7117.855555 | -7116.719799 | -7121.356677 |
| Int-2    | -7117.883697 | -7116.746984 | -7121.377373 |
| TS-3     | -7117.866957 | -7116.726851 | -7121.355707 |
| <b>2</b> | -7117.914977 | -7116.774319 | -7121.397577 |

<sup>a</sup> PBE-D3BJ/def2-SVP.

<sup>b</sup> PBE-D3BJ(THF as solvent)/def2-TZVP//PBE-D3BJ/def2-SVP

**Table S4.** Absolute energies [au] of the calculated compounds by means of different methods.

| Compound  | $E^a$        | $G^a$        | $E^b$        |
|-----------|--------------|--------------|--------------|
| <b>1</b>  | -7118.383810 | -7117.199557 | -7121.837100 |
| TS-1      | -7118.33785  | -7117.156071 | -7121.793403 |
| Int-1     | -7118.370812 | -7117.188198 | -7121.832377 |
| TS-2      | -7118.328072 | -7117.146251 | -7121.799760 |
| Int-2     | -7118.357969 | -7117.174100 | -7121.820931 |
| TS-3      | -7118.338231 | -7117.152670 | -7121.795936 |
| <b>2</b>  | -7118.390575 | -7117.204999 | -7121.841793 |
| <b>S1</b> | -5410.974588 | -5410.635437 | -5412.666189 |
| TS-9      | -5410.932166 | -5410.591637 | -5412.634995 |
| Int-6     | -5410.956915 | -5410.615872 | -5412.657039 |
| TS-10     | -5410.926627 | -5410.585439 | -5412.634847 |
| Int-7     | -5410.958180 | -5410.617989 | -5412.658837 |
| TS-11     | -5410.926917 | -5410.591865 | -5412.621926 |
| <b>S2</b> | -5410.978546 | -5410.639840 | -5412.670553 |

<sup>a</sup> PBE0-D3BJ/def2-SVP.

<sup>b</sup> PBE0-D3BJ(THF as solvent)/def2-TZVP//PBE0-D3BJ/def2-SVP

**Table S5.** Absolute energies [au] of the calculated compounds by means of different methods.

| Compound            | $E^a$        | $G^a$        | $E^b$        |
|---------------------|--------------|--------------|--------------|
| <b>2</b>            | -7118.390575 | -7117.204999 | -7121.841793 |
| TMSCHN <sub>2</sub> | -556.713335  | -556.614042  | -557.112765  |
| N <sub>2</sub>      | -109.315467  | -109.328140  | -109.441044  |
| TS-4                | -7675.100069 | -7673.791680 | -7678.945449 |
| Int-3               | -7675.113130 | -7673.803293 | -7678.958043 |
| TS-5                | -7675.107953 | -7673.798597 | -7678.951540 |
| Int-4               | -7565.852469 | -7564.549691 | -7569.574901 |
| TS-8                | -7565.831909 | -7564.528176 | -7569.554346 |
| <b>6</b>            | -7565.878492 | -7564.570738 | -7569.600731 |
| TS-6                | -7675.109948 | -7673.799508 | -7678.953727 |
| Int-5               | -7675.156428 | -7673.842386 | -7679.004713 |
| TS-7                | -7675.135037 | -7673.824409 | -7678.982819 |

<sup>a</sup> PBE0-D3BJ/def2-SVP.

<sup>b</sup> PBE0-D3BJ(toluene as solvent)/def2-TZVP//PBE0-D3BJ/def2-SVP

Cartesian coordinates of the optimized geometry of **1** at PBE-D3BJ/def2-SVP level of theory:

|    |             |             |             |
|----|-------------|-------------|-------------|
| Ga | -1.67106500 | -0.08630200 | 0.64400000  |
| Ga | 1.66044500  | 0.10023300  | -0.47706500 |
| P  | 0.42763800  | 0.04980700  | 1.41695400  |



|   |             |             |             |
|---|-------------|-------------|-------------|
| P | 0.80342000  | 0.13140200  | -2.92384800 |
| O | -1.64242800 | -0.14097700 | -1.50360100 |
| C | -0.60694000 | -0.02404700 | -2.13674400 |
| N | -3.10956900 | 1.29443700  | 0.88373100  |
| N | -2.93116300 | -1.61381000 | 0.95313100  |
| N | 2.93737800  | 1.64028600  | -0.74925800 |
| N | 3.08201200  | -1.28932600 | -0.84020900 |
| C | -4.21465000 | 1.05188600  | 1.61903400  |
| C | -4.59272600 | -0.23036800 | 2.06508400  |
| H | -5.48936300 | -0.26992600 | 2.69509100  |
| C | -4.05201100 | -1.47624200 | 1.69163800  |
| C | -5.12559800 | 2.19928100  | 1.98976400  |
| H | -6.02569100 | 1.83329800  | 2.51441300  |
| H | -5.43630700 | 2.77512600  | 1.09707100  |
| H | -4.59797300 | 2.91906800  | 2.64537300  |
| C | -4.79753000 | -2.71044900 | 2.14394600  |
| H | -5.72636100 | -2.43736600 | 2.67504900  |
| H | -4.16415000 | -3.31746900 | 2.81995100  |
| H | -5.04913800 | -3.37036500 | 1.29192100  |
| C | -2.95237900 | 2.62345300  | 0.35154800  |
| C | -2.32964800 | 3.63955800  | 1.12555300  |
| C | -2.30351200 | 4.94740900  | 0.60270100  |
| H | -1.82425200 | 5.74643500  | 1.18867900  |
| C | -2.88019500 | 5.25045800  | -0.63485400 |
| H | -2.86168600 | 6.28321600  | -1.01533600 |
| C | -3.46233500 | 4.23121000  | -1.39789100 |
| H | -3.89594800 | 4.46834700  | -2.38123100 |
| C | -3.50079900 | 2.90434600  | -0.93223500 |
| C | -1.70985700 | 3.37443800  | 2.49367000  |
| H | -1.87539700 | 2.30512800  | 2.73786900  |
| C | -2.35275200 | 4.22716200  | 3.60315700  |
| H | -3.45258800 | 4.09862400  | 3.66204100  |
| H | -2.15556500 | 5.30785000  | 3.44651200  |
| H | -1.92816300 | 3.95457500  | 4.59071700  |
| C | -0.19367600 | 3.60945000  | 2.45863000  |
| H | 0.25192100  | 3.40330400  | 3.45355600  |
| H | 0.04730700  | 4.65771600  | 2.19201100  |
| H | 0.29654200  | 2.93605600  | 1.72922500  |
| C | -4.15639100 | 1.82074400  | -1.78431000 |
| H | -3.87591400 | 0.84574300  | -1.34315700 |
| C | -5.69270100 | 1.91089800  | -1.75072600 |
| H | -6.14204800 | 1.11024600  | -2.37442300 |
| H | -6.04636000 | 2.88643400  | -2.14529800 |
| H | -6.09181800 | 1.79582500  | -0.72408500 |
| C | -3.64208800 | 1.83256800  | -3.23215400 |
| H | -4.03468400 | 0.95578500  | -3.78622400 |
| H | -2.53655800 | 1.79230900  | -3.27032500 |
| H | -3.96936400 | 2.74059800  | -3.77981300 |
| C | -2.63278700 | -2.92721400 | 0.44549700  |
| C | -1.84183100 | -3.83369900 | 1.20077800  |
| C | -1.67129900 | -5.13897000 | 0.69781300  |
| H | -1.05993600 | -5.85443900 | 1.26866900  |
| C | -2.27067900 | -5.54422800 | -0.49910400 |
| H | -2.13739400 | -6.57471100 | -0.86258000 |
| C | -3.02449500 | -4.62879800 | -1.24417900 |
| H | -3.47607500 | -4.94452600 | -2.19700300 |
| C | -3.20885300 | -3.30690000 | -0.80089100 |
| C | -1.19801500 | -3.45784700 | 2.53128400  |
| H | -1.45306000 | -2.39891100 | 2.74112600  |
| C | -1.71894800 | -4.32126600 | 3.69521500  |
| H | -2.82174100 | -4.27957100 | 3.80184900  |
| H | -1.27499800 | -3.98192800 | 4.65318900  |
| H | -1.44123600 | -5.38729100 | 3.56071100  |
| C | 0.33106800  | -3.55297700 | 2.44895200  |
| H | 0.79053800  | -3.23323400 | 3.40624100  |
| H | 0.72744200  | -2.89143500 | 1.65540700  |
| H | 0.66250100  | -4.59051400 | 2.24474900  |
| C | -4.03883700 | -2.33369500 | -1.63537900 |

|   |             |             |             |
|---|-------------|-------------|-------------|
| H | -3.87509100 | -1.32302800 | -1.21481500 |
| C | -5.54656100 | -2.62950400 | -1.53993300 |
| H | -5.77978100 | -3.64865000 | -1.91331300 |
| H | -6.12295300 | -1.90485200 | -2.15179500 |
| H | -5.91910500 | -2.55643300 | -0.49980000 |
| C | -3.58690400 | -2.29714800 | -3.10335200 |
| H | -3.78845900 | -3.25710300 | -3.62224100 |
| H | -2.50465800 | -2.08362400 | -3.18633300 |
| H | -4.13501900 | -1.50527400 | -3.65357500 |
| C | 3.98735100  | 1.52160600  | -1.58148400 |
| C | 4.43605000  | 0.28634300  | -2.10190700 |
| H | 5.27500000  | 0.34947800  | -2.80568800 |
| C | 4.10907200  | -1.01619800 | -1.66488600 |
| C | 4.78098700  | 2.75176000  | -1.95984600 |
| H | 5.10013900  | 3.30755200  | -1.05606300 |
| H | 4.16398200  | 3.45608200  | -2.55141000 |
| H | 5.67391400  | 2.47951000  | -2.54990800 |
| C | 5.01416800  | -2.14008100 | -2.11419300 |
| H | 5.49478200  | -2.62495400 | -1.24089000 |
| H | 5.80167800  | -1.76794900 | -2.79308400 |
| H | 4.43931600  | -2.93598300 | -2.62611100 |
| C | 2.68457200  | 2.92399000  | -0.15309500 |
| C | 3.14349900  | 3.15945200  | 1.17239700  |
| C | 3.01790100  | 4.45718500  | 1.70024800  |
| H | 3.38083400  | 4.66185700  | 2.71743800  |
| C | 2.42580000  | 5.48831700  | 0.96128600  |
| H | 2.34016800  | 6.49741000  | 1.39263300  |
| C | 1.91340900  | 5.22155800  | -0.31191700 |
| H | 1.40968000  | 6.02187500  | -0.87486800 |
| C | 2.02913600  | 3.94428900  | -0.89282000 |
| C | 3.77117600  | 2.04198600  | 1.99730900  |
| H | 3.29545800  | 1.09725600  | 1.65912300  |
| C | 5.28339300  | 1.91999800  | 1.73777700  |
| H | 5.72281800  | 1.11283600  | 2.35923600  |
| H | 5.80469100  | 2.86639000  | 1.99237800  |
| H | 5.50416600  | 1.68071700  | 0.67930200  |
| C | 3.47637600  | 2.17313400  | 3.49657500  |
| H | 2.38759900  | 2.25945800  | 3.68017200  |
| H | 3.98143700  | 3.05162700  | 3.94882500  |
| H | 3.84122400  | 1.27724000  | 4.03587800  |
| C | 1.40412900  | 3.67921100  | -2.25520000 |
| H | 1.77489600  | 2.69795800  | -2.61579000 |
| C | 1.76281900  | 4.73453400  | -3.31272000 |
| H | 1.35809600  | 4.43788400  | -4.30163500 |
| H | 2.85907100  | 4.86676300  | -3.41970600 |
| H | 1.33131900  | 5.72697700  | -3.06769300 |
| C | -0.11909100 | 3.55612800  | -2.10490400 |
| H | -0.39105200 | 2.79931900  | -1.34321500 |
| H | -0.58899200 | 3.26022400  | -3.06454700 |
| H | -0.56379400 | 4.51798700  | -1.78358000 |
| C | 2.98344800  | -2.61660400 | -0.29480900 |
| C | 3.59895000  | -2.88707400 | 0.95708800  |
| C | 3.56538000  | -4.20386700 | 1.45179000  |
| H | 4.04491800  | -4.42591000 | 2.41764500  |
| C | 2.93090900  | -5.22972900 | 0.74350900  |
| H | 2.91398500  | -6.25338600 | 1.14787500  |
| C | 2.30536800  | -4.94340500 | -0.47452700 |
| H | 1.79123000  | -5.74633400 | -1.02437500 |
| C | 2.32427800  | -3.64589300 | -1.01979100 |
| C | 4.30309300  | -1.80271500 | 1.76252300  |
| H | 4.19672600  | -0.85300600 | 1.20166500  |
| C | 5.80836900  | -2.08803700 | 1.90116000  |
| H | 6.31513300  | -1.26308000 | 2.44289200  |
| H | 6.29801300  | -2.19299400 | 0.91181800  |
| H | 5.99409600  | -3.02382900 | 2.46814300  |
| C | 3.63562700  | -1.60824600 | 3.13338700  |
| H | 2.57660800  | -1.30087400 | 3.01650200  |
| H | 4.16324500  | -0.82526900 | 3.71471100  |

|   |             |             |             |
|---|-------------|-------------|-------------|
| H | 3.66180700  | -2.54127700 | 3.73361200  |
| C | 1.63014200  | -3.38014200 | -2.34718500 |
| H | 1.89795400  | -2.35298400 | -2.66848400 |
| C | 2.06641500  | -4.34685200 | -3.45959900 |
| H | 1.75346200  | -5.38972500 | -3.24566000 |
| H | 3.16669300  | -4.35254600 | -3.60076300 |
| H | 1.60207400  | -4.05563800 | -4.42376000 |
| C | 0.10759400  | -3.41125300 | -2.16307400 |
| H | -0.24039400 | -4.42505900 | -1.88473000 |
| H | -0.40824500 | -3.11339800 | -3.09807700 |
| H | -0.21736900 | -2.72393400 | -1.35805700 |

Cartesian coordinates of the optimized geometry of **2** at PBE-D3BJ/def2-SVP level of theory:

|    |             |             |             |
|----|-------------|-------------|-------------|
| Ga | -1.58141200 | -0.23385100 | -0.05217900 |
| Ga | 1.58123800  | 0.23394800  | -0.05203400 |
| P  | -1.45757000 | 0.80615600  | -2.20050900 |
| P  | 1.45828600  | -0.80672900 | -2.20017300 |
| O  | -0.00004500 | -0.00033000 | 0.84618800  |
| N  | -2.38483200 | -2.06490000 | -0.21202300 |
| N  | -2.88344000 | 0.43598500  | 1.29831200  |
| N  | 2.38451500  | 2.06500300  | -0.21195200 |
| N  | 2.88348300  | -0.43588000 | 1.29834100  |
| C  | -3.21414800 | -2.54779000 | 0.72921100  |
| C  | -3.65635200 | -1.80648000 | 1.84716100  |
| H  | -4.26689700 | -2.36612300 | 2.56744100  |
| C  | -3.58755700 | -0.41522500 | 2.06714700  |
| C  | -3.78428100 | -3.94682400 | 0.61138300  |
| H  | -4.88090200 | -3.89590500 | 0.46003500  |
| H  | -3.61877400 | -4.49334600 | 1.56093200  |
| H  | -3.34386700 | -4.52292200 | -0.21956700 |
| C  | -4.38997100 | 0.13364600  | 3.22510800  |
| H  | -5.02066200 | 0.98698900  | 2.90898500  |
| H  | -3.71726100 | 0.52406000  | 4.01305300  |
| H  | -5.03284300 | -0.64828600 | 3.66634500  |
| C  | -2.25980800 | -2.75988600 | -1.46708800 |
| C  | -3.26744400 | -2.57278100 | -2.45437000 |
| C  | -3.14402800 | -3.26721300 | -3.67247100 |
| H  | -3.91588100 | -3.13597000 | -4.44626000 |
| C  | -2.05882700 | -4.11279100 | -3.91621800 |
| H  | -1.97795000 | -4.64722900 | -4.87500300 |
| C  | -1.06632700 | -4.26857700 | -2.94164700 |
| H  | -0.20979100 | -4.92382200 | -3.14942300 |
| C  | -1.13664000 | -3.59962400 | -1.70513500 |
| C  | -4.47989700 | -1.66922800 | -2.23973200 |
| H  | -4.32729500 | -1.11953200 | -1.28884100 |
| C  | -5.77964300 | -2.48456600 | -2.10598400 |
| H  | -6.63717100 | -1.81820600 | -1.87804100 |
| H  | -5.71533400 | -3.24511000 | -1.30496100 |
| H  | -6.01052900 | -3.01845000 | -3.05121200 |
| C  | -4.62891700 | -0.62554100 | -3.35875600 |
| H  | -4.83708100 | -1.10366900 | -4.33789600 |
| H  | -3.70913100 | -0.01644900 | -3.46389400 |
| H  | -5.47603200 | 0.05648600  | -3.13991500 |
| C  | -0.04778900 | -3.80434400 | -0.65416700 |
| H  | 0.12524600  | -2.81596400 | -0.17296600 |
| C  | -0.46787200 | -4.79141100 | 0.45165700  |
| H  | -1.31414000 | -4.42006200 | 1.05454700  |
| H  | 0.38072600  | -4.95817200 | 1.14496500  |
| H  | -0.75468800 | -5.77063600 | 0.01460400  |
| C  | 1.28521800  | -4.26698900 | -1.25240700 |
| H  | 1.60469600  | -3.60928500 | -2.08484300 |
| H  | 1.22662800  | -5.31029000 | -1.62743900 |
| H  | 2.06941200  | -4.24344200 | -0.47332000 |
| C  | -3.00340400 | 1.84540000  | 1.53786300  |
| C  | -3.93214700 | 2.58177900  | 0.74808400  |

|   |             |             |             |
|---|-------------|-------------|-------------|
| C | -4.13373400 | 3.94048300  | 1.05242300  |
| H | -4.85558800 | 4.52446200  | 0.46375100  |
| C | -3.41705000 | 4.56643300  | 2.08089900  |
| H | -3.58959800 | 5.63021300  | 2.30427200  |
| C | -2.46260000 | 3.84249700  | 2.80310400  |
| H | -1.88021700 | 4.34689900  | 3.58971000  |
| C | -2.23012000 | 2.47544600  | 2.55183900  |
| C | -4.68921000 | 1.91456600  | -0.39848800 |
| H | -4.02199600 | 1.12138300  | -0.79768300 |
| C | -5.97767900 | 1.21710000  | 0.07534000  |
| H | -6.66382100 | 1.94133400  | 0.56197500  |
| H | -5.77035400 | 0.40144300  | 0.79375700  |
| H | -6.51321600 | 0.76904700  | -0.78712300 |
| C | -4.98950500 | 2.87356100  | -1.55820400 |
| H | -4.07735600 | 3.40529000  | -1.89197500 |
| H | -5.75261900 | 3.63194500  | -1.28591700 |
| H | -5.38837900 | 2.30769400  | -2.42325800 |
| C | -1.16585100 | 1.73580400  | 3.35880300  |
| H | -1.16276900 | 0.68210400  | 3.01821100  |
| C | -1.43308200 | 1.77352000  | 4.87398500  |
| H | -1.35804000 | 2.80548200  | 5.27565400  |
| H | -0.68273800 | 1.15629400  | 5.41004200  |
| H | -2.43739200 | 1.38966700  | 5.14368200  |
| C | 0.23567100  | 2.29326500  | 3.06292700  |
| H | 0.46540500  | 2.21568200  | 1.98625000  |
| H | 1.00638800  | 1.71237900  | 3.60908800  |
| H | 0.32882900  | 3.35425700  | 3.37491300  |
| C | 3.21405000  | 2.54787000  | 0.72913500  |
| C | 3.65649500  | 1.80658700  | 1.84698600  |
| H | 4.26717500  | 2.36623100  | 2.56715000  |
| C | 3.58780100  | 0.41530900  | 2.06695900  |
| C | 3.78401400  | 3.94696800  | 0.61123900  |
| H | 4.88061700  | 3.89619000  | 0.45973000  |
| H | 3.61858800  | 4.49343600  | 1.56083800  |
| H | 3.34338100  | 4.52303400  | -0.21961400 |
| C | 4.39052100  | -0.13358200 | 3.22471800  |
| H | 5.02170800  | -0.98642200 | 2.90822700  |
| H | 3.71802200  | -0.52477400 | 4.01244600  |
| H | 5.03292500  | 0.64853100  | 3.66631200  |
| C | 2.25952500  | 2.75985600  | -1.46710600 |
| C | 3.26734400  | 2.57295100  | -2.45423700 |
| C | 3.14388600  | 3.26723400  | -3.67242600 |
| H | 3.91589700  | 3.13615600  | -4.44608500 |
| C | 2.05846300  | 4.11244400  | -3.91642000 |
| H | 1.97753300  | 4.64672800  | -4.87528600 |
| C | 1.06580500  | 4.26807200  | -2.94198200 |
| H | 0.20911500  | 4.92305500  | -3.14994600 |
| C | 1.13618500  | 3.59932200  | -1.70537100 |
| C | 4.48000700  | 1.66971600  | -2.23945100 |
| H | 4.32758800  | 1.12018900  | -1.28843100 |
| C | 5.77962500  | 2.48531800  | -2.10597800 |
| H | 6.01058300  | 3.01869400  | -3.05147500 |
| H | 6.63720300  | 1.81918400  | -1.87755800 |
| H | 5.71511500  | 3.24631600  | -1.30540300 |
| C | 4.62919100  | 0.62584200  | -3.35827200 |
| H | 3.70959300  | 0.01642600  | -3.46316600 |
| H | 5.47657400  | -0.05584700 | -3.13943100 |
| H | 4.83702400  | 1.10385700  | -4.33753800 |
| C | 0.04729300  | 3.80406500  | -0.65445300 |
| H | -0.12572300 | 2.81571500  | -0.17318200 |
| C | 0.46736000  | 4.79122300  | 0.45129700  |
| H | 0.75400400  | 5.77046600  | 0.01417500  |
| H | 1.31373500  | 4.41999300  | 1.05411000  |
| H | -0.38118400 | 4.95790200  | 1.14469000  |
| C | -1.28571500 | 4.26662400  | -1.25273900 |
| H | -1.22709400 | 5.30982900  | -1.62802600 |
| H | -2.06986400 | 4.24329200  | -0.47360400 |
| H | -1.60527000 | 3.60874000  | -2.08500700 |

|   |             |             |             |
|---|-------------|-------------|-------------|
| C | 3.00349400  | -1.84529400 | 1.53775800  |
| C | 3.93225100  | -2.58155100 | 0.74786600  |
| C | 4.13392700  | -3.94026800 | 1.05207300  |
| H | 4.85583900  | -4.52413100 | 0.46335000  |
| C | 3.41725300  | -4.56636700 | 2.08046900  |
| H | 3.58984900  | -5.63016000 | 2.30374100  |
| C | 2.46275700  | -3.84255800 | 2.80274500  |
| H | 1.88039100  | -4.34708500 | 3.58928700  |
| C | 2.23023800  | -2.47547900 | 2.55166900  |
| C | 4.68923100  | -1.91420400 | -0.39865800 |
| H | 4.02223000  | -1.12060300 | -0.79734400 |
| C | 5.97815000  | -1.21743300 | 0.07493700  |
| H | 6.51343200  | -0.76912300 | -0.78755200 |
| H | 6.66428000  | -1.94213600 | 0.56090100  |
| H | 5.77146000  | -0.40206500 | 0.79387100  |
| C | 4.98873400  | -2.87294100 | -1.55881300 |
| H | 4.07619200  | -3.40397000 | -1.89261200 |
| H | 5.75143200  | -3.63189200 | -1.28694500 |
| H | 5.38778100  | -2.30697600 | -2.42371800 |
| C | 1.16605700  | -1.73590800 | 3.35881900  |
| H | 1.16281200  | -0.68223200 | 3.01816300  |
| C | 1.43365500  | -1.77352900 | 4.87395000  |
| H | 2.43786900  | -1.38927500 | 5.14341600  |
| H | 1.35910200  | -2.80553100 | 5.27561000  |
| H | 0.68319900  | -1.15658500 | 5.41017600  |
| C | -0.23548000 | -2.29348100 | 3.06330500  |
| H | -1.00608600 | -1.71271600 | 3.60975500  |
| H | -0.32849500 | -3.35451300 | 3.37521000  |
| H | -0.46555000 | -2.21579200 | 1.98670700  |
| C | 0.00036700  | -0.00030500 | -2.22961900 |

Cartesian coordinates of the optimized geometry of Int-1 at PBE-D3BJ/def2-SVP level of theory:

|    |             |             |             |
|----|-------------|-------------|-------------|
| Ga | -2.06624100 | 0.56173400  | -0.31921400 |
| Ga | 2.20735400  | -0.68142400 | -0.62604600 |
| P  | -0.13907900 | -0.68507100 | 0.04921400  |
| P  | 1.25339700  | -0.60440400 | -2.74829400 |
| O  | -1.29742600 | 0.33795500  | -2.14173700 |
| N  | -2.93089700 | 2.29449600  | -0.05281700 |
| N  | -3.73325100 | -0.50480100 | -0.51488600 |
| N  | 2.95754500  | -2.25307300 | 0.36195800  |
| N  | 3.73621400  | 0.52614100  | -0.18398500 |
| C  | -4.23791200 | 2.49467500  | -0.34023100 |
| C  | -5.14139500 | 1.46691100  | -0.66081000 |
| H  | -6.16979300 | 1.79042500  | -0.86634800 |
| C  | -4.93246300 | 0.06305000  | -0.68108100 |
| C  | -4.76757400 | 3.90804400  | -0.28387100 |
| H  | -5.80674300 | 3.95742600  | -0.65467800 |
| H  | -4.13031800 | 4.58666300  | -0.88521900 |
| H  | -4.74191100 | 4.30153100  | 0.75248900  |
| C  | -6.15208700 | -0.79752000 | -0.91275700 |
| H  | -6.00478200 | -1.83015600 | -0.54790500 |
| H  | -6.36606400 | -0.85552800 | -1.99973900 |
| H  | -7.03948100 | -0.35252300 | -0.42481100 |
| C  | -2.14904700 | 3.36979600  | 0.49025400  |
| C  | -2.27386600 | 3.67151100  | 1.87609400  |
| C  | -1.51254300 | 4.73405600  | 2.39325700  |
| H  | -1.59353000 | 4.98803900  | 3.46045100  |
| C  | -0.63983500 | 5.46407300  | 1.57428000  |
| H  | -0.04925400 | 6.28998800  | 1.99983500  |
| C  | -0.50922000 | 5.13344600  | 0.22189100  |
| H  | 0.19243800  | 5.69519400  | -0.41283000 |
| C  | -1.26163000 | 4.08834100  | -0.34985300 |
| C  | -3.15557200 | 2.82238400  | 2.78788900  |
| H  | -3.93119700 | 2.34330900  | 2.15676500  |
| C  | -3.88705900 | 3.63581600  | 3.86425400  |

|   |             |             |             |
|---|-------------|-------------|-------------|
| H | -4.59345200 | 2.98819900  | 4.42196100  |
| H | -4.46484600 | 4.47337600  | 3.42320800  |
| H | -3.18586200 | 4.06595500  | 4.60868100  |
| C | -2.32937000 | 1.68519600  | 3.41860800  |
| H | -1.55843200 | 2.09304800  | 4.10385400  |
| H | -1.79909700 | 1.09016900  | 2.64707400  |
| H | -2.97924100 | 0.99790000  | 3.99851000  |
| C | -1.11041100 | 3.75580100  | -1.82761600 |
| H | -1.80837700 | 2.92762000  | -2.06015100 |
| C | -1.49459900 | 4.94663700  | -2.72194900 |
| H | -2.52967400 | 5.29456500  | -2.52531600 |
| H | -1.42797500 | 4.66230000  | -3.79176000 |
| H | -0.81549900 | 5.81025900  | -2.56389300 |
| C | 0.30644300  | 3.25176800  | -2.14101000 |
| H | 0.59902400  | 2.41612300  | -1.47564900 |
| H | 1.06193000  | 4.05355500  | -2.01924900 |
| H | 0.36261500  | 2.87474100  | -3.18097900 |
| C | -3.54831400 | -1.92990400 | -0.52429000 |
| C | -3.32604600 | -2.57526000 | 0.72489600  |
| C | -3.09131800 | -3.96004600 | 0.72851300  |
| H | -2.90786600 | -4.47513500 | 1.68152900  |
| C | -3.06513700 | -4.69002700 | -0.46611300 |
| H | -2.87431100 | -5.77384700 | -0.44525200 |
| C | -3.25748400 | -4.03546700 | -1.68537000 |
| H | -3.20825500 | -4.61007500 | -2.62279600 |
| C | -3.49080500 | -2.64725300 | -1.74891900 |
| C | -3.35602400 | -1.78049500 | 2.02463700  |
| H | -2.95892500 | -0.76919300 | 1.78792700  |
| C | -4.79341800 | -1.58927500 | 2.54035700  |
| H | -5.25866900 | -2.56978000 | 2.77265300  |
| H | -5.43656000 | -1.07813900 | 1.79803500  |
| H | -4.79962500 | -0.98008800 | 3.46821800  |
| C | -2.44923200 | -2.36450800 | 3.11206200  |
| H | -1.43308500 | -2.56087000 | 2.71943300  |
| H | -2.85048600 | -3.31545800 | 3.52064500  |
| H | -2.36476000 | -1.65597100 | 3.96094900  |
| C | -3.65176000 | -1.98669500 | -3.11452500 |
| H | -3.79191800 | -0.89924500 | -2.95165900 |
| C | -4.88184700 | -2.53225200 | -3.86485700 |
| H | -4.74465500 | -3.60119600 | -4.12976600 |
| H | -5.03837100 | -1.97562600 | -4.81149800 |
| H | -5.81053000 | -2.46088500 | -3.26499600 |
| C | -2.38868100 | -2.15432600 | -3.97761100 |
| H | -1.49467400 | -1.73653300 | -3.48069400 |
| H | -2.51436300 | -1.62608900 | -4.94479400 |
| H | -2.19364600 | -3.22345400 | -4.20247600 |
| C | 4.27898100  | -2.39052900 | 0.56276400  |
| C | 5.20380500  | -1.33995900 | 0.37741700  |
| H | 6.25415800  | -1.59509100 | 0.56533000  |
| C | 4.94267000  | 0.03169400  | 0.15252100  |
| C | 4.80939900  | -3.71448300 | 1.06124700  |
| H | 4.48583800  | -3.90308500 | 2.10403900  |
| H | 5.91337700  | -3.73916900 | 1.02594400  |
| H | 4.40150400  | -4.54948200 | 0.45865200  |
| C | 6.10620800  | 0.98261400  | 0.31721100  |
| H | 5.81642900  | 1.87270800  | 0.90827700  |
| H | 6.44376100  | 1.36118600  | -0.66784600 |
| H | 6.95868700  | 0.48060700  | 0.80808700  |
| C | 2.05531300  | -3.22591700 | 0.90796700  |
| C | 1.73796600  | -3.15325900 | 2.29425900  |
| C | 0.87529500  | -4.12390800 | 2.83442900  |
| H | 0.62641600  | -4.08506200 | 3.90647800  |
| C | 0.31548500  | -5.12487600 | 2.03149200  |
| H | -0.35849400 | -5.87529500 | 2.47250800  |
| C | 0.60040300  | -5.15272300 | 0.66274300  |
| H | 0.13622100  | -5.92150200 | 0.02666900  |
| C | 1.46347600  | -4.20977400 | 0.07320700  |
| C | 2.25723000  | -2.03318900 | 3.19246500  |

|   |             |             |             |
|---|-------------|-------------|-------------|
| H | 2.90517700  | -1.37827800 | 2.57670100  |
| C | 3.10656900  | -2.55826300 | 4.36243300  |
| H | 2.50684200  | -3.19586500 | 5.04467800  |
| H | 3.50854000  | -1.71506600 | 4.96109400  |
| H | 3.96710900  | -3.16248000 | 4.01213900  |
| C | 1.09560300  | -1.16835000 | 3.71222300  |
| H | 0.50066800  | -0.75266800 | 2.87462700  |
| H | 1.47958400  | -0.32281900 | 4.31833600  |
| H | 0.40948200  | -1.75609300 | 4.35558500  |
| C | 1.72491700  | -4.26652200 | -1.42589000 |
| H | 2.31040200  | -3.36406200 | -1.69638600 |
| C | 2.55663800  | -5.50149800 | -1.81301400 |
| H | 2.01930100  | -6.44129900 | -1.56662100 |
| H | 3.53142200  | -5.52708300 | -1.28437100 |
| H | 2.76268000  | -5.50748100 | -2.90300800 |
| C | 0.41222500  | -4.20268000 | -2.22106600 |
| H | -0.20153300 | -5.11602000 | -2.07458800 |
| H | 0.62177500  | -4.10030800 | -3.30476700 |
| H | -0.19374300 | -3.32968100 | -1.91197500 |
| C | 3.55559800  | 1.94737100  | -0.28975800 |
| C | 2.94741400  | 2.62644000  | 0.80290500  |
| C | 2.82386100  | 4.02575400  | 0.73613400  |
| H | 2.35844000  | 4.56511100  | 1.57276200  |
| C | 3.27898500  | 4.73951400  | -0.37882800 |
| H | 3.18357800  | 5.83590800  | -0.40940400 |
| C | 3.83259200  | 4.05230800  | -1.46340100 |
| H | 4.15844100  | 4.61423900  | -2.35208200 |
| C | 3.97269900  | 2.65072400  | -1.45310300 |
| C | 2.48182400  | 1.86646700  | 2.03964700  |
| H | 2.22189000  | 0.83886400  | 1.70904400  |
| C | 3.61048900  | 1.74318600  | 3.07935600  |
| H | 3.25805500  | 1.19357600  | 3.97653300  |
| H | 3.95543900  | 2.74561900  | 3.40864600  |
| H | 4.48581600  | 1.19661400  | 2.67765700  |
| C | 1.21518000  | 2.46350900  | 2.65854600  |
| H | 0.41000000  | 2.56236100  | 1.90509700  |
| H | 1.39043800  | 3.46546400  | 3.10071200  |
| H | 0.84370100  | 1.80944200  | 3.47113100  |
| C | 4.53199400  | 1.95642300  | -2.69149900 |
| H | 4.64667200  | 0.87900900  | -2.45292800 |
| C | 5.90884100  | 2.50671300  | -3.10601900 |
| H | 6.64489400  | 2.48588900  | -2.27680800 |
| H | 5.83583500  | 3.55831300  | -3.45220200 |
| H | 6.32436400  | 1.91361000  | -3.94582800 |
| C | 3.54215700  | 2.06360200  | -3.86535400 |
| H | 3.94419900  | 1.54485900  | -4.75997100 |
| H | 3.36212500  | 3.12430000  | -4.13860900 |
| H | 2.57154400  | 1.59164600  | -3.60977500 |
| C | -0.17193400 | -0.22928700 | -1.74084200 |

Cartesian coordinates of the optimized geometry of Int-2 at PBE-D3BJ/def2-SVP level of theory:

|    |             |             |             |
|----|-------------|-------------|-------------|
| Ga | 2.09485000  | -0.21944400 | -0.34756800 |
| Ga | -2.09776900 | 0.19371300  | -0.34553900 |
| P  | 1.52516700  | -0.56161300 | -2.52448000 |
| P  | -1.53565800 | 0.43012100  | -2.54016800 |
| O  | -0.00226200 | -0.02059900 | -0.33762800 |
| N  | 3.18223500  | 1.43660500  | -0.02902700 |
| N  | 2.74445000  | -1.15229100 | 1.28657400  |
| N  | -3.20091000 | -1.45323900 | 0.01151700  |
| N  | -2.73039300 | 1.16253100  | 1.26965600  |
| C  | 3.87366900  | 1.68813000  | 1.09253400  |
| C  | 3.98526200  | 0.76350000  | 2.15475900  |
| H  | 4.58760500  | 1.09575300  | 3.00915700  |
| C  | 3.55211900  | -0.57625400 | 2.20521700  |
| C  | 4.61378100  | 2.99750500  | 1.22425700  |

|   |             |             |             |
|---|-------------|-------------|-------------|
| H | 5.30645900  | 3.15079700  | 0.37352600  |
| H | 5.18316300  | 3.04428800  | 2.16958300  |
| H | 3.89899700  | 3.84402500  | 1.19140900  |
| C | 4.06125200  | -1.40845100 | 3.36163300  |
| H | 4.44903100  | -2.38383300 | 3.00837500  |
| H | 3.25138100  | -1.63969300 | 4.08139100  |
| H | 4.86286800  | -0.87439600 | 3.90188500  |
| C | 3.43340700  | 2.24281700  | -1.19880600 |
| C | 4.45689000  | 1.81402200  | -2.08980200 |
| C | 4.72787600  | 2.60195600  | -3.22214500 |
| H | 5.51878800  | 2.28687700  | -3.91955200 |
| C | 4.00230100  | 3.77024900  | -3.48333300 |
| H | 4.22658900  | 4.37162800  | -4.37738000 |
| C | 2.98092900  | 4.15953000  | -2.61184500 |
| H | 2.39581700  | 5.06619900  | -2.82929000 |
| C | 2.67409900  | 3.40884500  | -1.46085100 |
| C | 5.26607100  | 0.54436600  | -1.84304700 |
| H | 4.75208800  | -0.02746900 | -1.04315100 |
| C | 6.67849700  | 0.86649800  | -1.32358700 |
| H | 7.24654400  | -0.06559600 | -1.12357900 |
| H | 6.64692800  | 1.45014600  | -0.38211000 |
| H | 7.24915800  | 1.45936000  | -2.06845600 |
| C | 5.31756000  | -0.35990700 | -3.08369700 |
| H | 5.87561200  | 0.11436200  | -3.91688400 |
| H | 4.29596100  | -0.59480200 | -3.44402800 |
| H | 5.83475500  | -1.31203000 | -2.84619200 |
| C | 1.52314500  | 3.84250100  | -0.56747900 |
| H | 1.50071300  | 3.15545100  | 0.30037600  |
| C | 1.70049900  | 5.27305300  | -0.03116700 |
| H | 2.66248600  | 5.40514300  | 0.50605100  |
| H | 0.87703200  | 5.52342200  | 0.66724700  |
| H | 1.67672000  | 6.01924300  | -0.85212600 |
| C | 0.18297000  | 3.69312400  | -1.30445900 |
| H | 0.03429500  | 2.66635400  | -1.69259800 |
| H | 0.12357300  | 4.38795900  | -2.16838100 |
| H | -0.65940300 | 3.92690100  | -0.62576200 |
| C | 2.44520000  | -2.55243800 | 1.42053300  |
| C | 3.11995600  | -3.48242400 | 0.58081700  |
| C | 2.87681000  | -4.85465600 | 0.77893000  |
| H | 3.39379500  | -5.58847700 | 0.14452300  |
| C | 1.98948000  | -5.30045600 | 1.76470500  |
| H | 1.81833300  | -6.37816600 | 1.90670500  |
| C | 1.30321300  | -4.37023000 | 2.55338400  |
| H | 0.58682700  | -4.72492600 | 3.30932000  |
| C | 1.50647600  | -2.98663200 | 2.39619700  |
| C | 4.11337400  | -3.02157400 | -0.48051500 |
| H | 3.78254400  | -2.01623200 | -0.81961500 |
| C | 5.52755200  | -2.86515700 | 0.10578700  |
| H | 5.89646400  | -3.83054500 | 0.51071300  |
| H | 5.55497700  | -2.11869200 | 0.92383700  |
| H | 6.23917100  | -2.52919500 | -0.67603700 |
| C | 4.11578600  | -3.90578100 | -1.73313400 |
| H | 3.09308400  | -4.01426000 | -2.14475100 |
| H | 4.52732400  | -4.91714700 | -1.53493900 |
| H | 4.74672500  | -3.44443100 | -2.51832100 |
| C | 0.69858400  | -2.00398200 | 3.23803500  |
| H | 1.19718600  | -1.01715300 | 3.17494700  |
| C | 0.62229200  | -2.39485300 | 4.72227500  |
| H | 0.01212300  | -3.30817900 | 4.87772400  |
| H | 0.14480600  | -1.58262900 | 5.30771300  |
| H | 1.62419000  | -2.58769400 | 5.15752500  |
| C | -0.70897900 | -1.82489900 | 2.64845000  |
| H | -0.65465500 | -1.40999600 | 1.62434900  |
| H | -1.31653000 | -1.13733800 | 3.27006400  |
| H | -1.24825100 | -2.79202200 | 2.59698700  |
| C | -3.92244500 | -1.65428300 | 1.12165500  |
| C | -4.00771600 | -0.71166600 | 2.17351600  |
| H | -4.62983900 | -1.01267400 | 3.02588900  |



|   |             |             |             |
|---|-------------|-------------|-------------|
| C | -3.55518500 | 0.62017000  | 2.19509000  |
| C | -4.78416100 | -2.88930600 | 1.24896400  |
| H | -5.79460800 | -2.68749600 | 0.83745600  |
| H | -4.90646100 | -3.16776400 | 2.31264600  |
| H | -4.37220900 | -3.74294600 | 0.68209400  |
| C | -4.07325600 | 1.49832700  | 3.31166900  |
| H | -4.54810400 | 2.41060700  | 2.89842300  |
| H | -3.25619400 | 1.85092600  | 3.97001900  |
| H | -4.81261100 | 0.95561300  | 3.92657700  |
| C | -3.45599500 | -2.26890300 | -1.14922700 |
| C | -4.60563500 | -1.99098600 | -1.93864000 |
| C | -4.83939000 | -2.78457900 | -3.07658600 |
| H | -5.72153300 | -2.57937400 | -3.70259800 |
| C | -3.96302800 | -3.81355000 | -3.43571300 |
| H | -4.16161500 | -4.42138600 | -4.33147400 |
| C | -2.82249100 | -4.05420200 | -2.66191500 |
| H | -2.12429600 | -4.85081400 | -2.95713400 |
| C | -2.54121100 | -3.28933200 | -1.51548900 |
| C | -5.54711700 | -0.82695600 | -1.64166000 |
| H | -5.23649200 | -0.36779800 | -0.68105200 |
| C | -7.01020400 | -1.27401300 | -1.48307900 |
| H | -7.41211700 | -1.68909200 | -2.43019500 |
| H | -7.65218800 | -0.41474900 | -1.19992500 |
| H | -7.12417400 | -2.05632700 | -0.70567300 |
| C | -5.42205200 | 0.25573300  | -2.72885900 |
| H | -4.37091800 | 0.58385500  | -2.85125600 |
| H | -6.04353600 | 1.13958700  | -2.47614300 |
| H | -5.76436700 | -0.12776200 | -3.71200700 |
| C | -1.31088900 | -3.59525900 | -0.67434800 |
| H | -1.08061900 | -2.68407000 | -0.08697800 |
| C | -1.60513200 | -4.73325200 | 0.32102400  |
| H | -1.89625800 | -5.65813600 | -0.21976600 |
| H | -2.42859600 | -4.47929900 | 1.01738600  |
| H | -0.70510400 | -4.95774300 | 0.92608500  |
| C | -0.06884900 | -3.91869800 | -1.51380700 |
| H | -0.17607800 | -4.87732000 | -2.06372100 |
| H | 0.81045300  | -4.02098400 | -0.84886200 |
| H | 0.15326000  | -3.10866300 | -2.23613900 |
| C | -2.42261100 | 2.56454000  | 1.36370900  |
| C | -3.11361900 | 3.48393200  | 0.52806900  |
| C | -2.83387800 | 4.85669500  | 0.67237400  |
| H | -3.36776100 | 5.58087100  | 0.03874600  |
| C | -1.88932000 | 5.31394100  | 1.59657700  |
| H | -1.68469800 | 6.39102700  | 1.69149700  |
| C | -1.19527500 | 4.39299800  | 2.39055500  |
| H | -0.44033000 | 4.75406800  | 3.10535000  |
| C | -1.44542800 | 3.01199400  | 2.29608700  |
| C | -4.15820200 | 3.04071000  | -0.49017800 |
| H | -4.12864200 | 1.93266400  | -0.54444500 |
| C | -5.57601400 | 3.42951500  | -0.03560400 |
| H | -6.33279700 | 3.06104300  | -0.75844500 |
| H | -5.68695900 | 4.53146200  | 0.03675800  |
| H | -5.81891900 | 3.00155600  | 0.95826600  |
| C | -3.84158100 | 3.56696200  | -1.89841600 |
| H | -2.85321500 | 3.19852700  | -2.24046000 |
| H | -3.83791200 | 4.67579900  | -1.93350500 |
| H | -4.60326000 | 3.21390100  | -2.62178500 |
| C | -0.65677300 | 2.04276800  | 3.17002600  |
| H | -1.15263100 | 1.05471100  | 3.10563100  |
| C | -0.62187700 | 2.45592700  | 4.65042000  |
| H | -1.63622000 | 2.63815300  | 5.06027700  |
| H | -0.03160900 | 3.38239000  | 4.80521500  |
| H | -0.14566700 | 1.66035100  | 5.25955100  |
| C | 0.76675300  | 1.85976300  | 2.62613000  |
| H | 1.34532100  | 1.15389500  | 3.25422400  |
| H | 1.31889800  | 2.82183400  | 2.61687200  |
| H | 0.74425400  | 1.46875300  | 1.59148600  |
| C | -0.00593100 | -0.05583000 | -1.76317900 |

Cartesian coordinates of the optimized geometry of TS-1 at PBE-D3BJ/def2-SVP level of theory:

|    |             |             |             |
|----|-------------|-------------|-------------|
| Ga | 1.86826100  | 0.36635600  | 0.53393700  |
| Ga | -1.77333100 | -0.29592200 | -0.75931500 |
| P  | -0.06393300 | -0.81073300 | 0.71292800  |
| P  | -0.62419500 | -0.06976400 | -2.81543600 |
| O  | 1.82153500  | 0.17436700  | -1.48404900 |
| C  | 0.60337200  | -0.15357400 | -1.63349400 |
| N  | 3.45866500  | -0.76729000 | 0.92084500  |
| N  | 2.75658500  | 2.08901800  | 0.84384300  |
| N  | -2.78902200 | -2.03992400 | -0.77034600 |
| N  | -3.41860600 | 0.84571000  | -0.70742400 |
| C  | 4.54530100  | -0.28591800 | 1.53985100  |
| C  | 4.70115900  | 1.07367800  | 1.90432500  |
| H  | 5.61493600  | 1.30791400  | 2.46528300  |
| C  | 3.91949000  | 2.17985300  | 1.52968600  |
| C  | 5.71523600  | -1.19008200 | 1.85807000  |
| H  | 6.01894400  | -1.05064900 | 2.91416000  |
| H  | 6.58617000  | -0.90479100 | 1.23406100  |
| H  | 5.49335300  | -2.25565700 | 1.67751200  |
| C  | 4.42433400  | 3.55233800  | 1.90766100  |
| H  | 5.38797300  | 3.48601600  | 2.44271600  |
| H  | 3.68924300  | 4.07550400  | 2.55155600  |
| H  | 4.55213500  | 4.19107000  | 1.01185900  |
| C  | 3.41744200  | -2.13367200 | 0.46375700  |
| C  | 2.80802400  | -3.12097700 | 1.28628900  |
| C  | 2.78739000  | -4.44832100 | 0.82034900  |
| H  | 2.31516300  | -5.22562600 | 1.43816600  |
| C  | 3.35221300  | -4.79460600 | -0.41229800 |
| H  | 3.32835800  | -5.84029500 | -0.75513900 |
| C  | 3.93041300  | -3.80646900 | -1.21491600 |
| H  | 4.35637700  | -4.08056500 | -2.19201000 |
| C  | 3.96679200  | -2.45955900 | -0.80655700 |
| C  | 2.24407100  | -2.78825700 | 2.66418900  |
| H  | 2.03376500  | -1.69823000 | 2.67777400  |
| C  | 3.27188500  | -3.08387200 | 3.77297800  |
| H  | 4.21073900  | -2.51358500 | 3.64128200  |
| H  | 3.53477300  | -4.16239000 | 3.78548800  |
| H  | 2.85492800  | -2.82550900 | 4.76817200  |
| C  | 0.91966400  | -3.50505700 | 2.95154400  |
| H  | 0.49719600  | -3.14755400 | 3.91286600  |
| H  | 1.04811900  | -4.60344500 | 3.04241000  |
| H  | 0.18086600  | -3.30365500 | 2.15273100  |
| C  | 4.61251200  | -1.42101000 | -1.72009300 |
| H  | 4.41795000  | -0.42198700 | -1.28175200 |
| C  | 6.13820700  | -1.61653600 | -1.79958200 |
| H  | 6.60278900  | -0.81925300 | -2.41570600 |
| H  | 6.38909400  | -2.59095900 | -2.26814600 |
| H  | 6.61505300  | -1.59933200 | -0.80057900 |
| C  | 4.00008100  | -1.42862500 | -3.13082900 |
| H  | 4.43063500  | -0.60582400 | -3.73806700 |
| H  | 2.90515100  | -1.28518200 | -3.09340300 |
| H  | 4.21418500  | -2.37878500 | -3.66258600 |
| C  | 2.15102400  | 3.29841600  | 0.35276400  |
| C  | 1.24081500  | 4.01271000  | 1.17598400  |
| C  | 0.71065500  | 5.22085500  | 0.68567800  |
| H  | -0.00515000 | 5.78338900  | 1.30327400  |
| C  | 1.09106900  | 5.72282200  | -0.56402400 |
| H  | 0.68056500  | 6.67974200  | -0.92119300 |
| C  | 1.97895100  | 4.99800200  | -1.36728800 |
| H  | 2.25688900  | 5.38716200  | -2.35870300 |
| C  | 2.51192800  | 3.76761100  | -0.94023000 |
| C  | 0.84019200  | 3.50218800  | 2.55449900  |
| H  | 1.55756500  | 2.70351100  | 2.83458800  |
| C  | 0.92165200  | 4.59305300  | 3.63484000  |

|   |             |             |             |
|---|-------------|-------------|-------------|
| H | 1.91608400  | 5.08467200  | 3.65648600  |
| H | 0.73317400  | 4.15647200  | 4.63658000  |
| H | 0.16092100  | 5.38485100  | 3.47655200  |
| C | -0.55932100 | 2.86934300  | 2.51400800  |
| H | -0.84579700 | 2.49189900  | 3.51673100  |
| H | -0.59865200 | 2.01551100  | 1.80774000  |
| H | -1.32234100 | 3.60567200  | 2.19336600  |
| C | 3.46582500  | 2.99748000  | -1.84876800 |
| H | 3.66608300  | 2.02040800  | -1.36728900 |
| C | 4.81356400  | 3.72524200  | -2.00056400 |
| H | 4.68362100  | 4.71922100  | -2.47732200 |
| H | 5.50444100  | 3.13533700  | -2.63744000 |
| H | 5.31123700  | 3.88503900  | -1.02294600 |
| C | 2.83658900  | 2.70397700  | -3.22045300 |
| H | 2.64040500  | 3.63625700  | -3.78997800 |
| H | 1.88502800  | 2.14925700  | -3.11510700 |
| H | 3.52266300  | 2.07938000  | -3.82854100 |
| C | -3.95232000 | -2.08269400 | -1.43669700 |
| C | -4.67650100 | -0.92463600 | -1.81576300 |
| H | -5.58990200 | -1.11069500 | -2.39408000 |
| C | -4.50759200 | 0.40367400  | -1.36764300 |
| C | -4.56538500 | -3.42266000 | -1.77302500 |
| H | -4.69031800 | -4.04144500 | -0.86262600 |
| H | -3.89582900 | -3.99694700 | -2.44297500 |
| H | -5.54743100 | -3.30057500 | -2.26334100 |
| C | -5.65395600 | 1.36075000  | -1.59827500 |
| H | -6.12182200 | 1.64084300  | -0.63269300 |
| H | -6.42673100 | 0.90561100  | -2.24278400 |
| H | -5.30424700 | 2.30648200  | -2.05491100 |
| C | -2.25736300 | -3.25708400 | -0.22031500 |
| C | -2.58263300 | -3.58500200 | 1.12716900  |
| C | -2.15757100 | -4.82719000 | 1.63175900  |
| H | -2.40586300 | -5.10261600 | 2.66635500  |
| C | -1.40194600 | -5.71020100 | 0.85033700  |
| H | -1.07873400 | -6.67683700 | 1.26622900  |
| C | -1.03203300 | -5.34116800 | -0.44551700 |
| H | -0.40027300 | -6.01493200 | -1.04450000 |
| C | -1.44276000 | -4.11551000 | -1.00514600 |
| C | -3.35166700 | -2.60809500 | 2.01341000  |
| H | -3.05831700 | -1.59072300 | 1.67696000  |
| C | -4.87763000 | -2.72708700 | 1.84493000  |
| H | -5.39918400 | -2.02497000 | 2.52838000  |
| H | -5.22305700 | -3.75389600 | 2.08739000  |
| H | -5.20484300 | -2.48724000 | 0.81551600  |
| C | -2.96547900 | -2.72747300 | 3.49359100  |
| H | -1.86995400 | -2.64425200 | 3.63097700  |
| H | -3.29954200 | -3.68900300 | 3.93518800  |
| H | -3.44695200 | -1.92161300 | 4.08102900  |
| C | -0.94800400 | -3.73330800 | -2.39330600 |
| H | -1.39085300 | -2.74959900 | -2.65244200 |
| C | -1.35344000 | -4.74336700 | -3.47920900 |
| H | -1.00774200 | -4.39695900 | -4.47455000 |
| H | -2.45204100 | -4.88523100 | -3.53546000 |
| H | -0.89996500 | -5.74045800 | -3.29933500 |
| C | 0.57811800  | -3.54770300 | -2.36885600 |
| H | 0.88573800  | -2.87197300 | -1.54697500 |
| H | 0.93480100  | -3.11155600 | -3.32403200 |
| H | 1.09772900  | -4.51568600 | -2.21672500 |
| C | -3.43068200 | 2.16402200  | -0.14046300 |
| C | -3.95426200 | 2.34727100  | 1.16865900  |
| C | -3.98702900 | 3.64860200  | 1.70291900  |
| H | -4.39287500 | 3.80356600  | 2.71463700  |
| C | -3.50326400 | 4.74369500  | 0.97724200  |
| H | -3.53195300 | 5.75353800  | 1.41453500  |
| C | -2.97873400 | 4.54620700  | -0.30479500 |
| H | -2.59392400 | 5.40616100  | -0.87411900 |
| C | -2.94216600 | 3.26716500  | -0.89285000 |
| C | -4.46551700 | 1.17875500  | 2.00238300  |

|   |             |            |             |
|---|-------------|------------|-------------|
| H | -4.43945400 | 0.27498100 | 1.36169000  |
| C | -5.92042900 | 1.38085900 | 2.45727300  |
| H | -6.29178200 | 0.47658800 | 2.98183600  |
| H | -6.59564400 | 1.57639800 | 1.59970900  |
| H | -6.01738100 | 2.23443700 | 3.15976200  |
| C | -3.53883700 | 0.91832100 | 3.20155500  |
| H | -2.52171600 | 0.63215700 | 2.86825400  |
| H | -3.93809300 | 0.09860100 | 3.83161900  |
| H | -3.44799700 | 1.82008200 | 3.84169600  |
| C | -2.40347900 | 3.10893900 | -2.30853000 |
| H | -2.47907000 | 2.03686600 | -2.57980900 |
| C | -3.22313800 | 3.91035400 | -3.33474300 |
| H | -3.15501800 | 5.00207400 | -3.14631700 |
| H | -4.29747000 | 3.63630600 | -3.31844200 |
| H | -2.84254100 | 3.72449000 | -4.35976900 |
| C | -0.92013300 | 3.49302000 | -2.38026700 |
| H | -0.77631500 | 4.57551300 | -2.19337000 |
| H | -0.50204800 | 3.25542200 | -3.37872100 |
| H | -0.32073700 | 2.94161500 | -1.63016700 |

Cartesian coordinates of the optimized geometry of TS-2 at PBE-D3BJ/def2-SVP level of theory:

|    |             |             |             |
|----|-------------|-------------|-------------|
| Ga | 2.66294600  | 0.12244500  | -0.14661700 |
| Ga | -2.55156500 | -0.06198200 | -0.14304900 |
| P  | 1.22269000  | -0.47485000 | -1.87788000 |
| P  | -1.29157600 | 1.41668800  | -1.15260900 |
| O  | 0.91328900  | 0.95132400  | 0.37964500  |
| N  | 3.83171100  | 1.72628700  | -0.32372200 |
| N  | 3.59655800  | -0.63464500 | 1.41733200  |
| N  | -3.14330100 | -1.93459900 | -0.26123100 |
| N  | -3.96877500 | 0.51661600  | 1.10991400  |
| C  | 4.82852100  | 2.02240600  | 0.51339000  |
| C  | 5.15273100  | 1.23110100  | 1.64554800  |
| H  | 5.97541000  | 1.61179000  | 2.26436100  |
| C  | 4.60781500  | 0.00163800  | 2.05309000  |
| C  | 5.67619400  | 3.25166500  | 0.28361700  |
| H  | 6.73940600  | 3.03095700  | 0.49755200  |
| H  | 5.36224300  | 4.05880600  | 0.97670600  |
| H  | 5.57684200  | 3.63632700  | -0.74737300 |
| C  | 5.22238100  | -0.66533800 | 3.26224000  |
| H  | 5.72455200  | -1.61254900 | 2.97835100  |
| H  | 4.44328800  | -0.94283600 | 3.99943200  |
| H  | 5.96242400  | -0.00405500 | 3.74667700  |
| C  | 3.50853300  | 2.53847500  | -1.46221000 |
| C  | 3.88596900  | 2.06094900  | -2.74881600 |
| C  | 3.50756400  | 2.81236100  | -3.87419500 |
| H  | 3.79139600  | 2.46179400  | -4.87710000 |
| C  | 2.76415300  | 3.99144300  | -3.73856200 |
| H  | 2.46806900  | 4.56196000  | -4.63193800 |
| C  | 2.38764700  | 4.43522700  | -2.46739500 |
| H  | 1.79018400  | 5.35440600  | -2.36840900 |
| C  | 2.74394400  | 3.72519400  | -1.30410000 |
| C  | 4.72457600  | 0.79663400  | -2.90250500 |
| H  | 4.53371000  | 0.16743100  | -2.00646900 |
| C  | 6.22702300  | 1.13206600  | -2.90317000 |
| H  | 6.83818500  | 0.20793200  | -2.96989700 |
| H  | 6.52737200  | 1.67309600  | -1.98398300 |
| H  | 6.48491400  | 1.77581000  | -3.76987400 |
| C  | 4.33372000  | -0.04766600 | -4.12131400 |
| H  | 4.59039400  | 0.45439000  | -5.07718000 |
| H  | 3.24576300  | -0.26034200 | -4.11642100 |
| H  | 4.87695300  | -1.01470600 | -4.10587900 |
| C  | 2.30252900  | 4.25531400  | 0.05698800  |
| H  | 2.65417000  | 3.54068200  | 0.82830700  |
| C  | 2.93094300  | 5.63175600  | 0.34941200  |
| H  | 4.03405400  | 5.62480200  | 0.24682000  |

|   |             |             |             |
|---|-------------|-------------|-------------|
| H | 2.68114000  | 5.96286800  | 1.37846400  |
| H | 2.54128500  | 6.40169200  | -0.34844300 |
| C | 0.77156400  | 4.33182400  | 0.17582700  |
| H | 0.29693400  | 3.34529000  | 0.01174000  |
| H | 0.34376700  | 5.04593200  | -0.55809200 |
| H | 0.48244500  | 4.68274800  | 1.18817800  |
| C | 3.25984000  | -1.97069500 | 1.81971300  |
| C | 4.03282800  | -3.05290400 | 1.30927600  |
| C | 3.72487300  | -4.35459500 | 1.74252800  |
| H | 4.30972400  | -5.20381200 | 1.35956600  |
| C | 2.68351800  | -4.58809900 | 2.65080000  |
| H | 2.46158400  | -5.61340200 | 2.98335800  |
| C | 1.91637900  | -3.51644800 | 3.11883200  |
| H | 1.09204200  | -3.70570300 | 3.82371200  |
| C | 2.17868200  | -2.19282300 | 2.71091500  |
| C | 5.13110900  | -2.81691000 | 0.27654500  |
| H | 5.45814500  | -1.76135800 | 0.37112100  |
| C | 6.37019800  | -3.69691400 | 0.49294000  |
| H | 6.15634300  | -4.76978600 | 0.30804200  |
| H | 6.76444200  | -3.60500800 | 1.52556700  |
| H | 7.17648200  | -3.40293200 | -0.20904800 |
| C | 4.56669800  | -2.98882100 | -1.14714400 |
| H | 3.70071000  | -2.31911400 | -1.32574500 |
| H | 4.21729000  | -4.02969900 | -1.30826700 |
| H | 5.34065700  | -2.76124300 | -1.90920500 |
| C | 1.31207600  | -1.05534400 | 3.23992700  |
| H | 1.67820600  | -0.11155300 | 2.78913500  |
| C | 1.42034500  | -0.92111200 | 4.76890000  |
| H | 1.02628300  | -1.81985800 | 5.28745800  |
| H | 0.83546600  | -0.04748600 | 5.12343300  |
| H | 2.47046700  | -0.78029400 | 5.09626900  |
| C | -0.15132500 | -1.22435300 | 2.80029300  |
| H | -0.23384200 | -1.16109500 | 1.69793500  |
| H | -0.77809300 | -0.41834300 | 3.22534000  |
| H | -0.57432200 | -2.19495900 | 3.12954200  |
| C | -4.09969300 | -2.45154900 | 0.54073800  |
| C | -4.74731900 | -1.73044000 | 1.56663300  |
| H | -5.44240300 | -2.31161300 | 2.18528900  |
| C | -4.74419600 | -0.33563300 | 1.79957300  |
| C | -4.57995000 | -3.86181700 | 0.28813500  |
| H | -5.29117500 | -3.86430500 | -0.56365500 |
| H | -5.10716500 | -4.25969200 | 1.17431800  |
| H | -3.75429900 | -4.54049900 | 0.00779600  |
| C | -5.68265100 | 0.20917700  | 2.84846500  |
| H | -6.30460500 | 1.02735700  | 2.43437000  |
| H | -5.11012300 | 0.65317500  | 3.68727900  |
| H | -6.33996800 | -0.58327500 | 3.24821300  |
| C | -2.75266800 | -2.67756700 | -1.43650900 |
| C | -3.58072500 | -2.60026500 | -2.58829800 |
| C | -3.23203600 | -3.37110400 | -3.71291700 |
| H | -3.86158200 | -3.32237300 | -4.61456600 |
| C | -2.09340700 | -4.18102600 | -3.70678100 |
| H | -1.83595800 | -4.78005800 | -4.59342700 |
| C | -1.26144200 | -4.20306500 | -2.58139300 |
| H | -0.34651700 | -4.80986100 | -2.60175300 |
| C | -1.56016900 | -3.45106300 | -1.42981800 |
| C | -4.77757900 | -1.65859000 | -2.67580700 |
| H | -4.95925600 | -1.23447300 | -1.66703000 |
| C | -6.07113800 | -2.36931800 | -3.10481500 |
| H | -5.99925300 | -2.76398600 | -4.13910600 |
| H | -6.92663300 | -1.66349700 | -3.08039800 |
| H | -6.31526600 | -3.22226700 | -2.43919800 |
| C | -4.44528900 | -0.48510100 | -3.61650700 |
| H | -3.54684200 | 0.06619500  | -3.26820500 |
| H | -5.29497400 | 0.22537800  | -3.67288600 |
| H | -4.24074600 | -0.84882200 | -4.64447700 |
| C | -0.61448500 | -3.45558000 | -0.23288400 |
| H | -0.54589000 | -2.39839100 | 0.10701500  |

|   |             |             |             |
|---|-------------|-------------|-------------|
| C | -1.13394500 | -4.29917600 | 0.94634600  |
| H | -1.34262000 | -5.34065200 | 0.62303600  |
| H | -2.05426700 | -3.88405800 | 1.39806200  |
| H | -0.36386900 | -4.34324000 | 1.74175800  |
| C | 0.81012700  | -3.88888100 | -0.59262200 |
| H | 0.86722800  | -4.97330000 | -0.82530900 |
| H | 1.48320000  | -3.70372900 | 0.26465700  |
| H | 1.19654800  | -3.31057700 | -1.45432300 |
| C | -4.10209600 | 1.93728000  | 1.28070100  |
| C | -4.82515500 | 2.66512400  | 0.29457200  |
| C | -4.98321100 | 4.05050900  | 0.47671800  |
| H | -5.54610100 | 4.63229000  | -0.26639100 |
| C | -4.41837400 | 4.70633900  | 1.57738400  |
| H | -4.55550500 | 5.79114100  | 1.70224700  |
| C | -3.64826000 | 3.98559800  | 2.49419800  |
| H | -3.16278000 | 4.51358600  | 3.32903000  |
| C | -3.46030800 | 2.59667400  | 2.36051600  |
| C | -5.38829200 | 1.96875500  | -0.94144100 |
| H | -4.66482200 | 1.16614900  | -1.21038000 |
| C | -6.73858600 | 1.28373000  | -0.66611600 |
| H | -7.11413800 | 0.77992200  | -1.58095600 |
| H | -7.49913000 | 2.02807300  | -0.35071000 |
| H | -6.66201400 | 0.51571900  | 0.12751000  |
| C | -5.47949900 | 2.89372600  | -2.16068700 |
| H | -4.51010100 | 3.39159300  | -2.35978100 |
| H | -6.25558900 | 3.67637900  | -2.03279200 |
| H | -5.75445200 | 2.31035100  | -3.06151700 |
| C | -2.52079400 | 1.87685400  | 3.32061100  |
| H | -2.61022300 | 0.78769300  | 3.12706600  |
| C | -2.87706300 | 2.11697700  | 4.79712500  |
| H | -3.93318400 | 1.86145500  | 5.02166500  |
| H | -2.72465100 | 3.17701400  | 5.08684900  |
| H | -2.22979200 | 1.50179600  | 5.45522400  |
| C | -1.06246100 | 2.28112200  | 3.02903800  |
| H | -0.37080200 | 1.79414100  | 3.74801700  |
| H | -0.93284800 | 3.37821500  | 3.13301100  |
| H | -0.75146000 | 1.99467100  | 2.00404300  |
| C | 0.33436100  | 0.57222600  | -0.75879000 |

Cartesian coordinates of the optimized geometry of TS-2 at PBE-D3BJ/def2-SVP level of theory:

|    |             |             |             |
|----|-------------|-------------|-------------|
| Ga | -1.89289100 | 0.02918800  | -0.23846200 |
| Ga | 1.89288100  | -0.02919100 | -0.23853900 |
| P  | -1.49707300 | 0.71292200  | -2.40564900 |
| P  | 1.49697200  | -0.71289300 | -2.40572000 |
| O  | 0.00000000  | -0.00000100 | 0.01479700  |
| N  | -2.83413700 | -1.74275800 | -0.15211600 |
| N  | -2.80112300 | 0.80618300  | 1.34184400  |
| N  | 2.83413300  | 1.74275300  | -0.15222200 |
| N  | 2.80116900  | -0.80619100 | 1.34173300  |
| C  | -3.62306900 | -2.10421800 | 0.86795300  |
| C  | -3.86817200 | -1.28639100 | 1.99696500  |
| H  | -4.49096300 | -1.74079200 | 2.77816400  |
| C  | -3.56971400 | 0.07615700  | 2.17982700  |
| C  | -4.37570400 | -3.41645300 | 0.82945800  |
| H  | -5.44809700 | -3.22551500 | 0.62084000  |
| H  | -4.32207100 | -3.91000000 | 1.81936700  |
| H  | -3.99547500 | -4.10235300 | 0.05331000  |
| C  | -4.17953200 | 0.75291200  | 3.38670400  |
| H  | -4.66279600 | 1.70985800  | 3.10920100  |
| H  | -3.40034700 | 1.00390800  | 4.13333000  |
| H  | -4.92526200 | 0.09697700  | 3.86960600  |
| C  | -2.88388300 | -2.47590300 | -1.39120900 |
| C  | -3.96150200 | -2.23480900 | -2.28689300 |
| C  | -3.98798300 | -2.94557400 | -3.50152600 |
| H  | -4.81444000 | -2.77168400 | -4.20783800 |

|   |             |             |             |
|---|-------------|-------------|-------------|
| C | -2.97714900 | -3.85217100 | -3.83155300 |
| H | -3.01143400 | -4.39414800 | -4.78887300 |
| C | -1.91011500 | -4.05625000 | -2.94848300 |
| H | -1.10931900 | -4.75589300 | -3.22406100 |
| C | -1.83485400 | -3.37715400 | -1.71876000 |
| C | -5.06900500 | -1.22362000 | -1.99973300 |
| H | -4.85241500 | -0.74557900 | -1.02273400 |
| C | -6.45022800 | -1.89468900 | -1.89190100 |
| H | -7.22429000 | -1.15248200 | -1.60693900 |
| H | -6.46137000 | -2.70810200 | -1.14015900 |
| H | -6.75521700 | -2.33851700 | -2.86212400 |
| C | -5.09823400 | -0.10972100 | -3.06079500 |
| H | -5.36512500 | -0.51294400 | -4.05929000 |
| H | -4.11005000 | 0.38278600  | -3.15352000 |
| H | -5.85585200 | 0.65744300  | -2.79931800 |
| C | -0.67938900 | -3.63315700 | -0.75698000 |
| H | -0.42890400 | -2.65687800 | -0.28780200 |
| C | -1.08133000 | -4.61392500 | 0.36089300  |
| H | -1.89910600 | -4.22469700 | 0.99373400  |
| H | -0.21359400 | -4.81180500 | 1.02084800  |
| H | -1.41344100 | -5.58122200 | -0.07114100 |
| C | 0.58980000  | -4.14171100 | -1.44863100 |
| H | 0.89541100  | -3.46860900 | -2.27405100 |
| H | 0.46212400  | -5.17134100 | -1.84467500 |
| H | 1.41834000  | -4.17482600 | -0.71596600 |
| C | -2.70212200 | 2.22463200  | 1.54552300  |
| C | -3.51246500 | 3.08114600  | 0.74710600  |
| C | -3.46076500 | 4.46535700  | 0.99531600  |
| H | -4.08356000 | 5.14361000  | 0.39493600  |
| C | -2.62432700 | 4.99488600  | 1.98582100  |
| H | -2.60045900 | 6.08048800  | 2.16458600  |
| C | -1.80402900 | 4.14181200  | 2.73168900  |
| H | -1.13055000 | 4.56488200  | 3.49261500  |
| C | -1.81950500 | 2.74857500  | 2.52809900  |
| C | -4.43214700 | 2.51713800  | -0.33242000 |
| H | -3.94544200 | 1.59686800  | -0.72032100 |
| C | -5.79669900 | 2.09803500  | 0.24442700  |
| H | -6.31676700 | 2.96630500  | 0.70021900  |
| H | -5.69629800 | 1.31343300  | 1.01917400  |
| H | -6.44858000 | 1.69242300  | -0.55659900 |
| C | -4.60427800 | 3.45699900  | -1.53211700 |
| H | -3.62372400 | 3.77416300  | -1.93795000 |
| H | -5.18638400 | 4.36566800  | -1.27308800 |
| H | -5.15393100 | 2.93836100  | -2.34213900 |
| C | -0.88336200 | 1.85849100  | 3.33865100  |
| H | -1.17744700 | 0.80765300  | 3.14919600  |
| C | -0.97343600 | 2.11449000  | 4.85243300  |
| H | -0.57438500 | 3.11376500  | 5.12292600  |
| H | -0.37269000 | 1.36286500  | 5.40495900  |
| H | -2.01520300 | 2.06312900  | 5.22913800  |
| C | 0.56650600  | 2.01024800  | 2.85369900  |
| H | 0.65690000  | 1.71615800  | 1.79148900  |
| H | 1.24933600  | 1.36988700  | 3.44711700  |
| H | 0.91887000  | 3.05624200  | 2.95676000  |
| C | 3.62310000  | 2.10421100  | 0.86782000  |
| C | 3.86823700  | 1.28638300  | 1.99682400  |
| H | 4.49105300  | 1.74078200  | 2.77800300  |
| C | 3.56978400  | -0.07616500 | 2.17969400  |
| C | 4.37573900  | 3.41644400  | 0.82930200  |
| H | 5.44812600  | 3.22550100  | 0.62065800  |
| H | 4.32213200  | 3.90999400  | 1.81921000  |
| H | 3.99549300  | 4.10234300  | 0.05316100  |
| C | 4.17964200  | -0.75291900 | 3.38655100  |
| H | 4.66290100  | -1.70986300 | 3.10903000  |
| H | 3.40048200  | -1.00392000 | 4.13320100  |
| H | 4.92538500  | -0.09698400 | 3.86943000  |
| C | 2.88383600  | 2.47590100  | -1.39131500 |
| C | 3.96141500  | 2.23479800  | -2.28704400 |

|   |             |             |             |
|---|-------------|-------------|-------------|
| C | 3.98785600  | 2.94556700  | -3.50167500 |
| H | 4.81428300  | 2.77167100  | -4.20802100 |
| C | 2.97701900  | 3.85217800  | -3.83165700 |
| H | 3.01127200  | 4.39415900  | -4.78897500 |
| C | 1.91002300  | 4.05626400  | -2.94854400 |
| H | 1.10922200  | 4.75591700  | -3.22408700 |
| C | 1.83480300  | 3.37716400  | -1.71882000 |
| C | 5.06891900  | 1.22359600  | -1.99993100 |
| H | 4.85235300  | 0.74554400  | -1.02293200 |
| C | 6.45014900  | 1.89465200  | -1.89213000 |
| H | 6.75511200  | 2.33849400  | -2.86235500 |
| H | 7.22421500  | 1.15243600  | -1.60720200 |
| H | 6.46131900  | 2.70805300  | -1.14037600 |
| C | 5.09810900  | 0.10971100  | -3.06100900 |
| H | 4.10992000  | -0.38278800 | -3.15371400 |
| H | 5.85572800  | -0.65746300 | -2.79956200 |
| H | 5.36497800  | 0.51294400  | -4.05950500 |
| C | 0.67937500  | 3.63317000  | -0.75699700 |
| H | 0.42889400  | 2.65688900  | -0.28782100 |
| C | 1.08136400  | 4.61392200  | 0.36087300  |
| H | 1.41347500  | 5.58121900  | -0.07116100 |
| H | 1.89915300  | 4.22467600  | 0.99368600  |
| H | 0.21365000  | 4.81180800  | 1.02085700  |
| C | -0.58983300 | 4.14174700  | -1.44859800 |
| H | -0.46215900 | 5.17138000  | -1.84463200 |
| H | -1.41834800 | 4.17486100  | -0.71590400 |
| H | -0.89548000 | 3.46866000  | -2.27401700 |
| C | 2.70217700  | -2.22464000 | 1.54541900  |
| C | 3.51249200  | -3.08115500 | 0.74697500  |
| C | 3.46080500  | -4.46536500 | 0.99519200  |
| H | 4.08357800  | -5.14362000 | 0.39479100  |
| C | 2.62440600  | -4.99489200 | 1.98573100  |
| H | 2.60054900  | -6.08049300 | 2.16450200  |
| C | 1.80413300  | -4.14181800 | 2.73162600  |
| H | 1.13068300  | -4.56488700 | 3.49257700  |
| C | 1.81959600  | -2.74858100 | 2.52802800  |
| C | 4.43212100  | -2.51714300 | -0.33259500 |
| H | 3.94534400  | -1.59692800 | -0.72053600 |
| C | 5.79665600  | -2.09791800 | 0.24420400  |
| H | 6.44850000  | -1.69232000 | -0.55686000 |
| H | 6.31678500  | -2.96612700 | 0.70004400  |
| H | 5.69622300  | -1.31327000 | 1.01889800  |
| C | 4.60430100  | -3.45705200 | -1.53224700 |
| H | 3.62376500  | -3.77432500 | -1.93803900 |
| H | 5.18649400  | -4.36565700 | -1.27318600 |
| H | 5.15388800  | -2.93840800 | -2.34231000 |
| C | 0.88347800  | -1.85849700 | 3.33860800  |
| H | 1.17755200  | -0.80766000 | 3.14913800  |
| C | 0.97360200  | -2.11449000 | 4.85238800  |
| H | 2.01538100  | -2.06312500 | 5.22905900  |
| H | 0.57456100  | -3.11376400 | 5.12289900  |
| H | 0.37287300  | -1.36286300 | 5.40493100  |
| C | -0.56640600 | -2.01026100 | 2.85370500  |
| H | -1.24921800 | -1.36989800 | 3.44714100  |
| H | -0.91876400 | -3.05625500 | 2.95678500  |
| H | -0.65683500 | -1.71618000 | 1.79149600  |
| C | -0.00004000 | 0.00001100  | -1.91338700 |

Cartesian coordinates of the optimized geometry of **1** at PBE0-D3BJ/def2-SVP level of theory:

|    |             |             |             |
|----|-------------|-------------|-------------|
| Ga | -1.66109000 | -0.08304500 | 0.63838200  |
| Ga | 1.64991200  | 0.09709200  | -0.45904800 |
| P  | 0.42013800  | 0.05036500  | 1.41163400  |
| P  | 0.76631800  | 0.13427300  | -2.90049100 |
| O  | -1.63138100 | -0.13907400 | -1.45648100 |
| C  | -0.61334300 | -0.02173700 | -2.09488700 |



|   |             |             |             |
|---|-------------|-------------|-------------|
| N | -3.07971700 | 1.28608500  | 0.87459700  |
| N | -2.90685900 | -1.59180500 | 0.95118700  |
| N | 2.90701600  | 1.61834100  | -0.74654400 |
| N | 3.03955000  | -1.28208700 | -0.84502500 |
| C | -4.17808500 | 1.05078900  | 1.59536500  |
| C | -4.56032600 | -0.21857300 | 2.04766800  |
| H | -5.45553600 | -0.25537100 | 2.66508400  |
| C | -4.01865400 | -1.45489200 | 1.67698000  |
| C | -5.08930300 | 2.19205000  | 1.95049200  |
| H | -5.98575900 | 1.82857300  | 2.46563000  |
| H | -5.38901400 | 2.75787700  | 1.05828100  |
| H | -4.56851100 | 2.90642200  | 2.60229400  |
| C | -4.76432900 | -2.67997500 | 2.12634300  |
| H | -5.69309800 | -2.40508800 | 2.63915300  |
| H | -4.13992800 | -3.26951600 | 2.81158000  |
| H | -4.99911100 | -3.34247500 | 1.28281400  |
| C | -2.91965000 | 2.60837600  | 0.34859700  |
| C | -2.30451500 | 3.61393600  | 1.12247500  |
| C | -2.28359200 | 4.91657000  | 0.61262500  |
| H | -1.81153400 | 5.70802100  | 1.19961600  |
| C | -2.85801600 | 5.22334800  | -0.61407600 |
| H | -2.84479000 | 6.25129700  | -0.98454900 |
| C | -3.43096000 | 4.21352300  | -1.37893700 |
| H | -3.86264600 | 4.45404200  | -2.35333400 |
| C | -3.46313300 | 2.89310400  | -0.92418800 |
| C | -1.68343500 | 3.34442600  | 2.48037400  |
| H | -1.83182800 | 2.27876100  | 2.71278300  |
| C | -2.32752800 | 4.17420000  | 3.59337700  |
| H | -3.41631300 | 4.03154400  | 3.66121400  |
| H | -2.14699200 | 5.25055700  | 3.44441400  |
| H | -1.89399700 | 3.90122600  | 4.56779700  |
| C | -0.18037500 | 3.59944300  | 2.44368500  |
| H | 0.26906200  | 3.37415000  | 3.42332700  |
| H | 0.04119900  | 4.65057000  | 2.20613700  |
| H | 0.31123700  | 2.95773400  | 1.69995500  |
| C | -4.10948800 | 1.81919900  | -1.78152200 |
| H | -3.84376400 | 0.84958500  | -1.34123900 |
| C | -5.63554700 | 1.92027800  | -1.77490800 |
| H | -6.07553300 | 1.13212800  | -2.40653300 |
| H | -5.97311100 | 2.89322600  | -2.16712600 |
| H | -6.05073900 | 1.80230500  | -0.76372700 |
| C | -3.57256200 | 1.83011100  | -3.21108700 |
| H | -3.96157800 | 0.96593200  | -3.77103100 |
| H | -2.47520000 | 1.77824800  | -3.22847100 |
| H | -3.87715400 | 2.73740500  | -3.75650200 |
| C | -2.61264400 | -2.89992200 | 0.45074100  |
| C | -1.83070300 | -3.79919700 | 1.20325100  |
| C | -1.67051300 | -5.09997900 | 0.71224600  |
| H | -1.06701200 | -5.81066700 | 1.28191600  |
| C | -2.27226200 | -5.50650100 | -0.47162700 |
| H | -2.14828600 | -6.53290200 | -0.82561800 |
| C | -3.01701000 | -4.59729600 | -1.21555700 |
| H | -3.47102600 | -4.91479200 | -2.15734800 |
| C | -3.18940500 | -3.28095200 | -0.78243000 |
| C | -1.18163300 | -3.42151800 | 2.52163900  |
| H | -1.42118600 | -2.36627700 | 2.72304700  |
| C | -1.69981100 | -4.26652300 | 3.68767800  |
| H | -2.79242600 | -4.21427100 | 3.80401100  |
| H | -1.24714100 | -3.92672800 | 4.63196600  |
| H | -1.43480200 | -5.32805100 | 3.55898100  |
| C | 0.33627200  | -3.53415500 | 2.43272700  |
| H | 0.80046000  | -3.20022300 | 3.37327800  |
| H | 0.73216000  | -2.89988400 | 1.62856600  |
| H | 0.65097500  | -4.57268900 | 2.25168400  |
| C | -4.01304100 | -2.31424500 | -1.61653500 |
| H | -3.85537500 | -1.31084000 | -1.19906700 |
| C | -5.51060000 | -2.61432100 | -1.53271500 |
| H | -5.73537700 | -3.62791100 | -1.90226900 |

|   |             |             |             |
|---|-------------|-------------|-------------|
| H | -6.08023900 | -1.89877800 | -2.14671200 |
| H | -5.88915300 | -2.53968400 | -0.50348300 |
| C | -3.55307100 | -2.27610400 | -3.07192300 |
| H | -3.73552300 | -3.23327000 | -3.58550700 |
| H | -2.48128100 | -2.04921200 | -3.14515300 |
| H | -4.10348600 | -1.49876800 | -3.62406600 |
| C | 3.94184700  | 1.50069700  | -1.57550000 |
| C | 4.37960200  | 0.27671500  | -2.10825100 |
| H | 5.20953100  | 0.33863300  | -2.80974700 |
| C | 4.05018300  | -1.01493500 | -1.67004300 |
| C | 4.73682800  | 2.72069200  | -1.95034900 |
| H | 5.04932500  | 3.27306000  | -1.05255500 |
| H | 4.12592200  | 3.41524400  | -2.54378200 |
| H | 5.62427800  | 2.44472700  | -2.53143600 |
| C | 4.94045600  | -2.13460800 | -2.13087800 |
| H | 5.41638700  | -2.62604300 | -1.26970500 |
| H | 5.72051800  | -1.76313700 | -2.80528000 |
| H | 4.35844300  | -2.91209600 | -2.64445400 |
| C | 2.66654700  | 2.89613900  | -0.15016300 |
| C | 3.13034900  | 3.12684800  | 1.16257300  |
| C | 3.01796400  | 4.41605300  | 1.68834200  |
| H | 3.38526700  | 4.61733400  | 2.69582100  |
| C | 2.43219900  | 5.44410500  | 0.95849900  |
| H | 2.35522000  | 6.44594400  | 1.38795000  |
| C | 1.91645400  | 5.18336300  | -0.30370700 |
| H | 1.42019700  | 5.98180900  | -0.86005400 |
| C | 2.02198800  | 3.91430400  | -0.88105800 |
| C | 3.75341000  | 2.01266400  | 1.98056800  |
| H | 3.27450700  | 1.07723500  | 1.65073700  |
| C | 5.25440700  | 1.88783400  | 1.71671000  |
| H | 5.69161900  | 1.08926300  | 2.33610900  |
| H | 5.77478500  | 2.82781900  | 1.96181500  |
| H | 5.46830000  | 1.64387000  | 0.66608900  |
| C | 3.46544700  | 2.14706300  | 3.47143700  |
| H | 2.38499700  | 2.23477800  | 3.65462600  |
| H | 3.97035500  | 3.01856200  | 3.91721100  |
| H | 3.82592100  | 1.25761100  | 4.00722000  |
| C | 1.39972700  | 3.65974200  | -2.23786000 |
| H | 1.76645600  | 2.68803000  | -2.60154900 |
| C | 1.75802700  | 4.71474400  | -3.28248200 |
| H | 1.36149800  | 4.42197000  | -4.26684400 |
| H | 2.84586700  | 4.85149100  | -3.38352700 |
| H | 1.32398500  | 5.69659800  | -3.03677700 |
| C | -0.11404800 | 3.54311400  | -2.08868800 |
| H | -0.38694600 | 2.79011100  | -1.33531500 |
| H | -0.58205800 | 3.25776700  | -3.04302100 |
| H | -0.54921400 | 4.49907100  | -1.76459200 |
| C | 2.94810000  | -2.60287800 | -0.30238100 |
| C | 3.57124200  | -2.87234000 | 0.93336000  |
| C | 3.54465500  | -4.18029500 | 1.42449500  |
| H | 4.03036900  | -4.40133500 | 2.37821000  |
| C | 2.90925500  | -5.19923300 | 0.72652100  |
| H | 2.89688900  | -6.21563400 | 1.12754700  |
| C | 2.27861300  | -4.91501200 | -0.47815700 |
| H | 1.76613900  | -5.71274000 | -1.02085800 |
| C | 2.29249700  | -3.62586400 | -1.01795100 |
| C | 4.28299300  | -1.79691000 | 1.72880800  |
| H | 4.17232300  | -0.85243200 | 1.17683800  |
| C | 5.77973500  | -2.08548400 | 1.84651100  |
| H | 6.29128200  | -1.27134400 | 2.38320400  |
| H | 6.25352700  | -2.18457100 | 0.85801600  |
| H | 5.96779000  | -3.01846100 | 2.40128000  |
| C | 3.63773000  | -1.60842900 | 3.10019800  |
| H | 2.58634300  | -1.29882000 | 2.99879100  |
| H | 4.17247500  | -0.83652100 | 3.67397700  |
| H | 3.66849400  | -2.53802000 | 3.69047700  |
| C | 1.59654400  | -3.36397700 | -2.33598000 |
| H | 1.87105000  | -2.35017000 | -2.66359800 |

|   |             |             |             |
|---|-------------|-------------|-------------|
| C | 2.01278200  | -4.33723300 | -3.43744300 |
| H | 1.68473400  | -5.36570500 | -3.21930400 |
| H | 3.10422000  | -4.36232900 | -3.58022600 |
| H | 1.55402200  | -4.04438100 | -4.39448300 |
| C | 0.08509400  | -3.38178900 | -2.14216000 |
| H | -0.26357200 | -4.38416000 | -1.85584800 |
| H | -0.43098100 | -3.09033400 | -3.06927100 |
| H | -0.22631900 | -2.69241800 | -1.34465600 |

Cartesian coordinates of the optimized geometry of **2** at PBE0-D3BJ/def2-SVP level of theory:

|    |             |             |             |
|----|-------------|-------------|-------------|
| Ga | -1.55872500 | -0.30985900 | -0.02615400 |
| Ga | 1.55779500  | 0.31090500  | -0.05677800 |
| P  | -1.50640500 | 0.78642700  | -2.13310100 |
| P  | 1.42558900  | -0.73330600 | -2.18763500 |
| O  | 0.00663600  | 0.00520100  | 0.82702400  |
| N  | -2.23868500 | -2.16434000 | -0.20939100 |
| N  | -2.89242800 | 0.26185900  | 1.30290200  |
| N  | 2.23602100  | 2.16249500  | -0.26784000 |
| N  | 2.91706100  | -0.24454300 | 1.26184900  |
| C  | -3.04659000 | -2.69924000 | 0.70203000  |
| C  | -3.54473300 | -2.00632000 | 1.81747100  |
| H  | -4.13059200 | -2.60349200 | 2.51517700  |
| C  | -3.54939800 | -0.62505800 | 2.04946400  |
| C  | -3.53242800 | -4.11933000 | 0.56661600  |
| H  | -4.62478300 | -4.12581400 | 0.44365700  |
| H  | -3.31380400 | -4.66582000 | 1.49559200  |
| H  | -3.07952200 | -4.64922600 | -0.27763400 |
| C  | -4.37377400 | -0.13937700 | 3.20918700  |
| H  | -5.01206700 | 0.70736500  | 2.92222500  |
| H  | -3.71530000 | 0.22459600  | 4.01026800  |
| H  | -4.99862100 | -0.94583600 | 3.60986800  |
| C  | -2.03662400 | -2.84425400 | -1.45417400 |
| C  | -3.01185800 | -2.71101600 | -2.46619900 |
| C  | -2.81307000 | -3.39047200 | -3.67156700 |
| H  | -3.55895700 | -3.30068300 | -4.46485500 |
| C  | -1.68525900 | -4.17232000 | -3.87704100 |
| H  | -1.54528000 | -4.69594600 | -4.82571600 |
| C  | -0.72655400 | -4.27804600 | -2.87609100 |
| H  | 0.16333600  | -4.88269800 | -3.05310900 |
| C  | -0.87314500 | -3.61826200 | -1.65283900 |
| C  | -4.27542600 | -1.88643600 | -2.28867200 |
| H  | -4.17425800 | -1.31763300 | -1.35177600 |
| C  | -5.51442000 | -2.77632400 | -2.16419300 |
| H  | -6.41043800 | -2.16717300 | -1.96555200 |
| H  | -5.41793800 | -3.51216400 | -1.35521200 |
| H  | -5.68958300 | -3.33498700 | -3.09751400 |
| C  | -4.47339500 | -0.87964300 | -3.42047200 |
| H  | -4.64880400 | -1.38286800 | -4.38410300 |
| H  | -3.59642600 | -0.22596500 | -3.53203000 |
| H  | -5.35237800 | -0.24777200 | -3.21856200 |
| C  | 0.18331100  | -3.76858800 | -0.57197400 |
| H  | 0.27683400  | -2.78724800 | -0.07477000 |
| C  | -0.21165700 | -4.79509300 | 0.49244800  |
| H  | -1.08702800 | -4.48654300 | 1.07426400  |
| H  | 0.61886800  | -4.93267200 | 1.20061000  |
| H  | -0.43164300 | -5.76996700 | 0.02822800  |
| C  | 1.55451300  | -4.13816100 | -1.12470400 |
| H  | 1.83993600  | -3.48764000 | -1.96315300 |
| H  | 1.58374500  | -5.18431900 | -1.47037900 |
| H  | 2.31136700  | -4.03463100 | -0.33612600 |
| C  | -3.09785500 | 1.65211500  | 1.54889800  |
| C  | -4.06933400 | 2.32543200  | 0.77395900  |
| C  | -4.35944800 | 3.65581800  | 1.08545100  |
| H  | -5.11714700 | 4.18982400  | 0.50932800  |
| C  | -3.68194800 | 4.31862300  | 2.10434500  |

|   |             |             |             |
|---|-------------|-------------|-------------|
| H | -3.92020700 | 5.36020400  | 2.33237200  |
| C | -2.68433000 | 3.66010500  | 2.81183800  |
| H | -2.13662700 | 4.19382100  | 3.59268200  |
| C | -2.36965100 | 2.32056500  | 2.55555800  |
| C | -4.78353600 | 1.61998700  | -0.36629400 |
| H | -4.08530000 | 0.86028200  | -0.75175900 |
| C | -6.03668100 | 0.87789300  | 0.10111800  |
| H | -6.75254700 | 1.57110900  | 0.57158900  |
| H | -5.80139400 | 0.08536300  | 0.82482700  |
| H | -6.54061700 | 0.40140500  | -0.75473700 |
| C | -5.11008500 | 2.55319100  | -1.52786300 |
| H | -4.22190900 | 3.11254600  | -1.85479800 |
| H | -5.89803200 | 3.27805600  | -1.26879000 |
| H | -5.47626700 | 1.97078100  | -2.38607700 |
| C | -1.27455000 | 1.64669200  | 3.36355300  |
| H | -1.22209100 | 0.59805000  | 3.03829400  |
| C | -1.54697200 | 1.69155100  | 4.86820000  |
| H | -1.51055800 | 2.72294500  | 5.25341900  |
| H | -0.78183000 | 1.11412200  | 5.41013600  |
| H | -2.53086400 | 1.27950000  | 5.13693300  |
| C | 0.09024100  | 2.26381200  | 3.06498500  |
| H | 0.32577000  | 2.17821000  | 1.99836500  |
| H | 0.87976200  | 1.73586500  | 3.62156500  |
| H | 0.12653900  | 3.32548900  | 3.35684000  |
| C | 3.04680300  | 2.71536000  | 0.63097900  |
| C | 3.56658300  | 2.03409600  | 1.74341100  |
| H | 4.16290400  | 2.63891700  | 2.42570000  |
| C | 3.59543700  | 0.65309000  | 1.97579300  |
| C | 3.51567000  | 4.14102500  | 0.47902600  |
| H | 4.59641000  | 4.16053300  | 0.27788800  |
| H | 3.35803400  | 4.67578700  | 1.42656500  |
| H | 3.00586500  | 4.67762000  | -0.32729100 |
| C | 4.52228200  | 0.17997700  | 3.06108900  |
| H | 5.44403800  | -0.21820500 | 2.61055600  |
| H | 4.08670800  | -0.63646900 | 3.64889800  |
| H | 4.79563200  | 1.00801700  | 3.72584200  |
| C | 2.01484100  | 2.84883800  | -1.50520800 |
| C | 2.94830500  | 2.67286200  | -2.54923300 |
| C | 2.77871100  | 3.41943700  | -3.71874000 |
| H | 3.49491900  | 3.30635100  | -4.53508900 |
| C | 1.71034800  | 4.29388900  | -3.86311100 |
| H | 1.59559200  | 4.87274200  | -4.78265800 |
| C | 0.76960400  | 4.40944700  | -2.84666900 |
| H | -0.08549400 | 5.07166400  | -2.98547200 |
| C | 0.89068400  | 3.68741500  | -1.65574100 |
| C | 4.11301400  | 1.70215300  | -2.44495900 |
| H | 3.86996500  | 0.99409300  | -1.63739400 |
| C | 5.42520700  | 2.39287300  | -2.07184900 |
| H | 5.69701100  | 3.15346700  | -2.82137000 |
| H | 6.24523900  | 1.65859300  | -2.02365400 |
| H | 5.36760000  | 2.88949200  | -1.09489300 |
| C | 4.29228400  | 0.88610400  | -3.72333100 |
| H | 3.35020100  | 0.40295100  | -4.02083900 |
| H | 5.04546800  | 0.09908600  | -3.56856700 |
| H | 4.64248500  | 1.50848900  | -4.56152500 |
| C | -0.16260600 | 3.82225800  | -0.56918700 |
| H | -0.27535900 | 2.82401500  | -0.11162100 |
| C | 0.23417600  | 4.79868800  | 0.54024700  |
| H | 0.48529700  | 5.78624700  | 0.12057900  |
| H | 1.08839600  | 4.44614300  | 1.12861000  |
| H | -0.60850100 | 4.92729500  | 1.23603700  |
| C | -1.52347700 | 4.22992000  | -1.12101300 |
| H | -1.53254100 | 5.28352200  | -1.44417500 |
| H | -2.28441900 | 4.12376700  | -0.33743400 |
| H | -1.81609900 | 3.59986500  | -1.97321200 |
| C | 3.12466500  | -1.63108600 | 1.53402300  |
| C | 4.17240900  | -2.31012300 | 0.87559300  |
| C | 4.40334800  | -3.65089600 | 1.19701000  |

|   |             |             |             |
|---|-------------|-------------|-------------|
| H | 5.21277600  | -4.18880100 | 0.69707400  |
| C | 3.62023500  | -4.31012100 | 2.13690300  |
| H | 3.81637600  | -5.35768700 | 2.37729500  |
| C | 2.58153400  | -3.63166700 | 2.76444600  |
| H | 1.96781800  | -4.15261100 | 3.50365700  |
| C | 2.30913800  | -2.28916400 | 2.48245800  |
| C | 5.05155400  | -1.63182300 | -0.15945900 |
| H | 4.73113500  | -0.58149800 | -0.22855800 |
| C | 6.52649700  | -1.63981400 | 0.24434400  |
| H | 7.12624900  | -1.06772100 | -0.48069200 |
| H | 6.93069200  | -2.66405200 | 0.27255500  |
| H | 6.68545100  | -1.19548200 | 1.23802400  |
| C | 4.87069200  | -2.26153400 | -1.54028900 |
| H | 3.83086100  | -2.18315000 | -1.88594000 |
| H | 5.14280800  | -3.32886000 | -1.53169600 |
| H | 5.51246700  | -1.75961800 | -2.28039600 |
| C | 1.19801400  | -1.57890000 | 3.23579500  |
| H | 1.07117000  | -0.58869600 | 2.77919200  |
| C | 1.53723500  | -1.40479300 | 4.71724200  |
| H | 2.46085400  | -0.82845800 | 4.87169500  |
| H | 1.66325100  | -2.37714100 | 5.22070000  |
| H | 0.72415700  | -0.86847600 | 5.23158600  |
| C | -0.14202800 | -2.29008000 | 3.07826900  |
| H | -0.93593200 | -1.72186200 | 3.58630100  |
| H | -0.13228400 | -3.30331700 | 3.51146800  |
| H | -0.41910100 | -2.36439400 | 2.02046000  |
| C | -0.04104500 | 0.02643100  | -2.19499100 |

Cartesian coordinates of the optimized geometry of **6** at PBE0-D3BJ/def2-SVP level of theory:

|    |             |             |             |
|----|-------------|-------------|-------------|
| Ga | 1.39261200  | -0.58185200 | -0.38827300 |
| Ga | -1.62785500 | 0.19308900  | -0.31691000 |
| P  | 0.95165800  | 1.14101500  | 1.16919700  |
| P  | -0.66218500 | 0.22710900  | 3.08768100  |
| Si | 1.55888000  | 2.26068200  | 4.06945400  |
| C  | -0.73243600 | 0.47384300  | 1.40882700  |
| C  | 1.13663100  | 0.76265800  | 2.99828100  |
| H  | 1.81540000  | -0.07712100 | 3.21635300  |
| C  | 0.24188700  | 3.57848700  | 3.82953400  |
| H  | 0.54127600  | 4.53079500  | 4.29555900  |
| H  | -0.71889200 | 3.27158300  | 4.26983100  |
| H  | 0.07107600  | 3.76380300  | 2.75714300  |
| C  | 3.23301500  | 2.98381500  | 3.59220300  |
| H  | 3.42764800  | 3.90508400  | 4.16478900  |
| H  | 3.25142600  | 3.24239000  | 2.52172000  |
| H  | 4.05787100  | 2.28316700  | 3.78883400  |
| C  | 1.60016200  | 1.68236200  | 5.86292500  |
| H  | 1.82215600  | 2.51144700  | 6.55371200  |
| H  | 2.36643100  | 0.90342400  | 6.00511300  |
| H  | 0.62723500  | 1.25199200  | 6.14976700  |
| O  | -0.22041500 | -0.53338800 | -1.22824400 |
| N  | 2.61829700  | -0.56188500 | -1.95027200 |
| N  | 2.15875000  | -2.25080800 | 0.38146600  |
| N  | -3.16265900 | -0.81714000 | -1.04580700 |
| N  | -2.38423000 | 1.96958200  | -0.79448900 |
| C  | 3.24365400  | -1.65902700 | -2.36833700 |
| C  | 3.25771900  | -2.87836100 | -1.67192900 |
| H  | 3.79090300  | -3.69428700 | -2.15788500 |
| C  | 2.87125000  | -3.11035800 | -0.34639800 |
| C  | 4.06852300  | -1.60550600 | -3.62512100 |
| H  | 4.35742700  | -2.61343900 | -3.94513500 |
| H  | 4.98410200  | -1.02385100 | -3.43748600 |
| H  | 3.54490400  | -1.09596600 | -4.44246800 |
| C  | 3.38997600  | -4.38066200 | 0.27329100  |
| H  | 3.33745800  | -5.19720000 | -0.46006800 |
| H  | 2.84429100  | -4.66576600 | 1.17922800  |

|   |             |             |             |
|---|-------------|-------------|-------------|
| H | 4.44896300  | -4.25339000 | 0.54477900  |
| C | 2.74397200  | 0.61832600  | -2.74712200 |
| C | 1.85409300  | 0.83624300  | -3.82415100 |
| C | 2.08138500  | 1.94271100  | -4.64889400 |
| H | 1.41159900  | 2.11792600  | -5.49459800 |
| C | 3.14311200  | 2.81200300  | -4.42527800 |
| H | 3.30562800  | 3.66356400  | -5.09016300 |
| C | 3.98546700  | 2.60159500  | -3.34058900 |
| H | 4.80473600  | 3.29953100  | -3.15054300 |
| C | 3.79896900  | 1.51530600  | -2.48049100 |
| C | 0.69978500  | -0.09961800 | -4.13950000 |
| H | 0.63726600  | -0.83098200 | -3.32349100 |
| C | 0.90221100  | -0.83917900 | -5.46296300 |
| H | 0.05473900  | -1.51707000 | -5.65083900 |
| H | 1.81744700  | -1.44875200 | -5.46900200 |
| H | 0.96106000  | -0.14088700 | -6.31369800 |
| C | -0.63599800 | 0.63942500  | -4.14289900 |
| H | -1.46214500 | -0.07014700 | -4.30329800 |
| H | -0.69046500 | 1.39918900  | -4.93932800 |
| H | -0.80860600 | 1.12866000  | -3.17718000 |
| C | 2.15734100  | -2.39782200 | 1.80360400  |
| C | 1.00076900  | -2.86100100 | 2.46631800  |
| C | 1.02697900  | -2.94059300 | 3.86179400  |
| H | 0.13808400  | -3.28023800 | 4.39340900  |
| C | 2.15981000  | -2.58969100 | 4.58718100  |
| H | 2.15271200  | -2.65246100 | 5.67774400  |
| C | 3.29747500  | -2.15614400 | 3.91964100  |
| H | 4.18607600  | -1.87911700 | 4.49206100  |
| C | 3.32085700  | -2.05233900 | 2.52501000  |
| C | -0.21882700 | -3.31925500 | 1.69153200  |
| H | -0.36419100 | -2.60931200 | 0.85820500  |
| C | -0.00190800 | -4.71111300 | 1.09178400  |
| H | -0.92189000 | -5.04973200 | 0.59445500  |
| H | 0.24678700  | -5.43546800 | 1.88416200  |
| H | 0.80040600  | -4.72915000 | 0.34486700  |
| C | -1.49359300 | -3.32687500 | 2.52205300  |
| H | -2.35779400 | -3.50084600 | 1.86934500  |
| H | -1.64101000 | -2.37193200 | 3.04570700  |
| H | -1.48327800 | -4.13486400 | 3.27160800  |
| C | 4.57607000  | -1.52665700 | 1.85292800  |
| H | 4.45503400  | -1.63008400 | 0.76477100  |
| C | 5.82498400  | -2.31108400 | 2.25470700  |
| H | 6.69413800  | -1.97542400 | 1.66794800  |
| H | 5.70129600  | -3.39237200 | 2.09452400  |
| H | 6.07135600  | -2.16291800 | 3.31773300  |
| C | 4.75692000  | -0.04005400 | 2.14730900  |
| H | 5.64951100  | 0.35382500  | 1.63758900  |
| H | 4.88260800  | 0.13391000  | 3.22737600  |
| H | 3.88752300  | 0.54447600  | 1.81600300  |
| C | -3.97460800 | -0.28865600 | -1.96351900 |
| C | -3.96778000 | 1.05572900  | -2.35828000 |
| H | -4.67990100 | 1.32291600  | -3.13716900 |
| C | -3.32698400 | 2.12871000  | -1.71933500 |
| C | -5.04917600 | -1.14736400 | -2.57273800 |
| H | -5.47027500 | -0.66620200 | -3.46338500 |
| H | -5.86107900 | -1.29020000 | -1.84227000 |
| H | -4.68614400 | -2.14892300 | -2.83173300 |
| C | -3.83533700 | 3.50517900  | -2.05738500 |
| H | -4.34134000 | 3.49595600  | -3.03102600 |
| H | -3.03890200 | 4.25681900  | -2.06141900 |
| H | -4.56257700 | 3.82802600  | -1.29713800 |
| C | -3.37481500 | -2.18445000 | -0.68919900 |
| C | -2.69633200 | -3.20796400 | -1.38723200 |
| C | -2.99124800 | -4.53444400 | -1.05378500 |
| H | -2.48531500 | -5.34026100 | -1.59163100 |
| C | -3.92141900 | -4.84747400 | -0.06931400 |
| H | -4.13656800 | -5.89146100 | 0.17049200  |
| C | -4.57583600 | -3.82620600 | 0.61033400  |

|   |             |             |             |
|---|-------------|-------------|-------------|
| H | -5.30231800 | -4.07501600 | 1.38735500  |
| C | -4.31936900 | -2.48461900 | 0.31513500  |
| C | -1.72440800 | -2.91922700 | -2.51790300 |
| H | -1.54766400 | -1.83588700 | -2.53094200 |
| C | -2.29088100 | -3.34878900 | -3.87246400 |
| H | -1.57645100 | -3.10788700 | -4.67533500 |
| H | -3.23682300 | -2.84140100 | -4.11095800 |
| H | -2.47653600 | -4.43469900 | -3.90851300 |
| C | -0.36159900 | -3.56296000 | -2.28310500 |
| H | 0.33162300  | -3.28788700 | -3.09252300 |
| H | -0.41681100 | -4.66330700 | -2.25279000 |
| H | 0.07793300  | -3.20852000 | -1.34373100 |
| C | -2.05161700 | 3.11903600  | -0.01020200 |
| C | -0.99806500 | 3.96212800  | -0.41018100 |
| C | -0.83479800 | 5.17525700  | 0.26672600  |
| H | -0.03659900 | 5.85422400  | -0.03746200 |
| C | -1.66326400 | 5.52593000  | 1.32519300  |
| H | -1.52650400 | 6.48265600  | 1.83466000  |
| C | -2.62714200 | 4.63052800  | 1.77303600  |
| H | -3.22413900 | 4.88335800  | 2.65063900  |
| C | -2.82795400 | 3.40427800  | 1.13363300  |
| C | -0.04590700 | 3.57535100  | -1.52674500 |
| H | -0.01481800 | 2.47275700  | -1.55262400 |
| C | -0.49515700 | 4.05817700  | -2.90702700 |
| H | 0.28470200  | 3.83495800  | -3.65001000 |
| H | -0.66214700 | 5.14782800  | -2.90432000 |
| H | -1.41734700 | 3.56917800  | -3.24634600 |
| C | 1.37146600  | 4.05983500  | -1.24602300 |
| H | 2.07146000  | 3.58980400  | -1.94827200 |
| H | 1.67633300  | 3.79639400  | -0.22370600 |
| H | 1.46517700  | 5.15054900  | -1.37168600 |
| C | -3.82578900 | 2.40259500  | 1.69407900  |
| H | -3.45961300 | 1.40565800  | 1.40150500  |
| C | -5.23754200 | 2.55694300  | 1.12571800  |
| H | -5.92787100 | 1.86002900  | 1.62729800  |
| H | -5.27992600 | 2.33623400  | 0.05038100  |
| H | -5.61950100 | 3.57828800  | 1.28584400  |
| C | -3.85889500 | 2.42969200  | 3.21958500  |
| H | -4.47781800 | 1.60434400  | 3.60003300  |
| H | -4.29388600 | 3.36361100  | 3.60839000  |
| H | -2.84861800 | 2.30982800  | 3.63712000  |
| C | 4.72067500  | 1.34653100  | -1.28706600 |
| H | 4.42808700  | 0.41868500  | -0.77307500 |
| C | 6.18494500  | 1.20204200  | -1.70009600 |
| C | 4.53697100  | 2.49985600  | -0.30039800 |
| H | 5.22190400  | 2.39992800  | 0.55432700  |
| H | 3.50817100  | 2.52427900  | 0.08646600  |
| H | 4.73840600  | 3.47118600  | -0.77885200 |
| H | 6.33127900  | 0.37123800  | -2.40673100 |
| H | 6.56199700  | 2.11779300  | -2.18219600 |
| H | 6.81675200  | 1.00987400  | -0.81862500 |
| C | -5.04041300 | -1.38983700 | 1.07854100  |
| H | -4.88443400 | -0.44806500 | 0.53186800  |
| C | -4.43526300 | -1.21163500 | 2.47052900  |
| H | -4.49368000 | -2.14607600 | 3.05062800  |
| H | -3.37649500 | -0.91881200 | 2.41982500  |
| H | -4.97347400 | -0.43254700 | 3.03049700  |
| C | -6.54752700 | -1.62336800 | 1.16183300  |
| H | -7.04370700 | -0.74977800 | 1.61230900  |
| H | -6.99067100 | -1.79013700 | 0.16803700  |
| H | -6.79497700 | -2.49565500 | 1.78688300  |

Cartesian coordinates of the optimized geometry of TMSCHN<sub>2</sub> at PBE0-D3BJ/def2-SVP level of theory:

|   |             |             |             |
|---|-------------|-------------|-------------|
| N | -2.06430000 | -0.41309400 | 0.00005900  |
| C | -0.90617800 | -0.98973900 | -0.00007600 |

|    |             |             |             |
|----|-------------|-------------|-------------|
| N  | -3.05810500 | 0.13592400  | 0.00010900  |
| Si | 0.67372800  | 0.01462700  | 0.00008000  |
| C  | 0.17735700  | 1.82653000  | 0.00109200  |
| H  | -0.41788600 | 2.08108200  | 0.89211500  |
| H  | 1.07249100  | 2.46831100  | 0.00115000  |
| H  | -0.41804300 | 2.08153900  | -0.88971400 |
| C  | 1.68062300  | -0.40612700 | 1.53173600  |
| H  | 1.92238200  | -1.48040600 | 1.56212500  |
| H  | 2.63083700  | 0.15200400  | 1.54312100  |
| H  | 1.12493200  | -0.15905200 | 2.44935300  |
| C  | 1.67927800  | -0.40448400 | -1.53294300 |
| H  | 1.12433200  | -0.15242900 | -2.44966700 |
| H  | 2.63150100  | 0.15023800  | -1.54270200 |
| H  | 1.91708800  | -1.47953400 | -1.56691300 |
| H  | -0.94947900 | -2.08343100 | -0.00001600 |

Cartesian coordinates of the optimized geometry of N<sub>2</sub> at PBE0-D3BJ/def2-SVP level of theory:

|   |            |            |             |
|---|------------|------------|-------------|
| N | 0.00000000 | 0.00000000 | 0.54887900  |
| N | 0.00000000 | 0.00000000 | -0.54887900 |

Cartesian coordinates of the optimized geometry of **S1** at PBE0-D3BJ/def2-SVP level of theory:

|    |             |             |             |
|----|-------------|-------------|-------------|
| Ga | -1.76190500 | 0.25604900  | -0.50868500 |
| Ga | 1.56644100  | 0.21090500  | -0.31922500 |
| P  | -0.04212500 | 0.81067300  | -1.77112400 |
| P  | 1.31103100  | -0.53641500 | 2.12033800  |
| O  | -1.27035800 | 0.49163600  | 1.67809900  |
| C  | -0.17535300 | 0.06381400  | 1.90568700  |
| N  | -2.52187600 | -1.48774600 | -0.11197500 |
| N  | -3.40637400 | 1.26301700  | -0.39080900 |
| N  | 2.79485700  | -1.24582200 | -0.78255700 |
| N  | 2.99350100  | 1.50819900  | 0.04047400  |
| C  | -3.74076800 | -1.63289600 | 0.39284900  |
| C  | -4.66178100 | -0.57990200 | 0.53093500  |
| H  | -5.62429000 | -0.84562800 | 0.96520400  |
| C  | -4.51837800 | 0.75996300  | 0.13497900  |
| C  | -4.18208000 | -2.99861700 | 0.83581300  |
| H  | -5.18808400 | -2.97000300 | 1.26987100  |
| H  | -3.48655500 | -3.40866900 | 1.58442500  |
| H  | -4.19015600 | -3.70195500 | -0.01186000 |
| C  | -5.70323300 | 1.66505600  | 0.31423400  |
| H  | -6.54536700 | 1.13236300  | 0.77050300  |
| H  | -6.03267200 | 2.07417300  | -0.65374600 |
| H  | -5.44446400 | 2.52502500  | 0.95150500  |
| C  | 4.01425400  | -1.30278300 | -0.26331100 |
| C  | 4.62825700  | -0.22383000 | 0.39701300  |
| H  | 5.61854100  | -0.41681600 | 0.80727800  |
| C  | 4.18649200  | 1.11294800  | 0.45632500  |
| C  | 4.80674700  | -2.57217300 | -0.40202300 |
| H  | 5.03237800  | -2.77731400 | -1.46072400 |
| H  | 4.23732500  | -3.43484500 | -0.02271200 |
| H  | 5.75584200  | -2.50847600 | 0.14294600  |
| C  | 5.14042500  | 2.13344900  | 1.00901600  |
| H  | 5.39862900  | 2.88187300  | 0.24320900  |
| H  | 6.06755700  | 1.66425600  | 1.35824000  |
| H  | 4.68228300  | 2.68007100  | 1.84812500  |
| C  | -3.34019600 | 2.65083400  | -0.80383300 |
| H  | -2.34037000 | 2.84323100  | -1.22018100 |
| H  | -4.08630200 | 2.88826000  | -1.58039500 |
| H  | -3.49456800 | 3.34206800  | 0.04210000  |
| C  | -1.63268600 | -2.62253100 | -0.24770500 |
| H  | -2.10330900 | -3.46156000 | -0.78527500 |
| H  | -0.75166400 | -2.30285000 | -0.82238200 |



|   |             |             |             |
|---|-------------|-------------|-------------|
| H | -1.27820400 | -2.98956400 | 0.73117000  |
| C | 2.61780300  | 2.90427300  | 0.06231200  |
| H | 1.63614300  | 3.00601700  | -0.42463300 |
| H | 2.53169500  | 3.29451400  | 1.09189500  |
| H | 3.33708100  | 3.53704600  | -0.48361700 |
| C | 2.25345000  | -2.34624100 | -1.54633500 |
| H | 1.98982500  | -3.20967000 | -0.90843100 |
| H | 1.33836800  | -1.99619300 | -2.04857700 |
| H | 2.95054300  | -2.69960200 | -2.32340000 |

Cartesian coordinates of the optimized geometry of **S2** at PBE0-D3BJ/def2-SVP level of theory:

|    |             |             |             |
|----|-------------|-------------|-------------|
| Ga | 1.55863800  | -0.23105700 | -0.23811300 |
| Ga | -1.55859700 | 0.23103500  | -0.23805600 |
| P  | 1.24812400  | -1.08689900 | -2.44515800 |
| P  | -1.24831900 | 1.08670200  | -2.44522100 |
| O  | 0.00006200  | 0.00017500  | 0.63824500  |
| N  | 2.71751700  | 1.32425800  | -0.15797600 |
| N  | 2.68439200  | -1.45362900 | 0.76362300  |
| N  | -2.71741600 | -1.32430500 | -0.15770400 |
| N  | -2.68435100 | 1.45366100  | 0.76362800  |
| C  | 3.85862900  | 1.32839700  | 0.51556700  |
| C  | 4.37131500  | 0.21575900  | 1.20920400  |
| H  | 5.31864500  | 0.37488500  | 1.72191400  |
| C  | 3.82728000  | -1.07571900 | 1.32103200  |
| C  | 4.67276900  | 2.59121600  | 0.54484800  |
| H  | 4.97126600  | 2.88673300  | -0.47330600 |
| H  | 5.57825400  | 2.46696800  | 1.14960600  |
| H  | 4.08625800  | 3.42625600  | 0.95878600  |
| C  | 4.60190600  | -2.08192300 | 2.12500000  |
| H  | 4.88432400  | -2.94627500 | 1.50348100  |
| H  | 3.99299400  | -2.47175600 | 2.95569900  |
| H  | 5.51518500  | -1.64064400 | 2.54005900  |
| C  | -3.85868000 | -1.32830800 | 0.51559100  |
| C  | -4.37145900 | -0.21558600 | 1.20901300  |
| H  | -5.31890600 | -0.37461500 | 1.72153400  |
| C  | -3.82733300 | 1.07585200  | 1.32091300  |
| C  | -4.67285300 | -2.59110600 | 0.54483900  |
| H  | -4.97068200 | -2.88704800 | -0.47338500 |
| H  | -5.57872200 | -2.46662400 | 1.14897300  |
| H  | -4.08660300 | -3.42597300 | 0.95950500  |
| C  | -4.60194900 | 2.08209100  | 2.12484100  |
| H  | -4.88441500 | 2.94641500  | 1.50330100  |
| H  | -3.99300000 | 2.47197500  | 2.95548700  |
| H  | -5.51521100 | 1.64082200  | 2.53994800  |
| C  | -0.00010200 | -0.00010000 | -2.45555500 |
| C  | 2.27031100  | 2.50150700  | -0.87435600 |
| H  | 1.33203600  | 2.27593700  | -1.40045200 |
| H  | 2.08003200  | 3.35114700  | -0.19579000 |
| H  | 3.00171400  | 2.82904500  | -1.63195100 |
| C  | 2.18470700  | -2.80098200 | 0.92733200  |
| H  | 2.90305300  | -3.56087000 | 0.57606900  |
| H  | 1.93329600  | -3.02648600 | 1.97786000  |
| H  | 1.26562500  | -2.91823300 | 0.33646000  |
| C  | -2.18453800 | 2.80095700  | 0.92742600  |
| H  | -2.90331100 | 3.56099900  | 0.57740700  |
| H  | -1.93190700 | 3.02590900  | 1.97778900  |
| H  | -1.26614400 | 2.91854200  | 0.33554700  |
| C  | -2.27009500 | -2.50170500 | -0.87376000 |
| H  | -1.33141400 | -2.27644400 | -1.39926500 |
| H  | -2.08055500 | -3.35140700 | -0.19507200 |
| H  | -3.00109500 | -2.82901300 | -1.63185300 |

Cartesian coordinates of the optimized geometry of Int-1 at PBE0-D3BJ/def2-SVP level of theory:

|    |             |             |             |
|----|-------------|-------------|-------------|
| Ga | 2.04491800  | 0.60548500  | 0.35680500  |
| Ga | -2.16856200 | -0.71794800 | 0.62925200  |
| P  | 0.14841100  | -0.61536800 | -0.06477500 |
| P  | -1.22086600 | -0.62474600 | 2.73179600  |
| O  | 1.28963100  | 0.34227300  | 2.13147500  |
| N  | 2.85453100  | 2.32342500  | 0.03378300  |
| N  | 3.71379500  | -0.41912500 | 0.50682200  |
| N  | -2.87147000 | -2.28442700 | -0.35225000 |
| N  | -3.70802900 | 0.44303000  | 0.19831300  |
| C  | 4.14958300  | 2.55614500  | 0.29538600  |
| C  | 5.07712500  | 1.56406300  | 0.61208200  |
| H  | 6.09456800  | 1.90701500  | 0.79569600  |
| C  | 4.89266900  | 0.16397800  | 0.64316000  |
| C  | 4.64525300  | 3.97124700  | 0.21075300  |
| H  | 5.67573600  | 4.04750400  | 0.57673500  |
| H  | 3.99778700  | 4.64087700  | 0.79529200  |
| H  | 4.61082800  | 4.33598800  | -0.82683400 |
| C  | 6.12985700  | -0.66154100 | 0.85297000  |
| H  | 5.98057500  | -1.71030700 | 0.57010100  |
| H  | 6.40742800  | -0.63287700 | 1.91789200  |
| H  | 6.96881100  | -0.23934200 | 0.28370000  |
| C  | 2.05174200  | 3.37191400  | -0.51084700 |
| C  | 2.16082700  | 3.66100700  | -1.88943400 |
| C  | 1.38905100  | 4.70254800  | -2.40661000 |
| H  | 1.45800400  | 4.94788900  | -3.46836600 |
| C  | 0.51970400  | 5.42351600  | -1.59219500 |
| H  | -0.07943900 | 6.23301400  | -2.01660500 |
| C  | 0.40394500  | 5.10453100  | -0.24585700 |
| H  | -0.29436600 | 5.65892800  | 0.38506900  |
| C  | 1.16929200  | 4.08071800  | 0.32365900  |
| C  | 3.04412700  | 2.82254000  | -2.79629000 |
| H  | 3.82097900  | 2.35660100  | -2.17157300 |
| C  | 3.75996500  | 3.63706400  | -3.86932700 |
| H  | 4.46914900  | 3.00055200  | -4.42028000 |
| H  | 4.32352200  | 4.47691800  | -3.43445600 |
| H  | 3.05790800  | 4.05233400  | -4.60904300 |
| C  | 2.23291500  | 1.68400500  | -3.41916000 |
| H  | 1.46346900  | 2.08074000  | -4.09952400 |
| H  | 1.71328600  | 1.08992700  | -2.65176700 |
| H  | 2.88400800  | 1.00760200  | -3.99487800 |
| C  | 1.03078300  | 3.75675400  | 1.79635000  |
| H  | 1.75596600  | 2.96575600  | 2.03565200  |
| C  | 1.36182400  | 4.96025700  | 2.67790900  |
| H  | 2.37362300  | 5.34770400  | 2.48012000  |
| H  | 1.30811800  | 4.67964300  | 3.74098300  |
| H  | 0.65119900  | 5.78678500  | 2.51796000  |
| C  | -0.35733400 | 3.20183100  | 2.10499800  |
| H  | -0.61345900 | 2.36193500  | 1.44320700  |
| H  | -1.13538100 | 3.96959900  | 1.97991700  |
| H  | -0.40149800 | 2.82563000  | 3.13719000  |
| C  | 3.55981300  | -1.84047800 | 0.53171800  |
| C  | 3.35250500  | -2.49898800 | -0.69928600 |
| C  | 3.16292400  | -3.88075900 | -0.68874700 |
| H  | 2.99178500  | -4.40745700 | -1.62851300 |
| C  | 3.16868600  | -4.59362000 | 0.50533000  |
| H  | 3.01571700  | -5.67547300 | 0.49693000  |
| C  | 3.34466700  | -3.92529400 | 1.70853800  |
| H  | 3.32009100  | -4.48748600 | 2.64500200  |
| C  | 3.53038100  | -2.53910800 | 1.75476900  |
| C  | 3.35450900  | -1.72298200 | -2.00107600 |
| H  | 2.97207500  | -0.71490700 | -1.77207700 |
| C  | 4.77186300  | -1.55089100 | -2.54829800 |
| H  | 5.22279900  | -2.53052500 | -2.77380400 |
| H  | 5.42888900  | -1.03726900 | -1.83185100 |
| H  | 4.76184300  | -0.95962500 | -3.47794300 |
| C  | 2.42184900  | -2.31558700 | -3.04823900 |

|   |             |             |             |
|---|-------------|-------------|-------------|
| H | 1.42423600  | -2.49785700 | -2.62483900 |
| H | 2.80352600  | -3.26817100 | -3.44930100 |
| H | 2.31812300  | -1.62453000 | -3.89886700 |
| C | 3.68009700  | -1.86160100 | 3.10425600  |
| H | 3.77333600  | -0.77933500 | 2.93010300  |
| C | 4.93210700  | -2.34724400 | 3.83925500  |
| H | 4.84062100  | -3.40998900 | 4.11463200  |
| H | 5.07689600  | -1.77829900 | 4.77090700  |
| H | 5.84244100  | -2.24623000 | 3.23092600  |
| C | 2.44217300  | -2.06893600 | 3.97743300  |
| H | 1.53330600  | -1.70005700 | 3.48667600  |
| H | 2.55351600  | -1.52356700 | 4.92739000  |
| H | 2.29758400  | -3.13399700 | 4.21931000  |
| C | -4.17815400 | -2.45809900 | -0.53226900 |
| C | -5.12692700 | -1.44381500 | -0.33637800 |
| H | -6.16422200 | -1.72350900 | -0.51315000 |
| C | -4.89325800 | -0.07455900 | -0.12076400 |
| C | -4.67798500 | -3.78749300 | -1.02231900 |
| H | -4.37666700 | -3.95590300 | -2.06595000 |
| H | -5.77134900 | -3.84266200 | -0.95930500 |
| H | -4.23313500 | -4.60503000 | -0.43826000 |
| C | -6.07920500 | 0.83725300  | -0.26919000 |
| H | -5.81126100 | 1.76245600  | -0.79672800 |
| H | -6.45079700 | 1.13573500  | 0.72172000  |
| H | -6.89220300 | 0.33305600  | -0.80452600 |
| C | -1.96264700 | -3.23541300 | -0.90655800 |
| C | -1.67266600 | -3.16165200 | -2.28739800 |
| C | -0.81449100 | -4.11556100 | -2.83853600 |
| H | -0.58588300 | -4.07575600 | -3.90680000 |
| C | -0.23342500 | -5.10213100 | -2.04962800 |
| H | 0.43628300  | -5.84004600 | -2.49819400 |
| C | -0.49273900 | -5.13144600 | -0.68581800 |
| H | -0.01324100 | -5.88905900 | -0.06165600 |
| C | -1.35119900 | -4.20397800 | -0.08760800 |
| C | -2.22217100 | -2.05822800 | -3.17499300 |
| H | -2.87153100 | -1.42103200 | -2.55696400 |
| C | -3.06675300 | -2.59672900 | -4.32970500 |
| H | -2.46470100 | -3.21495100 | -5.01441700 |
| H | -3.48935800 | -1.76671300 | -4.91742200 |
| H | -3.90454200 | -3.21511500 | -3.97537400 |
| C | -1.09068500 | -1.17689700 | -3.70430900 |
| H | -0.50161700 | -0.74893300 | -2.87995800 |
| H | -1.49487200 | -0.34843800 | -4.30593500 |
| H | -0.40373600 | -1.74970400 | -4.34638500 |
| C | -1.58201700 | -4.26094300 | 1.40840100  |
| H | -2.17764000 | -3.37863600 | 1.68677600  |
| C | -2.36928500 | -5.50614000 | 1.81643600  |
| H | -1.81968300 | -6.42727500 | 1.56328300  |
| H | -3.34871100 | -5.55667300 | 1.31639700  |
| H | -2.54687000 | -5.51075600 | 2.90319100  |
| C | -0.26184500 | -4.16306000 | 2.16849100  |
| H | 0.35621200  | -5.06407500 | 2.02544200  |
| H | -0.44790900 | -4.04316700 | 3.24635400  |
| H | 0.31997600  | -3.29443100 | 1.83050400  |
| C | -3.56403800 | 1.86071700  | 0.30422200  |
| C | -2.99349000 | 2.54953900  | -0.78801400 |
| C | -2.90684500 | 3.94189700  | -0.72579600 |
| H | -2.47163300 | 4.48880600  | -1.56325800 |
| C | -3.36363200 | 4.63959700  | 0.38659900  |
| H | -3.29800800 | 5.73016900  | 0.41514400  |
| C | -3.88374500 | 3.94398100  | 1.46980400  |
| H | -4.21394500 | 4.49448300  | 2.35400900  |
| C | -3.98600500 | 2.54875400  | 1.46153300  |
| C | -2.53193100 | 1.80581800  | -2.02617200 |
| H | -2.24891800 | 0.79094100  | -1.70648200 |
| C | -3.66511800 | 1.66724000  | -3.04408400 |
| H | -3.31745700 | 1.13329600  | -3.94246100 |
| H | -4.03199300 | 2.65713600  | -3.36018000 |

|   |             |             |             |
|---|-------------|-------------|-------------|
| H | -4.51734900 | 1.10544900  | -2.63542000 |
| C | -1.29290400 | 2.42755000  | -2.65345000 |
| H | -0.48921800 | 2.54060600  | -1.91210500 |
| H | -1.49405300 | 3.41864000  | -3.08859100 |
| H | -0.91919000 | 1.78721700  | -3.46486000 |
| C | -4.52231300 | 1.84907600  | 2.69734100  |
| H | -4.60697300 | 0.77556500  | 2.46681700  |
| C | -5.90411100 | 2.36375900  | 3.10724300  |
| H | -6.63161300 | 2.33600600  | 2.28222900  |
| H | -5.85308000 | 3.40593500  | 3.45963200  |
| H | -6.30597200 | 1.75992200  | 3.93536900  |
| C | -3.54428900 | 1.99034000  | 3.86463100  |
| H | -3.92806800 | 1.46407900  | 4.75279900  |
| H | -3.40265900 | 3.04950200  | 4.13388400  |
| H | -2.56572900 | 1.55454400  | 3.61471900  |
| C | 0.17874800  | -0.23075800 | 1.73236800  |

Cartesian coordinates of the optimized geometry of Int-2 at PBE0-D3BJ/def2-SVP level of theory:

|    |             |             |             |
|----|-------------|-------------|-------------|
| Ga | 2.04648900  | -0.14686100 | -0.31914800 |
| Ga | -2.05755200 | 0.14196600  | -0.32445000 |
| P  | 1.50413000  | -0.54795700 | -2.47575200 |
| P  | -1.51485000 | 0.53240200  | -2.48233000 |
| O  | -0.00555800 | 0.00123500  | -0.31496900 |
| N  | 3.03276300  | 1.56430600  | -0.06669400 |
| N  | 2.75234100  | -0.98959900 | 1.30202700  |
| N  | -3.02836200 | -1.57729700 | -0.05726000 |
| N  | -2.75883200 | 0.99063900  | 1.29356800  |
| C  | 3.76257400  | 1.85285100  | 0.99927400  |
| C  | 3.91053300  | 0.98366900  | 2.09744400  |
| H  | 4.52051000  | 1.36224300  | 2.91668300  |
| C  | 3.52926000  | -0.35492100 | 2.19282000  |
| C  | 4.56846500  | 3.12143300  | 1.06101900  |
| H  | 5.63430100  | 2.88436700  | 0.92215700  |
| H  | 4.46491200  | 3.57748700  | 2.05587000  |
| H  | 4.27844300  | 3.84346300  | 0.29049300  |
| C  | 4.06351400  | -1.12213000 | 3.37171000  |
| H  | 4.50718800  | -2.07598400 | 3.05331000  |
| H  | 3.25822600  | -1.37365400 | 4.07634800  |
| H  | 4.81916100  | -0.53329000 | 3.90428300  |
| C  | 3.19675600  | 2.33739700  | -1.26342000 |
| C  | 4.29677000  | 2.06079200  | -2.10076500 |
| C  | 4.44759300  | 2.81816800  | -3.26528700 |
| H  | 5.29365400  | 2.61772500  | -3.92740300 |
| C  | 3.53191400  | 3.80526400  | -3.60413300 |
| H  | 3.66287900  | 4.38359400  | -4.52172600 |
| C  | 2.43576000  | 4.04037700  | -2.78255100 |
| H  | 1.70571000  | 4.80051800  | -3.06515200 |
| C  | 2.24149600  | 3.31291400  | -1.60614700 |
| C  | 5.29176200  | 0.95076300  | -1.81256100 |
| H  | 4.99282600  | 0.45896500  | -0.87394300 |
| C  | 6.71104700  | 1.48454400  | -1.61570400 |
| H  | 7.39737900  | 0.66858100  | -1.33930900 |
| H  | 6.75720300  | 2.25027500  | -0.82773600 |
| H  | 7.09555500  | 1.94200100  | -2.54094300 |
| C  | 5.26109200  | -0.10917900 | -2.91433800 |
| H  | 5.59863100  | 0.30784400  | -3.87598400 |
| H  | 4.24410500  | -0.50062800 | -3.06356500 |
| H  | 5.93102900  | -0.94663200 | -2.66416200 |
| C  | 1.05438400  | 3.60431000  | -0.71218000 |
| H  | 0.82970000  | 2.67897500  | -0.16032600 |
| C  | 1.39639400  | 4.69186800  | 0.30847700  |
| H  | 2.22314200  | 4.39916500  | 0.97031600  |
| H  | 0.52143400  | 4.91188700  | 0.93702200  |
| H  | 1.69180200  | 5.62177100  | -0.20409000 |
| C  | -0.20340600 | 3.98108500  | -1.48501100 |

|   |             |             |             |
|---|-------------|-------------|-------------|
| H | -0.44619400 | 3.22228700  | -2.24306600 |
| H | -0.10958700 | 4.96529200  | -1.97212200 |
| H | -1.05369100 | 4.04291400  | -0.79165000 |
| C | 2.55491900  | -2.39729400 | 1.45610300  |
| C | 3.30485000  | -3.28006500 | 0.64822400  |
| C | 3.15547200  | -4.65421600 | 0.85655800  |
| H | 3.73004600  | -5.35317800 | 0.24665900  |
| C | 2.28627400  | -5.14648800 | 1.82281400  |
| H | 2.18644500  | -6.22411300 | 1.97153800  |
| C | 1.53203200  | -4.26403000 | 2.58666500  |
| H | 0.83676100  | -4.65698500 | 3.33173600  |
| C | 1.64403200  | -2.88121300 | 2.41812300  |
| C | 4.28372500  | -2.76680000 | -0.39209000 |
| H | 3.91182100  | -1.78900300 | -0.73767800 |
| C | 5.66814600  | -2.53598100 | 0.21528800  |
| H | 6.07878700  | -3.47297900 | 0.62468100  |
| H | 5.64005000  | -1.79460800 | 1.02711700  |
| H | 6.36878300  | -2.16418000 | -0.54860600 |
| C | 4.35620100  | -3.65051800 | -1.63208000 |
| H | 3.35552100  | -3.81603200 | -2.05704900 |
| H | 4.81503500  | -4.62941200 | -1.42141600 |
| H | 4.97050400  | -3.16356800 | -2.40325300 |
| C | 0.77835000  | -1.95031500 | 3.24627600  |
| H | 1.20911600  | -0.94219100 | 3.17218200  |
| C | 0.73156600  | -2.33039500 | 4.72505500  |
| H | 0.18194000  | -3.27050100 | 4.88793200  |
| H | 0.21139700  | -1.54906800 | 5.30085500  |
| H | 1.73696900  | -2.45825800 | 5.15517400  |
| C | -0.63075200 | -1.86916600 | 2.66664500  |
| H | -0.61002400 | -1.47450400 | 1.64223700  |
| H | -1.26914200 | -1.21349100 | 3.27648000  |
| H | -1.10669500 | -2.86057600 | 2.63826300  |
| C | -3.75613300 | -1.85970000 | 1.01215700  |
| C | -3.91434000 | -0.97929600 | 2.10021800  |
| H | -4.52733100 | -1.35218200 | 2.91976600  |
| C | -3.54322400 | 0.36330200  | 2.18219800  |
| C | -4.55390100 | -3.13260900 | 1.08277200  |
| H | -5.61411600 | -2.90981200 | 0.88743700  |
| H | -4.49117400 | -3.55558200 | 2.09524400  |
| H | -4.22595600 | -3.87588200 | 0.34824100  |
| C | -4.10147300 | 1.14752200  | 3.33768600  |
| H | -4.59814300 | 2.06179600  | 2.98214400  |
| H | -3.30425500 | 1.47484900  | 4.01956300  |
| H | -4.82083200 | 0.54451700  | 3.90342900  |
| C | -3.19335900 | -2.35929900 | -1.24833200 |
| C | -4.32081700 | -2.12304000 | -2.06134100 |
| C | -4.46180300 | -2.87296800 | -3.23209100 |
| H | -5.32698400 | -2.69959200 | -3.87686400 |
| C | -3.51309900 | -3.81748300 | -3.59860200 |
| H | -3.63563700 | -4.38922500 | -4.52146900 |
| C | -2.39668400 | -4.02067200 | -2.79590200 |
| H | -1.64437700 | -4.75059200 | -3.09805500 |
| C | -2.21059500 | -3.29942600 | -1.61463500 |
| C | -5.35454900 | -1.05638100 | -1.74732500 |
| H | -5.09414000 | -0.59884700 | -0.78043700 |
| C | -6.76341300 | -1.63500400 | -1.61305400 |
| H | -7.11754600 | -2.05021600 | -2.56964700 |
| H | -7.47606900 | -0.85199100 | -1.30973600 |
| H | -6.80756600 | -2.44391300 | -0.86892600 |
| C | -5.32349300 | 0.05208500  | -2.80025500 |
| H | -4.31248900 | 0.47072500  | -2.90950700 |
| H | -6.01706800 | 0.86375400  | -2.52953900 |
| H | -5.62782900 | -0.33192200 | -3.78650600 |
| C | -1.00776900 | -3.56698100 | -0.73417900 |
| H | -0.76773600 | -2.62545000 | -0.21598400 |
| C | -1.34095300 | -4.62106600 | 0.32397100  |
| H | -1.64914900 | -5.56360100 | -0.15699500 |
| H | -2.15587600 | -4.30343500 | 0.98859600  |

|   |             |             |             |
|---|-------------|-------------|-------------|
| H | -0.45850100 | -4.82739400 | 0.94624900  |
| C | 0.23586400  | -3.97990000 | -1.51133600 |
| H | 0.12575500  | -4.97863500 | -1.96455000 |
| H | 1.09276200  | -4.02873700 | -0.82515800 |
| H | 0.47939400  | -3.24733300 | -2.29432100 |
| C | -2.56395400 | 2.40041200  | 1.43533200  |
| C | -3.32226600 | 3.28053600  | 0.63475700  |
| C | -3.16269100 | 4.65653700  | 0.82804300  |
| H | -3.74931000 | 5.35102100  | 0.22262300  |
| C | -2.27502700 | 5.15427200  | 1.77274600  |
| H | -2.16624600 | 6.23262300  | 1.90938900  |
| C | -1.51659800 | 4.27347200  | 2.53581500  |
| H | -0.81039900 | 4.66896900  | 3.26924100  |
| C | -1.64094300 | 2.89045700  | 2.38430000  |
| C | -4.32823200 | 2.78745800  | -0.38849300 |
| H | -4.17260800 | 1.70557600  | -0.51865600 |
| C | -5.75931000 | 2.97389600  | 0.11744100  |
| H | -6.48299900 | 2.57814100  | -0.61233900 |
| H | -5.98944500 | 4.03969800  | 0.27581800  |
| H | -5.92370500 | 2.45063700  | 1.07173300  |
| C | -4.11982400 | 3.43268800  | -1.75592200 |
| H | -3.10930500 | 3.22177100  | -2.13558100 |
| H | -4.26083300 | 4.52428100  | -1.72175000 |
| H | -4.84232400 | 3.03049900  | -2.48103400 |
| C | -0.77968300 | 1.96380100  | 3.22158200  |
| H | -1.21325000 | 0.95635500  | 3.15387600  |
| C | -0.73842300 | 2.35495900  | 4.69773600  |
| H | -1.74564700 | 2.48417000  | 5.12320300  |
| H | -0.19082800 | 3.29704400  | 4.85594800  |
| H | -0.21974800 | 1.57830800  | 5.28120100  |
| C | 0.63113100  | 1.87557300  | 2.64754700  |
| H | 1.26893000  | 1.23024000  | 3.26887800  |
| H | 1.10633600  | 2.86706700  | 2.60416600  |
| H | 0.61204700  | 1.46485800  | 1.62951600  |
| C | -0.00492600 | -0.00424500 | -1.73244900 |

Cartesian coordinates of the optimized geometry of Int-3 at PBE0-D3BJ/def2-SVP level of theory:

|    |             |             |             |
|----|-------------|-------------|-------------|
| Ga | -1.74463700 | 0.27542500  | 0.26649900  |
| Ga | 0.92266600  | -1.09171200 | 0.19129700  |
| P  | -0.34884600 | 1.40766200  | -1.23237500 |
| P  | 2.72860600  | 1.32354600  | -0.81186700 |
| O  | -0.76969500 | -1.15032300 | 0.84865100  |
| N  | -2.28732100 | 1.73635300  | 1.54515200  |
| N  | -3.57179800 | -0.52823600 | 0.25472900  |
| N  | 1.88852300  | -2.10808300 | 1.60030900  |
| N  | 1.49370500  | -2.33209600 | -1.27692200 |
| N  | 2.17859300  | 2.58056100  | -3.12948100 |
| C  | -3.31294400 | 1.61487500  | 2.37751500  |
| C  | -4.19964900 | 0.52730700  | 2.34772300  |
| H  | -4.95038400 | 0.50533200  | 3.13619400  |
| C  | -4.38007000 | -0.39711500 | 1.30860700  |
| C  | -3.64049300 | 2.71021600  | 3.35643700  |
| H  | -4.06218100 | 2.27907700  | 4.27457600  |
| H  | -4.40561200 | 3.37233700  | 2.92278100  |
| H  | -2.77141100 | 3.32995400  | 3.60396300  |
| C  | -5.61775500 | -1.24958500 | 1.39563500  |
| H  | -5.35257800 | -2.30948300 | 1.49704700  |
| H  | -6.21664100 | -1.17001900 | 0.47759700  |
| H  | -6.23363400 | -0.95475600 | 2.25294900  |
| C  | -1.65008700 | 3.00803700  | 1.42307400  |
| C  | -0.42587700 | 3.24801500  | 2.07959800  |
| C  | 0.14095000  | 4.52079800  | 1.98053100  |
| H  | 1.07624500  | 4.72697000  | 2.50285000  |
| C  | -0.45940700 | 5.52562800  | 1.22906900  |
| H  | -0.00113400 | 6.51636000  | 1.17011900  |

|   |             |             |             |
|---|-------------|-------------|-------------|
| C | -1.63897700 | 5.25868600  | 0.54706400  |
| H | -2.09787600 | 6.03981800  | -0.06450700 |
| C | -2.25290600 | 4.00560000  | 0.62774700  |
| C | 0.25759400  | 2.16888600  | 2.89214700  |
| H | -0.01126800 | 1.20249100  | 2.43397400  |
| C | -0.23225300 | 2.15239000  | 4.34108400  |
| H | 0.31758300  | 1.39214600  | 4.91503600  |
| H | -1.30161600 | 1.91630900  | 4.41707500  |
| H | -0.06260200 | 3.13191600  | 4.81731900  |
| C | 1.77539100  | 2.27638100  | 2.85329900  |
| H | 2.14183000  | 3.17119700  | 3.38218600  |
| H | 2.14469400  | 2.29727300  | 1.81724600  |
| H | 2.21780800  | 1.40617600  | 3.35231000  |
| C | -3.51089400 | 3.75378600  | -0.18147900 |
| H | -3.83856400 | 2.72315900  | 0.01934700  |
| C | -4.65379900 | 4.68907600  | 0.21275600  |
| H | -4.88295800 | 4.62841000  | 1.28665700  |
| H | -5.57028400 | 4.43608400  | -0.34289400 |
| H | -4.40946300 | 5.73916600  | -0.01335300 |
| C | -3.21542500 | 3.86219700  | -1.67803000 |
| H | -2.90387800 | 4.88408400  | -1.94718800 |
| H | -4.11254900 | 3.62416400  | -2.26940200 |
| H | -2.40532700 | 3.17950600  | -1.97600500 |
| C | -3.97581400 | -1.43978500 | -0.76768300 |
| C | -3.74754300 | -2.82605300 | -0.62495600 |
| C | -4.27539900 | -3.68392000 | -1.59670100 |
| H | -4.11559000 | -4.76040900 | -1.49601600 |
| C | -4.98957400 | -3.19766100 | -2.68321200 |
| H | -5.39865100 | -3.88697500 | -3.42570800 |
| C | -5.15971000 | -1.82554500 | -2.83761200 |
| H | -5.69229700 | -1.44872300 | -3.71194700 |
| C | -4.65303200 | -0.92459400 | -1.89756900 |
| C | -2.93842500 | -3.41757900 | 0.51615200  |
| H | -2.62664200 | -2.59267400 | 1.17203000  |
| C | -3.71287500 | -4.45217700 | 1.33375800  |
| H | -3.09596200 | -4.80226900 | 2.17641200  |
| H | -3.97291500 | -5.33629500 | 0.72962000  |
| H | -4.64944700 | -4.05665000 | 1.75350200  |
| C | -1.65128200 | -4.04284300 | -0.01714600 |
| H | -1.02173900 | -4.39413000 | 0.81399700  |
| H | -1.06742600 | -3.30356600 | -0.57633100 |
| H | -1.86033900 | -4.90334600 | -0.67431300 |
| C | -4.82484700 | 0.57405000  | -2.08782800 |
| H | -3.89936200 | 1.04277000  | -1.71221300 |
| C | -5.98907800 | 1.13950200  | -1.27040800 |
| H | -5.83098400 | 1.03700300  | -0.18885000 |
| H | -6.93136500 | 0.63191700  | -1.53259900 |
| H | -6.11776500 | 2.21256200  | -1.48190700 |
| C | -4.97968900 | 0.97858600  | -3.55102000 |
| H | -4.18389000 | 0.55707900  | -4.18131700 |
| H | -4.93728700 | 2.07365800  | -3.64413700 |
| H | -5.94991400 | 0.65894000  | -3.96326500 |
| C | 2.07917300  | -3.41853200 | 1.46512100  |
| C | 1.87645600  | -4.13252900 | 0.27366500  |
| H | 2.01157700  | -5.21130900 | 0.34250600  |
| C | 1.69885600  | -3.62330700 | -1.01816500 |
| C | 2.54781300  | -4.22833800 | 2.64376600  |
| H | 2.96711600  | -5.18559600 | 2.31222600  |
| H | 1.70140800  | -4.43742200 | 3.31314100  |
| H | 3.29589900  | -3.68860400 | 3.23865400  |
| C | 1.74177900  | -4.63642400 | -2.13278100 |
| H | 2.51011700  | -5.39845800 | -1.94955200 |
| H | 1.90753500  | -4.17941100 | -3.11464900 |
| H | 0.77063700  | -5.15610700 | -2.15381200 |
| C | 2.17177600  | -1.51274900 | 2.86561500  |
| C | 3.41855700  | -0.87017500 | 3.03440300  |
| C | 3.74927800  | -0.37843400 | 4.29924300  |
| H | 4.71391600  | 0.10924000  | 4.45094000  |

|    |             |             |             |
|----|-------------|-------------|-------------|
| C  | 2.85823800  | -0.48125500 | 5.36278900  |
| H  | 3.12973300  | -0.08722300 | 6.34502500  |
| C  | 1.61457000  | -1.06837800 | 5.16605500  |
| H  | 0.91129400  | -1.12943600 | 6.00049500  |
| C  | 1.24153200  | -1.59883500 | 3.92533300  |
| C  | 4.38349700  | -0.73484300 | 1.87150100  |
| H  | 3.77069300  | -0.67668600 | 0.95702600  |
| C  | 5.28367700  | -1.96438400 | 1.73766900  |
| H  | 5.85681900  | -2.13159500 | 2.66385800  |
| H  | 6.00295000  | -1.82859400 | 0.91538300  |
| H  | 4.70759900  | -2.87507300 | 1.52323900  |
| C  | 5.21505400  | 0.54204900  | 1.92286800  |
| H  | 5.96200900  | 0.51949400  | 2.73253100  |
| H  | 4.57803600  | 1.42774700  | 2.05953600  |
| H  | 5.76073200  | 0.66691100  | 0.97540600  |
| C  | -0.12395900 | -2.25107600 | 3.78145100  |
| H  | -0.20087700 | -2.64336500 | 2.75741300  |
| C  | -0.33196200 | -3.39223100 | 4.78021500  |
| H  | 0.47786600  | -4.13609300 | 4.75946200  |
| H  | -1.27661600 | -3.91577700 | 4.56437100  |
| H  | -0.39730000 | -3.01518300 | 5.81343800  |
| C  | -1.25216700 | -1.23260100 | 3.93204500  |
| H  | -2.22696500 | -1.72077100 | 3.77861800  |
| H  | -1.16470500 | -0.44424100 | 3.17732700  |
| H  | -1.25652800 | -0.77766900 | 4.93564800  |
| C  | 1.79227000  | -1.82699800 | -2.58095500 |
| C  | 3.14940200  | -1.59185800 | -2.91369000 |
| C  | 3.44812400  | -1.13062500 | -4.19835500 |
| H  | 4.48944000  | -0.95331900 | -4.47363400 |
| C  | 2.44514200  | -0.88054000 | -5.12704500 |
| H  | 2.69897300  | -0.51842600 | -6.12619900 |
| C  | 1.11738700  | -1.07391900 | -4.77116200 |
| H  | 0.33086900  | -0.85669800 | -5.49564200 |
| C  | 0.76360600  | -1.54143400 | -3.50107800 |
| C  | 4.28198200  | -1.82822800 | -1.92652300 |
| H  | 3.84751800  | -1.73734200 | -0.91856900 |
| C  | 4.88620400  | -3.22918700 | -2.05001200 |
| H  | 5.72443100  | -3.34625300 | -1.34524000 |
| H  | 5.27437900  | -3.39580400 | -3.06787800 |
| H  | 4.16134400  | -4.02120100 | -1.83147600 |
| C  | 5.39653700  | -0.79093800 | -2.04798200 |
| H  | 6.10123900  | -0.89613300 | -1.20866900 |
| H  | 4.98819800  | 0.22880700  | -2.02615700 |
| H  | 5.98056800  | -0.92280600 | -2.97258200 |
| C  | -0.69776700 | -1.77409100 | -3.17671000 |
| H  | -0.80677700 | -1.70429500 | -2.08182900 |
| C  | -1.15616000 | -3.16790700 | -3.60803500 |
| H  | -0.58757700 | -3.96268200 | -3.11185700 |
| H  | -1.03274600 | -3.29439300 | -4.69593600 |
| H  | -2.21857800 | -3.31018700 | -3.36199100 |
| C  | -1.61368800 | -0.72396600 | -3.79316100 |
| H  | -2.62677000 | -0.85197200 | -3.39146600 |
| H  | -1.68329100 | -0.83041800 | -4.88778300 |
| H  | -1.27087100 | 0.29377900  | -3.55385000 |
| C  | 1.13075600  | 0.73201600  | -0.59101700 |
| C  | 2.27835600  | 2.92712800  | -1.81561000 |
| N  | 2.18086300  | 2.25967500  | -4.20133200 |
| Si | 3.59115600  | 4.31395000  | -1.53125700 |
| C  | 3.18923300  | 5.72129200  | -2.70702300 |
| H  | 2.18700900  | 6.12927000  | -2.50230200 |
| H  | 3.91743200  | 6.54024200  | -2.59243300 |
| H  | 3.21920000  | 5.39727900  | -3.75953200 |
| C  | 3.41438100  | 4.83153000  | 0.25120900  |
| H  | 3.64822200  | 3.99319700  | 0.92316100  |
| H  | 4.09880500  | 5.66579200  | 0.47296000  |
| H  | 2.38455900  | 5.15737700  | 0.45855200  |
| C  | 5.26655900  | 3.56779500  | -1.90952200 |
| H  | 5.32514900  | 3.20198400  | -2.94674600 |



|   |            |            |             |
|---|------------|------------|-------------|
| H | 6.06282000 | 4.31652700 | -1.77113700 |
| H | 5.46827800 | 2.72013200 | -1.23664500 |
| H | 1.23297400 | 3.19194400 | -1.47909100 |

Cartesian coordinates of the optimized geometry of Int-4 at PBE0-D3BJ/def2-SVP level of theory:

|    |             |             |             |
|----|-------------|-------------|-------------|
| Ga | -1.71768300 | 0.51427500  | 0.13970100  |
| Ga | 0.83632600  | -1.08297100 | 0.26091900  |
| P  | -0.35189900 | 1.10574200  | -1.71418500 |
| P  | 2.65891900  | 0.76834200  | -1.79284600 |
| O  | -0.78992700 | -0.78152400 | 1.01351500  |
| N  | -1.94520700 | 2.33429000  | 0.95454100  |
| N  | -3.58489800 | -0.04464400 | 0.54026900  |
| N  | 1.87534100  | -1.70366600 | 1.83670900  |
| N  | 1.16752100  | -2.75586200 | -0.76814200 |
| C  | -2.84515400 | 2.57612700  | 1.90195900  |
| C  | -3.84927500 | 1.66223300  | 2.25081600  |
| H  | -4.49320200 | 1.95855600  | 3.07690300  |
| C  | -4.24366000 | 0.50132300  | 1.56379300  |
| C  | -2.81773100 | 3.88465100  | 2.63922000  |
| H  | -3.75643100 | 4.05717600  | 3.17872500  |
| H  | -2.62513400 | 4.72649200  | 1.96043200  |
| H  | -1.99415500 | 3.87093300  | 3.37020800  |
| C  | -5.53371800 | -0.12420000 | 2.02124200  |
| H  | -5.34692500 | -1.10890700 | 2.46880900  |
| H  | -6.21248100 | -0.29572500 | 1.17464900  |
| H  | -6.03354000 | 0.51079600  | 2.76152900  |
| C  | -1.21298300 | 3.41776100  | 0.37161300  |
| C  | 0.01148800  | 3.85836900  | 0.90882500  |
| C  | 0.68898300  | 4.89943100  | 0.26556900  |
| H  | 1.64236600  | 5.24258400  | 0.67461300  |
| C  | 0.18295400  | 5.49252900  | -0.88298700 |
| H  | 0.73278300  | 6.29873500  | -1.37461800 |
| C  | -1.02860100 | 5.05256600  | -1.40304000 |
| H  | -1.42799100 | 5.52027900  | -2.30514800 |
| C  | -1.74537600 | 4.02143800  | -0.79274400 |
| C  | 0.63450100  | 3.22998500  | 2.13386600  |
| H  | -0.06038600 | 2.46443000  | 2.50613200  |
| C  | 0.86913900  | 4.24042400  | 3.25654800  |
| H  | 1.23638100  | 3.72459600  | 4.15746800  |
| H  | -0.04663300 | 4.78973500  | 3.52198200  |
| H  | 1.62878100  | 4.98586800  | 2.97239200  |
| C  | 1.93693800  | 2.52928300  | 1.76819600  |
| H  | 2.67272600  | 3.24054800  | 1.36075300  |
| H  | 1.77147400  | 1.75853200  | 1.00319100  |
| H  | 2.37711300  | 2.05617200  | 2.65306300  |
| C  | -3.09243800 | 3.61118100  | -1.35374400 |
| H  | -3.33141100 | 2.62104700  | -0.93709500 |
| C  | -4.18233300 | 4.57519800  | -0.88008100 |
| H  | -4.25721600 | 4.59558900  | 0.21691900  |
| H  | -5.16604100 | 4.28142300  | -1.27716100 |
| H  | -3.97057500 | 5.60115800  | -1.22152400 |
| C  | -3.08834400 | 3.48215300  | -2.87394100 |
| H  | -2.95212200 | 4.45570800  | -3.37012400 |
| H  | -4.04955400 | 3.07639200  | -3.22359700 |
| H  | -2.28377600 | 2.81190600  | -3.21190800 |
| C  | -4.16559100 | -1.19522700 | -0.07971800 |
| C  | -4.01886900 | -2.47261000 | 0.50509700  |
| C  | -4.70651100 | -3.54533100 | -0.07406900 |
| H  | -4.61128500 | -4.53803700 | 0.37281500  |
| C  | -5.49474000 | -3.37750200 | -1.20382700 |
| H  | -6.02609900 | -4.22879300 | -1.63578300 |
| C  | -5.58393600 | -2.12423800 | -1.80077400 |
| H  | -6.17877800 | -2.00630300 | -2.70739400 |
| C  | -4.92319700 | -1.01757700 | -1.26126800 |
| C  | -3.12907300 | -2.74007400 | 1.70642600  |

|   |             |             |             |
|---|-------------|-------------|-------------|
| H | -2.67952200 | -1.78606800 | 2.01471500  |
| C | -3.87867500 | -3.35351800 | 2.88981000  |
| H | -3.19414100 | -3.47726600 | 3.74374100  |
| H | -4.27966100 | -4.35023900 | 2.64521400  |
| H | -4.72288300 | -2.73691400 | 3.23168300  |
| C | -1.96631000 | -3.64697900 | 1.30696900  |
| H | -1.26864200 | -3.77034900 | 2.14869400  |
| H | -1.40082600 | -3.20507200 | 0.47899600  |
| H | -2.31762100 | -4.64812600 | 1.00668600  |
| C | -5.02469400 | 0.34369200  | -1.93107300 |
| H | -4.03127600 | 0.81458000  | -1.83379600 |
| C | -6.03693600 | 1.26131200  | -1.24087000 |
| H | -5.73335900 | 1.53070500  | -0.22084200 |
| H | -7.02745100 | 0.78108500  | -1.19410600 |
| H | -6.14789100 | 2.19866700  | -1.80723600 |
| C | -5.34391400 | 0.25998100  | -3.42111300 |
| H | -4.67084800 | -0.42865800 | -3.95130000 |
| H | -5.23977000 | 1.25296100  | -3.88249500 |
| H | -6.37988700 | -0.06937700 | -3.59863300 |
| C | 1.94878600  | -3.00523300 | 2.11119700  |
| C | 1.55747900  | -4.02772800 | 1.23182900  |
| H | 1.60728800  | -5.03987900 | 1.63122600  |
| C | 1.28334100  | -3.92358700 | -0.13641100 |
| C | 2.48849700  | -3.45107100 | 3.44293400  |
| H | 2.72793100  | -4.52062300 | 3.42544600  |
| H | 1.74277400  | -3.27499700 | 4.23086300  |
| H | 3.38390800  | -2.88220300 | 3.72658000  |
| C | 1.10262000  | -5.22026400 | -0.88015200 |
| H | 1.79969200  | -5.98820900 | -0.52126000 |
| H | 1.21142100  | -5.10398400 | -1.96437900 |
| H | 0.08381900  | -5.58657700 | -0.67485900 |
| C | 2.36537300  | -0.78451700 | 2.81256300  |
| C | 3.66641200  | -0.26333800 | 2.64141800  |
| C | 4.19426200  | 0.55455000  | 3.64283900  |
| H | 5.20412100  | 0.95418400  | 3.53360500  |
| C | 3.44303300  | 0.88673200  | 4.76593600  |
| H | 3.86784600  | 1.53259800  | 5.53800900  |
| C | 2.14235100  | 0.41368000  | 4.88980500  |
| H | 1.54839900  | 0.69815500  | 5.76201100  |
| C | 1.57547700  | -0.43116200 | 3.92810300  |
| C | 4.48053800  | -0.59744400 | 1.40617800  |
| H | 3.76257700  | -0.80680200 | 0.59647200  |
| C | 5.31303300  | -1.86377300 | 1.61336200  |
| H | 5.99174400  | -1.74818700 | 2.47366600  |
| H | 5.92689100  | -2.07473900 | 0.72462700  |
| H | 4.68072100  | -2.74444900 | 1.79439300  |
| C | 5.35051100  | 0.56098300  | 0.93077600  |
| H | 6.18043300  | 0.77170800  | 1.62372400  |
| H | 4.75764500  | 1.47898400  | 0.80686900  |
| H | 5.79321800  | 0.31620600  | -0.04616500 |
| C | 0.15293900  | -0.92687600 | 4.12746400  |
| H | -0.07469600 | -1.63057800 | 3.31367200  |
| C | -0.03762900 | -1.63310400 | 5.47149400  |
| H | 0.69803400  | -2.43296200 | 5.64280300  |
| H | -1.04193000 | -2.08204200 | 5.52398200  |
| H | 0.04853200  | -0.92842900 | 6.31388900  |
| C | -0.85364200 | 0.21433400  | 3.99490300  |
| H | -1.87899400 | -0.15809500 | 4.14364500  |
| H | -0.80775900 | 0.64025300  | 2.98685800  |
| H | -0.66887400 | 1.00736100  | 4.73807800  |
| C | 1.36210800  | -2.69409400 | -2.18255900 |
| C | 2.68436900  | -2.75193200 | -2.68608800 |
| C | 2.86665300  | -2.71516400 | -4.07118300 |
| H | 3.87842200  | -2.76526600 | -4.47771400 |
| C | 1.78890800  | -2.59488800 | -4.93897000 |
| H | 1.95429800  | -2.56354800 | -6.01851300 |
| C | 0.50215600  | -2.49109800 | -4.42667000 |
| H | -0.33958800 | -2.37227800 | -5.11111700 |

|    |             |             |             |
|----|-------------|-------------|-------------|
| C  | 0.26328800  | -2.53397300 | -3.05033200 |
| C  | 3.89974600  | -2.84918000 | -1.77668600 |
| H  | 3.59391700  | -2.46370200 | -0.79126000 |
| C  | 4.36766800  | -4.29359000 | -1.58439600 |
| H  | 5.25242700  | -4.32467200 | -0.92916700 |
| H  | 4.64763500  | -4.74134500 | -2.55166200 |
| H  | 3.59789100  | -4.92904200 | -1.13165200 |
| C  | 5.07139800  | -1.99955500 | -2.26691900 |
| H  | 5.86914600  | -1.98635500 | -1.50856900 |
| H  | 4.76030000  | -0.96381700 | -2.45915300 |
| H  | 5.51668000  | -2.40990000 | -3.18675400 |
| C  | -1.15628300 | -2.44501900 | -2.53082600 |
| H  | -1.10733400 | -2.05809700 | -1.49898600 |
| C  | -1.82557400 | -3.81846100 | -2.47383900 |
| H  | -1.27870900 | -4.51457500 | -1.82673600 |
| H  | -1.87613500 | -4.26390200 | -3.48056800 |
| H  | -2.84961100 | -3.72848800 | -2.08299800 |
| C  | -2.02266200 | -1.48602900 | -3.33800400 |
| H  | -2.97194100 | -1.32755900 | -2.81139500 |
| H  | -2.26733000 | -1.89187500 | -4.33258900 |
| H  | -1.53378900 | -0.50968700 | -3.47928800 |
| C  | 1.05130900  | 0.38855400  | -1.07436500 |
| C  | 2.71912000  | 2.44313500  | -1.80955000 |
| H  | 1.84698100  | 2.99666900  | -1.42901700 |
| Si | 4.19999000  | 3.43546600  | -2.35397300 |
| C  | 5.57294400  | 2.29888600  | -2.95748400 |
| H  | 5.91098500  | 1.62756300  | -2.15288100 |
| H  | 5.22713900  | 1.67169200  | -3.79410900 |
| H  | 6.44187200  | 2.88145600  | -3.30284400 |
| C  | 4.81087300  | 4.45901600  | -0.89011800 |
| H  | 5.13135600  | 3.80768200  | -0.06202800 |
| H  | 5.66321800  | 5.09750600  | -1.17324400 |
| H  | 4.00782100  | 5.11256100  | -0.51374000 |
| C  | 3.66530700  | 4.60596900  | -3.73123800 |
| H  | 3.31180600  | 4.04082500  | -4.60757400 |
| H  | 2.83654700  | 5.24718800  | -3.39081700 |
| H  | 4.49427400  | 5.25774200  | -4.05110600 |

Cartesian coordinates of the optimized geometry of Int-5 at PBE0-D3BJ/def2-SVP level of theory:

|    |             |             |             |
|----|-------------|-------------|-------------|
| Ga | -1.71646100 | -0.11076600 | 0.29074600  |
| Ga | 1.22223600  | -0.97961700 | -0.01009600 |
| P  | -0.49163000 | 1.30737600  | -1.16164500 |
| P  | 2.21259800  | 2.20283600  | -0.20970200 |
| O  | -0.48183700 | -1.42933600 | 0.44407400  |
| N  | -2.45858900 | 0.88846700  | 1.83298700  |
| N  | -3.34721000 | -1.16006500 | -0.04694300 |
| N  | 2.26954500  | -2.15203800 | 1.17578000  |
| N  | 2.07010100  | -1.68284400 | -1.68897300 |
| C  | -3.45853000 | 0.38138600  | 2.55032200  |
| C  | -4.16881700 | -0.77564300 | 2.19439800  |
| H  | -4.91440100 | -1.10968300 | 2.91471700  |
| C  | -4.19269100 | -1.42124100 | 0.95070500  |
| C  | -3.94106300 | 1.08170100  | 3.79171600  |
| H  | -4.08365600 | 0.34259700  | 4.59315800  |
| H  | -4.92070200 | 1.54317000  | 3.59908200  |
| H  | -3.25467100 | 1.86446800  | 4.13132000  |
| C  | -5.26807900 | -2.45279900 | 0.75150300  |
| H  | -4.82529600 | -3.45749000 | 0.71823100  |
| H  | -5.78775700 | -2.31050200 | -0.20564800 |
| H  | -5.99735500 | -2.41881200 | 1.56897800  |
| C  | -2.05144500 | 2.24267600  | 2.06579000  |
| C  | -0.82770800 | 2.50822300  | 2.71376400  |
| C  | -0.44299800 | 3.84128900  | 2.87628200  |
| H  | 0.50725500  | 4.06942900  | 3.35920100  |
| C  | -1.24616400 | 4.88469600  | 2.43232600  |

|   |             |             |             |
|---|-------------|-------------|-------------|
| H | -0.92181600 | 5.91939600  | 2.56572200  |
| C | -2.45207900 | 4.60651100  | 1.80758600  |
| H | -3.07247000 | 5.42900100  | 1.44384200  |
| C | -2.87309600 | 3.29123600  | 1.59978600  |
| C | 0.03000800  | 1.39197800  | 3.27630700  |
| H | 0.00442900  | 0.55631500  | 2.55447800  |
| C | -0.52797700 | 0.88004300  | 4.60634500  |
| H | 0.13488200  | 0.10606600  | 5.01998800  |
| H | -1.52614600 | 0.43876400  | 4.50164500  |
| H | -0.59206700 | 1.70444400  | 5.33470400  |
| C | 1.48655100  | 1.78866200  | 3.46434800  |
| H | 1.60532000  | 2.52804100  | 4.27252400  |
| H | 1.91562500  | 2.20516500  | 2.54152300  |
| H | 2.07166800  | 0.90579200  | 3.74734400  |
| C | -4.17166600 | 3.05833100  | 0.84758400  |
| H | -4.33797100 | 1.97289700  | 0.77486300  |
| C | -5.37250200 | 3.66385100  | 1.57683500  |
| H | -5.44553600 | 3.31669000  | 2.61740100  |
| H | -6.31002900 | 3.40066500  | 1.06193500  |
| H | -5.30769800 | 4.76306200  | 1.60302700  |
| C | -4.09030900 | 3.60575700  | -0.57781700 |
| H | -3.94565400 | 4.69738900  | -0.57357400 |
| H | -5.02313900 | 3.39678000  | -1.12380700 |
| H | -3.24053300 | 3.17216100  | -1.12058300 |
| C | -3.55173300 | -1.81319600 | -1.29971800 |
| C | -3.08366500 | -3.12815900 | -1.51335500 |
| C | -3.40229200 | -3.74642400 | -2.72809200 |
| H | -3.05562200 | -4.76683500 | -2.90998200 |
| C | -4.15151900 | -3.09614000 | -3.69999500 |
| H | -4.39770900 | -3.60474100 | -4.63509500 |
| C | -4.56847300 | -1.78577400 | -3.48871700 |
| H | -5.12937000 | -1.26918100 | -4.26929600 |
| C | -4.26462600 | -1.11594900 | -2.30103700 |
| C | -2.25411900 | -3.88996800 | -0.49381300 |
| H | -2.13421100 | -3.24556600 | 0.38838300  |
| C | -2.90066400 | -5.21110500 | -0.07284700 |
| H | -2.30840000 | -5.68300800 | 0.72693100  |
| H | -2.94412500 | -5.92433300 | -0.91143400 |
| H | -3.92765000 | -5.08839200 | 0.30119400  |
| C | -0.84648000 | -4.15557900 | -1.02425900 |
| H | -0.23310900 | -4.64560100 | -0.25268400 |
| H | -0.34945000 | -3.21573800 | -1.28708900 |
| H | -0.86373500 | -4.81233900 | -1.90922500 |
| C | -4.69893200 | 0.32400200  | -2.08892400 |
| H | -3.94025000 | 0.79174100  | -1.44014000 |
| C | -6.03879200 | 0.41548600  | -1.35494000 |
| H | -5.98607100 | -0.00563100 | -0.34180200 |
| H | -6.82487600 | -0.12149100 | -1.90984200 |
| H | -6.35296900 | 1.46610100  | -1.25730200 |
| C | -4.74451400 | 1.13023700  | -3.38328100 |
| H | -3.80686300 | 1.03985900  | -3.94992300 |
| H | -4.90033000 | 2.19473600  | -3.15632600 |
| H | -5.57260100 | 0.81395300  | -4.03712400 |
| C | 2.72066400  | -3.32975400 | 0.73709400  |
| C | 2.75832900  | -3.71727100 | -0.60828100 |
| H | 3.13220400  | -4.72222000 | -0.80034200 |
| C | 2.58171600  | -2.90779900 | -1.74048100 |
| C | 3.26066700  | -4.32427600 | 1.72794700  |
| H | 3.76581800  | -5.14957100 | 1.21326400  |
| H | 2.44480200  | -4.73740300 | 2.33568700  |
| H | 3.96119000  | -3.85139200 | 2.42938900  |
| C | 3.04422100  | -3.50784100 | -3.04199100 |
| H | 4.08746000  | -3.84145400 | -2.95826200 |
| H | 2.95381400  | -2.81476200 | -3.88530900 |
| H | 2.43937500  | -4.40346400 | -3.25140000 |
| C | 2.38833400  | -1.87277200 | 2.57115800  |
| C | 3.49779100  | -1.11214000 | 3.00204200  |
| C | 3.69125600  | -0.94034400 | 4.37488000  |

|    |             |             |             |
|----|-------------|-------------|-------------|
| H  | 4.54892700  | -0.36621900 | 4.72940700  |
| C  | 2.79534300  | -1.47209100 | 5.29691500  |
| H  | 2.96056300  | -1.32594700 | 6.36694700  |
| C  | 1.67876300  | -2.16903800 | 4.85253300  |
| H  | 0.96626600  | -2.56365600 | 5.58133700  |
| C  | 1.44712100  | -2.38733300 | 3.48962200  |
| C  | 4.46609300  | -0.50998600 | 1.99834800  |
| H  | 3.88334700  | -0.28415300 | 1.08963100  |
| C  | 5.56011100  | -1.50510100 | 1.60375300  |
| H  | 6.11131200  | -1.84991300 | 2.49336500  |
| H  | 6.28401800  | -1.03288300 | 0.92230800  |
| H  | 5.15330100  | -2.38700400 | 1.09030500  |
| C  | 5.08207700  | 0.80302500  | 2.47059900  |
| H  | 5.78858900  | 0.65203200  | 3.30217400  |
| H  | 4.31191800  | 1.51672100  | 2.79486900  |
| H  | 5.64352400  | 1.26836500  | 1.64749800  |
| C  | 0.21084600  | -3.16162300 | 3.06220700  |
| H  | 0.24300900  | -3.26573600 | 1.96832800  |
| C  | 0.13139300  | -4.55039000 | 3.69973500  |
| H  | 1.03358500  | -5.15634800 | 3.53094400  |
| H  | -0.72563300 | -5.10576100 | 3.28725100  |
| H  | -0.01618700 | -4.48565500 | 4.78954000  |
| C  | -1.06470200 | -2.38452700 | 3.38091400  |
| H  | -1.94576500 | -2.92519000 | 3.00255700  |
| H  | -1.05208800 | -1.40208200 | 2.89806600  |
| H  | -1.19363900 | -2.24612500 | 4.46644000  |
| C  | 2.28183000  | -0.77226200 | -2.77223500 |
| C  | 3.54096500  | -0.14191100 | -2.89914500 |
| C  | 3.71368100  | 0.79932200  | -3.91853400 |
| H  | 4.67992300  | 1.29723700  | -4.02681500 |
| C  | 2.67977900  | 1.11892800  | -4.78726000 |
| H  | 2.83164200  | 1.86271000  | -5.57319400 |
| C  | 1.44904700  | 0.48731400  | -4.65288700 |
| H  | 0.64111400  | 0.74427500  | -5.33825300 |
| C  | 1.22309700  | -0.46407000 | -3.65437100 |
| C  | 4.72409100  | -0.46131200 | -1.99963200 |
| H  | 4.35626900  | -1.07222300 | -1.16125800 |
| C  | 5.78189600  | -1.27655200 | -2.74897600 |
| H  | 6.59123900  | -1.58070600 | -2.06650800 |
| H  | 6.23225100  | -0.67696900 | -3.55621800 |
| H  | 5.36441300  | -2.18155000 | -3.20822500 |
| C  | 5.37135900  | 0.79123800  | -1.41111700 |
| H  | 6.19150500  | 0.51230000  | -0.73220000 |
| H  | 4.64561200  | 1.39590100  | -0.84917900 |
| H  | 5.80579500  | 1.42975700  | -2.19589000 |
| C  | -0.11980900 | -1.16493300 | -3.56172000 |
| H  | -0.35305000 | -1.29134900 | -2.48917900 |
| C  | -0.07835900 | -2.56261700 | -4.18301100 |
| H  | 0.60915800  | -3.23252900 | -3.65590700 |
| H  | 0.23579200  | -2.50721000 | -5.23768500 |
| H  | -1.07895400 | -3.01800000 | -4.14398400 |
| C  | -1.25856000 | -0.37422200 | -4.19109500 |
| H  | -2.21332000 | -0.86106600 | -3.95596500 |
| H  | -1.17207700 | -0.34179800 | -5.28906100 |
| H  | -1.29235000 | 0.65684000  | -3.81043200 |
| C  | 1.08406300  | 0.96322300  | -0.37667900 |
| C  | 1.33915300  | 3.54192400  | -1.18122900 |
| Si | 2.32919600  | 5.15352800  | -1.30688400 |
| C  | 1.34604100  | 6.37663400  | -2.34031600 |
| H  | 0.33943800  | 6.49532300  | -1.91012900 |
| H  | 1.83044400  | 7.36541100  | -2.37162700 |
| H  | 1.23349000  | 6.01908900  | -3.37613300 |
| C  | 2.56258000  | 5.79786600  | 0.44234700  |
| H  | 3.15815600  | 5.09110700  | 1.04183600  |
| H  | 3.06735700  | 6.77649900  | 0.46019400  |
| H  | 1.57701400  | 5.90144500  | 0.92337300  |
| C  | 3.98060800  | 4.76032800  | -2.12084600 |
| H  | 3.82682000  | 4.29103300  | -3.10598500 |

|   |             |            |             |
|---|-------------|------------|-------------|
| H | 4.58304300  | 5.67107500 | -2.26677800 |
| H | 4.56573300  | 4.05925800 | -1.50507700 |
| N | 0.00357100  | 3.83893600 | -0.62680900 |
| N | -0.85724900 | 2.95879500 | -0.63146500 |
| H | 1.16745600  | 3.06754100 | -2.17580100 |

Cartesian coordinates of the optimized geometry of Int-6 at PBE0-D3BJ/def2-SVP level of theory:

|    |             |             |             |
|----|-------------|-------------|-------------|
| Ga | -2.00295700 | -0.32984300 | -0.08413000 |
| Ga | 2.16859900  | -0.25538300 | 0.58717000  |
| P  | 0.11735000  | -1.17821900 | -0.33005900 |
| P  | 1.14527500  | -0.67960000 | 2.59762200  |
| O  | -1.48410000 | -0.76423700 | 1.75081300  |
| C  | -0.21067500 | -0.88736000 | 1.47282400  |
| N  | -3.60027400 | -1.26618300 | -0.63695100 |
| N  | -2.74725400 | 1.44798300  | -0.01413800 |
| N  | 3.68767200  | -1.17955300 | -0.22612300 |
| N  | 2.74003300  | 1.54129300  | 0.09157400  |
| C  | -4.77307400 | -0.65976100 | -0.78015700 |
| C  | -4.97373600 | 0.71957400  | -0.59347600 |
| H  | -5.99240800 | 1.07391100  | -0.74222800 |
| C  | -4.03375200 | 1.69832900  | -0.22873100 |
| C  | -5.96720000 | -1.48568700 | -1.16358400 |
| H  | -6.86992600 | -0.86897700 | -1.23918400 |
| H  | -6.14600200 | -2.27967800 | -0.42182900 |
| H  | -5.80333800 | -1.98543600 | -2.13121900 |
| C  | -4.52648700 | 3.10822900  | -0.07166900 |
| H  | -5.60185000 | 3.17809400  | -0.27082700 |
| H  | -3.99912100 | 3.78750200  | -0.75974800 |
| H  | -4.33480300 | 3.47551400  | 0.94865300  |
| C  | 4.52187800  | -0.59844900 | -1.07323500 |
| C  | 4.50593900  | 0.77887300  | -1.36678300 |
| H  | 5.24549600  | 1.11981600  | -2.08973100 |
| C  | 3.70288000  | 1.77747800  | -0.79217200 |
| C  | 5.56084700  | -1.43929100 | -1.76011500 |
| H  | 5.08976300  | -2.26091400 | -2.32189800 |
| H  | 6.23585000  | -1.90372800 | -1.02397200 |
| H  | 6.16369300  | -0.84093900 | -2.45298100 |
| C  | 3.97477100  | 3.19867000  | -1.19953900 |
| H  | 3.06537400  | 3.67565900  | -1.59707600 |
| H  | 4.75917600  | 3.24912300  | -1.96343300 |
| H  | 4.29676200  | 3.79863600  | -0.33358200 |
| C  | 1.99682300  | 2.63068300  | 0.68573500  |
| H  | 1.36905400  | 3.16085900  | -0.05220700 |
| H  | 1.34110500  | 2.21885400  | 1.46781700  |
| H  | 2.65572300  | 3.37477900  | 1.16348800  |
| C  | 3.76400600  | -2.59883600 | 0.04533000  |
| H  | 3.03484500  | -2.84570100 | 0.83121500  |
| H  | 3.51747900  | -3.20455400 | -0.84361000 |
| H  | 4.76206400  | -2.90258000 | 0.40274300  |
| C  | -1.83675900 | 2.49463500  | 0.40006900  |
| H  | -0.81938300 | 2.08222400  | 0.43348500  |
| H  | -1.83192100 | 3.34734500  | -0.29907700 |
| H  | -2.07452500 | 2.87407000  | 1.40805200  |
| C  | -3.46803000 | -2.69627900 | -0.83569000 |
| H  | -2.40743900 | -2.97026900 | -0.73673500 |
| H  | -4.03788800 | -3.27065700 | -0.08607400 |
| H  | -3.80509500 | -3.00939400 | -1.83763000 |

Cartesian coordinates of the optimized geometry of Int-7 at PBE0-D3BJ/def2-SVP level of theory:

|    |             |             |             |
|----|-------------|-------------|-------------|
| Ga | -1.98639700 | -0.83509800 | 0.00073800  |
| Ga | 1.98638700  | -0.83508800 | -0.00051100 |
| P  | -1.62303800 | -3.07807400 | 0.00116300  |

|   |             |             |             |
|---|-------------|-------------|-------------|
| P | 1.62304400  | -3.07806400 | -0.00029400 |
| O | -0.00000700 | -0.95216500 | 0.00025800  |
| N | -2.44925600 | 0.37132600  | 1.45030000  |
| N | -2.44930300 | 0.36942700  | -1.45049200 |
| N | 2.44946400  | 0.37083100  | -1.45041100 |
| N | 2.44906200  | 0.36995200  | 1.45038100  |
| C | -2.86768100 | 1.61690400  | 1.26409500  |
| C | -3.06630800 | 2.19655800  | -0.00128800 |
| H | -3.41693500 | 3.22747400  | -0.00196100 |
| C | -2.86761400 | 1.61525600  | -1.26593200 |
| C | -3.14788400 | 2.47126700  | 2.46769400  |
| H | -3.92949700 | 2.01670700  | 3.09652200  |
| H | -3.47669300 | 3.47537200  | 2.17627500  |
| H | -2.24955900 | 2.56575800  | 3.09772600  |
| C | -3.14764500 | 2.46811300  | -2.47064300 |
| H | -3.92875900 | 2.01249500  | -3.09931400 |
| H | -2.24904600 | 2.56223900  | -3.10035000 |
| H | -3.47697600 | 3.47243000  | -2.18054500 |
| C | 2.86781800  | 1.61650100  | -1.26456000 |
| C | 3.06621500  | 2.19660100  | 0.00064500  |
| H | 3.41680500  | 3.22753000  | 0.00101900  |
| C | 2.86740700  | 1.61570600  | 1.26546600  |
| C | 3.14818900  | 2.47046600  | -2.46840200 |
| H | 3.93003500  | 2.01579800  | -3.09686200 |
| H | 3.47677200  | 3.47472800  | -2.17726800 |
| H | 2.25001000  | 2.56458800  | -3.09869800 |
| C | 3.14730900  | 2.46896000  | 2.46992600  |
| H | 3.92830600  | 2.01352200  | 3.09887100  |
| H | 2.24861700  | 2.56333800  | 3.09946500  |
| H | 3.47672900  | 3.47316300  | 2.17953500  |
| C | -0.00000100 | -2.35598200 | 0.00037800  |
| C | 2.23554200  | -0.15877400 | 2.78211100  |
| H | 3.14259600  | -0.10259100 | 3.40668700  |
| H | 1.42415000  | 0.37028700  | 3.31163600  |
| H | 1.94939800  | -1.21803400 | 2.69639500  |
| C | 2.23704800  | -0.15724400 | -2.78259000 |
| H | 1.95096600  | -1.21658000 | -2.69766900 |
| H | 1.42601800  | 0.37196500  | -3.31253300 |
| H | 3.14458300  | -0.10063600 | -3.40642700 |
| C | -2.23590700 | -0.15970700 | -2.78208100 |
| H | -3.14306200 | -0.10383700 | -3.40654300 |
| H | -1.42465600 | 0.36926800  | -3.31190500 |
| H | -1.94964500 | -1.21891000 | -2.69605900 |
| C | -2.23648900 | -0.15625700 | 2.78261500  |
| H | -1.95027700 | -1.21558300 | 2.69801000  |
| H | -1.42543500 | 0.37326500  | 3.31220900  |
| H | -3.14390800 | -0.09956400 | 3.40661400  |

Cartesian coordinates of the optimized geometry of TS-1 at PBE0-D3BJ/def2-SVP level of theory:

|    |             |             |             |
|----|-------------|-------------|-------------|
| Ga | 1.86700700  | 0.29731700  | 0.52500800  |
| Ga | -1.76848000 | -0.25750000 | -0.74705700 |
| P  | -0.10230400 | -0.76149200 | 0.73535900  |
| P  | -0.62850900 | -0.13455000 | -2.80715400 |
| O  | 1.77305600  | 0.17100700  | -1.45292400 |
| C  | 0.57537300  | -0.16604100 | -1.62763000 |
| N  | 3.39608000  | -0.88778800 | 0.88971400  |
| N  | 2.79890800  | 1.95781700  | 0.88779000  |
| N  | -2.85045800 | -1.92988200 | -0.72944000 |
| N  | -3.33119600 | 0.95493100  | -0.74438600 |
| C  | 4.47888300  | -0.47055100 | 1.53054800  |
| C  | 4.67700800  | 0.86191400  | 1.94382100  |
| H  | 5.58384200  | 1.04579500  | 2.51845600  |
| C  | 3.94115100  | 1.99258900  | 1.58786700  |
| C  | 5.61179500  | -1.41396200 | 1.82863100  |
| H  | 5.89877200  | -1.32098500 | 2.88577400  |

|   |             |             |             |
|---|-------------|-------------|-------------|
| H | 6.49007300  | -1.12569100 | 1.23189900  |
| H | 5.36754700  | -2.45806400 | 1.60633300  |
| C | 4.48030600  | 3.32864600  | 2.01255200  |
| H | 5.43177700  | 3.21598700  | 2.54465700  |
| H | 3.76000700  | 3.83864400  | 2.66908600  |
| H | 4.62677200  | 3.98963200  | 1.14699200  |
| C | 3.31606900  | -2.23458300 | 0.40571100  |
| C | 2.71350000  | -3.22268700 | 1.21246800  |
| C | 2.68830300  | -4.53528200 | 0.73420900  |
| H | 2.22670600  | -5.31494300 | 1.34300200  |
| C | 3.23653600  | -4.86380400 | -0.49987200 |
| H | 3.21199800  | -5.89794500 | -0.85188500 |
| C | 3.79582000  | -3.87112600 | -1.29364800 |
| H | 4.20446200  | -4.13032400 | -2.27309700 |
| C | 3.83819100  | -2.53997000 | -0.86832500 |
| C | 2.15020600  | -2.90983100 | 2.58614100  |
| H | 1.97494700  | -1.82347200 | 2.62763300  |
| C | 3.14492700  | -3.26938400 | 3.69213700  |
| H | 4.09683100  | -2.73097800 | 3.59004600  |
| H | 3.37006100  | -4.34813400 | 3.67856600  |
| H | 2.72517200  | -3.02606000 | 4.68087900  |
| C | 0.80694400  | -3.58728500 | 2.83000300  |
| H | 0.38171700  | -3.24355500 | 3.78576500  |
| H | 0.89947000  | -4.68298900 | 2.89258300  |
| H | 0.09478300  | -3.34185700 | 2.03061900  |
| C | 4.46298400  | -1.49210800 | -1.77176500 |
| H | 4.26167700  | -0.50725900 | -1.32661700 |
| C | 5.98007500  | -1.66705500 | -1.86416400 |
| H | 6.42555100  | -0.86756100 | -2.47704300 |
| H | 6.23829100  | -2.63032600 | -2.33265200 |
| H | 6.45958600  | -1.64422400 | -0.87555900 |
| C | 3.83864800  | -1.49455300 | -3.16638200 |
| H | 4.24083100  | -0.66112300 | -3.76317100 |
| H | 2.74900900  | -1.37624800 | -3.11528000 |
| H | 4.06392700  | -2.42628900 | -3.70905700 |
| C | 2.25852000  | 3.19033700  | 0.40295800  |
| C | 1.36457400  | 3.92697000  | 1.20461500  |
| C | 0.89837100  | 5.15199000  | 0.71844800  |
| H | 0.19530900  | 5.73264600  | 1.31951000  |
| C | 1.32786800  | 5.64774200  | -0.50660800 |
| H | 0.96784700  | 6.61686000  | -0.86077000 |
| C | 2.20199500  | 4.90197100  | -1.28912900 |
| H | 2.52025100  | 5.28868800  | -2.26029000 |
| C | 2.66914300  | 3.65543700  | -0.86479500 |
| C | 0.91464000  | 3.42784200  | 2.56324500  |
| H | 1.57030600  | 2.58787600  | 2.84048500  |
| C | 1.04961900  | 4.49400800  | 3.64997100  |
| H | 2.06396800  | 4.92113400  | 3.68873400  |
| H | 0.82443300  | 4.06177400  | 4.63703600  |
| H | 0.34571900  | 5.32592100  | 3.49195900  |
| C | -0.51294300 | 2.89195700  | 2.49852500  |
| H | -0.83227800 | 2.52543700  | 3.48630800  |
| H | -0.59640900 | 2.05651200  | 1.78761000  |
| H | -1.21680600 | 3.67477700  | 2.18052400  |
| C | 3.61311900  | 2.86252800  | -1.75094700 |
| H | 3.75507500  | 1.87840100  | -1.28274600 |
| C | 4.98583500  | 3.53002200  | -1.84771000 |
| H | 4.91351000  | 4.52840900  | -2.30829000 |
| H | 5.66543500  | 2.92461300  | -2.46785500 |
| H | 5.45500900  | 3.65157700  | -0.85994000 |
| C | 3.02059800  | 2.61724800  | -3.13734600 |
| H | 2.86616500  | 3.55901000  | -3.68776000 |
| H | 2.06045000  | 2.08880400  | -3.06876300 |
| H | 3.70297400  | 1.99274100  | -3.73467700 |
| C | -3.99630700 | -1.93303600 | -1.39894900 |
| C | -4.65027500 | -0.76042000 | -1.82798900 |
| H | -5.55714700 | -0.91487000 | -2.41001400 |
| C | -4.41694300 | 0.55854900  | -1.41281900 |



|   |             |             |             |
|---|-------------|-------------|-------------|
| C | -4.67647100 | -3.23972600 | -1.69672500 |
| H | -4.82608200 | -3.82201900 | -0.77629600 |
| H | -4.04358400 | -3.85605000 | -2.35059800 |
| H | -5.64527800 | -3.07841100 | -2.18343500 |
| C | -5.49843000 | 1.56196800  | -1.69765900 |
| H | -5.98117100 | 1.87499200  | -0.75981600 |
| H | -6.26234600 | 1.13700300  | -2.35904000 |
| H | -5.08557400 | 2.47292500  | -2.15109000 |
| C | -2.38587600 | -3.15533000 | -0.15715700 |
| C | -2.72034800 | -3.43506200 | 1.18637900  |
| C | -2.37831400 | -4.68423800 | 1.70898600  |
| H | -2.63891100 | -4.92395200 | 2.74094600  |
| C | -1.68758500 | -5.62036900 | 0.94692400  |
| H | -1.42749700 | -6.59137300 | 1.37537900  |
| C | -1.29960300 | -5.29917700 | -0.34595100 |
| H | -0.71697500 | -6.01619900 | -0.92946500 |
| C | -1.63363700 | -4.06869200 | -0.92161700 |
| C | -3.41833400 | -2.40198500 | 2.05247400  |
| H | -3.08997300 | -1.41736200 | 1.68218800  |
| C | -4.94104100 | -2.46140600 | 1.92143200  |
| H | -5.41519400 | -1.72213400 | 2.58662000  |
| H | -5.32072600 | -3.45751300 | 2.20110700  |
| H | -5.27642200 | -2.24299400 | 0.89793200  |
| C | -2.99731100 | -2.49489400 | 3.51548200  |
| H | -1.90300100 | -2.45769600 | 3.61330600  |
| H | -3.35724400 | -3.41994300 | 3.99255500  |
| H | -3.41841000 | -1.65627000 | 4.08737400  |
| C | -1.12275700 | -3.74360200 | -2.30975500 |
| H | -1.52964600 | -2.76224600 | -2.59732300 |
| C | -1.54986500 | -4.76386000 | -3.36399900 |
| H | -1.19677600 | -4.45151400 | -4.35899000 |
| H | -2.64318200 | -4.87981700 | -3.41848600 |
| H | -1.12338000 | -5.75931200 | -3.16155900 |
| C | 0.39892600  | -3.60841400 | -2.27667900 |
| H | 0.71894500  | -2.91924700 | -1.48151400 |
| H | 0.77631400  | -3.22303700 | -3.23642100 |
| H | 0.87762400  | -4.58118400 | -2.08574200 |
| C | -3.29895400 | 2.27596900  | -0.20368500 |
| C | -3.85763800 | 2.50697400  | 1.07122000  |
| C | -3.85210100 | 3.80909000  | 1.57789400  |
| H | -4.28422500 | 4.00035900  | 2.56339200  |
| C | -3.29799700 | 4.86031000  | 0.85643700  |
| H | -3.29769100 | 5.87140200  | 1.27105500  |
| C | -2.74287200 | 4.61681800  | -0.39367200 |
| H | -2.30555500 | 5.44198900  | -0.96097900 |
| C | -2.74369400 | 3.33476900  | -0.95228700 |
| C | -4.45277300 | 1.38723600  | 1.90165300  |
| H | -4.45085300 | 0.47813000  | 1.28283100  |
| C | -5.90072300 | 1.66971200  | 2.30070600  |
| H | -6.33200200 | 0.80050600  | 2.82138400  |
| H | -6.53175800 | 1.88405700  | 1.42486300  |
| H | -5.97547300 | 2.53183500  | 2.98216800  |
| C | -3.58783300 | 1.10825500  | 3.12962600  |
| H | -2.58182800 | 0.77075500  | 2.84023300  |
| H | -4.04605800 | 0.32776900  | 3.75496100  |
| H | -3.47724000 | 2.01117500  | 3.75080200  |
| C | -2.17230000 | 3.12971200  | -2.33991000 |
| H | -2.30035400 | 2.06910100  | -2.60108500 |
| C | -2.90458100 | 3.95918900  | -3.39506800 |
| H | -2.77654300 | 5.03940200  | -3.22031900 |
| H | -3.98542700 | 3.75248200  | -3.41058800 |
| H | -2.50588200 | 3.73602100  | -4.39675200 |
| C | -0.67761000 | 3.42700200  | -2.36445900 |
| H | -0.48317800 | 4.49460200  | -2.18659600 |
| H | -0.24423000 | 3.15487400  | -3.33823400 |
| H | -0.13962400 | 2.85933100  | -1.59184900 |

Cartesian coordinates of the optimized geometry of TS-2 at PBE0-D3BJ/def2-SVP level of theory:

|    |             |             |             |
|----|-------------|-------------|-------------|
| Ga | 2.61071400  | 0.14123200  | -0.12198200 |
| Ga | -2.52804800 | -0.05790400 | -0.15659300 |
| P  | 1.22321900  | -0.50977300 | -1.84323800 |
| P  | -1.29313800 | 1.38803100  | -1.20735200 |
| O  | 0.88366700  | 0.95756100  | 0.34412300  |
| N  | 3.78157300  | 1.71376900  | -0.32002700 |
| N  | 3.54436100  | -0.61085700 | 1.41259200  |
| N  | -3.10009600 | -1.91210800 | -0.26426500 |
| N  | -3.90556000 | 0.50617700  | 1.10820800  |
| C  | 4.76326000  | 2.01644100  | 0.50866900  |
| C  | 5.08349500  | 1.24366400  | 1.64629300  |
| H  | 5.89555300  | 1.62842600  | 2.26205000  |
| C  | 4.54141600  | 0.02303900  | 2.04717200  |
| C  | 5.61041100  | 3.23503800  | 0.27605900  |
| H  | 6.66886800  | 2.99593800  | 0.44831900  |
| H  | 5.32972100  | 4.01802600  | 0.99697800  |
| H  | 5.48327500  | 3.64024800  | -0.73480700 |
| C  | 5.15166900  | -0.63687900 | 3.25176800  |
| H  | 5.66628800  | -1.56645300 | 2.96482600  |
| H  | 4.37522000  | -0.92630400 | 3.97407500  |
| H  | 5.87251900  | 0.02888500  | 3.74029000  |
| C  | 3.46338400  | 2.51367600  | -1.45963900 |
| C  | 3.85015400  | 2.03658000  | -2.73093200 |
| C  | 3.47934600  | 2.77564300  | -3.85466900 |
| H  | 3.76839800  | 2.42511800  | -4.84714000 |
| C  | 2.73407100  | 3.94341200  | -3.72993800 |
| H  | 2.44279200  | 4.50399400  | -4.62128200 |
| C  | 2.34971400  | 4.38809600  | -2.47231800 |
| H  | 1.75209300  | 5.29834600  | -2.38234900 |
| C  | 2.69977200  | 3.68872500  | -1.31239200 |
| C  | 4.68822900  | 0.78019000  | -2.87337800 |
| H  | 4.49362600  | 0.15652500  | -1.98576000 |
| C  | 6.18008200  | 1.11780500  | -2.86459000 |
| H  | 6.78937300  | 0.20177300  | -2.92476700 |
| H  | 6.46964200  | 1.65682300  | -1.95045100 |
| H  | 6.44049300  | 1.75632700  | -3.72399900 |
| C  | 4.31061500  | -0.06080400 | -4.08724300 |
| H  | 4.57506400  | 0.43619000  | -5.03406300 |
| H  | 3.23073100  | -0.27202000 | -4.09175500 |
| H  | 4.84964500  | -1.02071000 | -4.06444800 |
| C  | 2.25589300  | 4.22481100  | 0.03660500  |
| H  | 2.59889300  | 3.51922400  | 0.80831100  |
| C  | 2.88341200  | 5.59268400  | 0.32009400  |
| H  | 3.97818100  | 5.58315200  | 0.21724300  |
| H  | 2.63672500  | 5.92601800  | 1.34049500  |
| H  | 2.49686100  | 6.35389300  | -0.37611500 |
| C  | 0.73451600  | 4.30575600  | 0.14745900  |
| H  | 0.26324000  | 3.32611900  | -0.01013500 |
| H  | 0.31484400  | 5.00921200  | -0.58912700 |
| H  | 0.44540500  | 4.66387400  | 1.14828500  |
| C  | 3.22024900  | -1.94265000 | 1.81051700  |
| C  | 3.99617000  | -3.00938800 | 1.30288100  |
| C  | 3.70401700  | -4.30541100 | 1.73201000  |
| H  | 4.29187800  | -5.14298300 | 1.35089000  |
| C  | 2.67213400  | -4.54774700 | 2.63398700  |
| H  | 2.46099000  | -5.56788700 | 2.96297400  |
| C  | 1.90105600  | -3.49093400 | 3.10012000  |
| H  | 1.08412700  | -3.68732100 | 3.79914200  |
| C  | 2.15090500  | -2.17415300 | 2.69590500  |
| C  | 5.08785000  | -2.76643200 | 0.27666900  |
| H  | 5.38264800  | -1.70848900 | 0.34824100  |
| C  | 6.34183200  | -3.60085200 | 0.52224400  |
| H  | 6.16043600  | -4.67537900 | 0.36368100  |
| H  | 6.72238000  | -3.47306600 | 1.54749900  |
| H  | 7.13899200  | -3.30253400 | -0.17569000 |

|   |             |             |             |
|---|-------------|-------------|-------------|
| C | 4.54207300  | -2.98781200 | -1.13642500 |
| H | 3.66430300  | -2.35398900 | -1.33462500 |
| H | 4.22870700  | -4.03499200 | -1.27412400 |
| H | 5.30907900  | -2.75706900 | -1.89265500 |
| C | 1.27715700  | -1.05185700 | 3.22249800  |
| H | 1.64964000  | -0.10711700 | 2.80000100  |
| C | 1.34782500  | -0.94519600 | 4.74595500  |
| H | 0.93949900  | -1.84352800 | 5.23577700  |
| H | 0.76258600  | -0.08120500 | 5.09780600  |
| H | 2.38244100  | -0.81603900 | 5.09867800  |
| C | -0.16493000 | -1.21648200 | 2.74628700  |
| H | -0.21675600 | -1.12544900 | 1.65236800  |
| H | -0.80250400 | -0.43231800 | 3.17463100  |
| H | -0.58393000 | -2.19155600 | 3.03760600  |
| C | -4.03909800 | -2.43109800 | 0.53387900  |
| C | -4.67779200 | -1.72455300 | 1.56354500  |
| H | -5.36592000 | -2.30333400 | 2.17744500  |
| C | -4.67054600 | -0.33912500 | 1.79335500  |
| C | -4.52105100 | -3.83163200 | 0.28082500  |
| H | -5.25988500 | -3.81594000 | -0.53563200 |
| H | -5.01014900 | -4.23867300 | 1.17450200  |
| H | -3.71228600 | -4.49891300 | -0.03911800 |
| C | -5.59790500 | 0.19946200  | 2.84320100  |
| H | -6.20750300 | 1.02120600  | 2.44059300  |
| H | -5.01983000 | 0.62328100  | 3.67747600  |
| H | -6.25507100 | -0.58700800 | 3.23208600  |
| C | -2.71524900 | -2.65194200 | -1.43456400 |
| C | -3.53411900 | -2.56581800 | -2.57822500 |
| C | -3.19378400 | -3.33161500 | -3.69687200 |
| H | -3.81603700 | -3.27552600 | -4.59326000 |
| C | -2.07161300 | -4.14734000 | -3.68993000 |
| H | -1.81917300 | -4.74149800 | -4.57130200 |
| C | -1.24972500 | -4.18248400 | -2.56923400 |
| H | -0.34851600 | -4.79524800 | -2.58885400 |
| C | -1.54139700 | -3.43409500 | -1.42585400 |
| C | -4.72264200 | -1.62627100 | -2.66469100 |
| H | -4.89677800 | -1.19878100 | -1.66494700 |
| C | -6.01145000 | -2.33520400 | -3.07788000 |
| H | -5.94549000 | -2.73343100 | -4.10233100 |
| H | -6.85977600 | -1.63353200 | -3.05312600 |
| H | -6.25033800 | -3.17734600 | -2.41051400 |
| C | -4.39903900 | -0.46857600 | -3.61168700 |
| H | -3.50057600 | 0.07765800  | -3.28234000 |
| H | -5.24122900 | 0.23844900  | -3.66290300 |
| H | -4.21040800 | -0.83857700 | -4.63171900 |
| C | -0.60409000 | -3.45371300 | -0.23263100 |
| H | -0.51861900 | -2.40662100 | 0.10339100  |
| C | -1.13253900 | -4.28821300 | 0.93611100  |
| H | -1.36231300 | -5.31592000 | 0.61055900  |
| H | -2.03500500 | -3.86037500 | 1.39259000  |
| H | -0.36495600 | -4.35194900 | 1.72124000  |
| C | 0.80538300  | -3.90645600 | -0.58924800 |
| H | 0.84686600  | -4.98621900 | -0.80830200 |
| H | 1.47694200  | -3.72045600 | 0.25895400  |
| H | 1.19363900  | -3.34720800 | -1.45188300 |
| C | -4.04316200 | 1.91878600  | 1.28450800  |
| C | -4.77010700 | 2.64227900  | 0.31427500  |
| C | -4.93566600 | 4.01585500  | 0.50332700  |
| H | -5.50059400 | 4.59509700  | -0.22810600 |
| C | -4.37354600 | 4.66436900  | 1.59745900  |
| H | -4.51462800 | 5.73987200  | 1.72746000  |
| C | -3.60188300 | 3.94782600  | 2.50122900  |
| H | -3.12048700 | 4.47006700  | 3.33130500  |
| C | -3.40872800 | 2.57045700  | 2.35847000  |
| C | -5.33481400 | 1.95519100  | -0.91654300 |
| H | -4.61540500 | 1.16633500  | -1.19905000 |
| C | -6.67142400 | 1.26709200  | -0.63756500 |
| H | -7.05206500 | 0.77776800  | -1.54817400 |

|   |             |            |             |
|---|-------------|------------|-------------|
| H | -7.42493400 | 1.99983200 | -0.30693200 |
| H | -6.58465100 | 0.49459500 | 0.13950100  |
| C | -5.43878200 | 2.88521600 | -2.11951900 |
| H | -4.48008100 | 3.38664400 | -2.31717000 |
| H | -6.21389000 | 3.65523500 | -1.98076100 |
| H | -5.71223500 | 2.31199600 | -3.01716600 |
| C | -2.46668200 | 1.85421600 | 3.30539000  |
| H | -2.56414200 | 0.77319900 | 3.11930400  |
| C | -2.79932500 | 2.10087100 | 4.77631800  |
| H | -3.84753200 | 1.86069400 | 5.01364400  |
| H | -2.63057600 | 3.15158700 | 5.05932000  |
| H | -2.15538100 | 1.48349400 | 5.42192800  |
| C | -1.02076000 | 2.25002800 | 2.99334900  |
| H | -0.32424900 | 1.76252200 | 3.69426600  |
| H | -0.88815800 | 3.33845700 | 3.09763700  |
| H | -0.72838300 | 1.96907300 | 1.96999500  |
| C | 0.31954400  | 0.56276400 | -0.78252100 |

Cartesian coordinates of the optimized geometry of TS-3 at PBE0-D3BJ/def2-SVP level of theory:

|    |             |             |             |
|----|-------------|-------------|-------------|
| Ga | 1.86479300  | -0.00685000 | -0.22300900 |
| Ga | -1.86482300 | 0.00687200  | -0.22300900 |
| P  | 1.49325600  | -0.69835800 | -2.37578800 |
| P  | -1.49338400 | 0.69855400  | -2.37574500 |
| O  | -0.00001600 | 0.00011500  | 0.01351000  |
| N  | 2.78400000  | 1.75251600  | -0.14988000 |
| N  | 2.79003700  | -0.77069900 | 1.32331400  |
| N  | -2.78389300 | -1.75257700 | -0.14996600 |
| N  | -2.79014500 | 0.77062300  | 1.32329900  |
| C  | 3.56355000  | 2.12269600  | 0.85530900  |
| C  | 3.82419400  | 1.31665100  | 1.97992400  |
| H  | 4.44193200  | 1.77465000  | 2.75142900  |
| C  | 3.54531800  | -0.04087300 | 2.15309500  |
| C  | 4.29262700  | 3.43885100  | 0.82196900  |
| H  | 5.37009500  | 3.25776000  | 0.69319100  |
| H  | 4.16572100  | 3.95259800  | 1.78576500  |
| H  | 3.95206000  | 4.09179300  | 0.01138100  |
| C  | 4.16329100  | -0.70795300 | 3.35074600  |
| H  | 4.64910900  | -1.65386000 | 3.07355600  |
| H  | 3.39106700  | -0.95906100 | 4.09188700  |
| H  | 4.89903600  | -0.04886900 | 3.82578800  |
| C  | 2.82009700  | 2.47964000  | -1.38432800 |
| C  | 3.88683800  | 2.24680300  | -2.27739500 |
| C  | 3.90231100  | 2.94802000  | -3.48649600 |
| H  | 4.72080900  | 2.78052900  | -4.19095300 |
| C  | 2.88931600  | 3.83837500  | -3.81261800 |
| H  | 2.91335200  | 4.37232200  | -4.76550100 |
| C  | 1.83330400  | 4.03662300  | -2.93020900 |
| H  | 1.03149100  | 4.72339900  | -3.20288400 |
| C  | 1.77154900  | 3.36579300  | -1.70648700 |
| C  | 5.00434000  | 1.25872800  | -1.99096000 |
| H  | 4.79091800  | 0.77276600  | -1.02659600 |
| C  | 6.36187700  | 1.95349800  | -1.86829400 |
| H  | 7.14237800  | 1.23136200  | -1.58075200 |
| H  | 6.34888400  | 2.75826400  | -1.11981300 |
| H  | 6.66315600  | 2.40334300  | -2.82757200 |
| C  | 5.06611600  | 0.16116600  | -3.05337100 |
| H  | 5.33127900  | 0.57461200  | -4.03899200 |
| H  | 4.09810600  | -0.34964800 | -3.15809400 |
| H  | 5.83340200  | -0.58437400 | -2.79221900 |
| C  | 0.62608500  | 3.61710500  | -0.74441100 |
| H  | 0.37679600  | 2.64716400  | -0.28199100 |
| C  | 1.03064000  | 4.58992000  | 0.36532700  |
| H  | 1.84028200  | 4.19891800  | 0.99313000  |
| H  | 0.17029600  | 4.79098400  | 1.02028500  |
| H  | 1.36536400  | 5.54801700  | -0.06446200 |

|   |             |             |             |
|---|-------------|-------------|-------------|
| C | -0.63635800 | 4.12760200  | -1.42627600 |
| H | -0.93569000 | 3.47159800  | -2.25641100 |
| H | -0.51164900 | 5.15593600  | -1.80344900 |
| H | -1.45882000 | 4.14594800  | -0.69846000 |
| C | 2.71154900  | -2.18241400 | 1.52692100  |
| C | 3.53141300  | -3.02126200 | 0.73937500  |
| C | 3.50385800  | -4.39585900 | 0.98921800  |
| H | 4.13486300  | -5.06085900 | 0.39732500  |
| C | 2.67844000  | -4.93301600 | 1.97114700  |
| H | 2.67158700  | -6.01056800 | 2.15087200  |
| C | 1.84907500  | -4.09740000 | 2.70849300  |
| H | 1.18673400  | -4.52672100 | 3.46403200  |
| C | 1.84406500  | -2.71426600 | 2.50297000  |
| C | 4.44113500  | -2.44965100 | -0.33337500 |
| H | 3.95463300  | -1.53784100 | -0.71448300 |
| C | 5.79612600  | -2.03217500 | 0.24055200  |
| H | 6.31361100  | -2.89351000 | 0.69284600  |
| H | 5.69416900  | -1.25377900 | 1.01010200  |
| H | 6.44285100  | -1.62770600 | -0.55387800 |
| C | 4.61265900  | -3.37983500 | -1.52920900 |
| H | 3.63878000  | -3.69604300 | -1.93006500 |
| H | 5.19430900  | -4.28042700 | -1.27625800 |
| H | 5.15376000  | -2.86029300 | -2.33326200 |
| C | 0.90434400  | -1.84174800 | 3.31354700  |
| H | 1.18551500  | -0.79521000 | 3.13000500  |
| C | 0.99734400  | -2.10400500 | 4.81657300  |
| H | 0.60463000  | -3.09874800 | 5.07922400  |
| H | 0.39842600  | -1.36318900 | 5.36925400  |
| H | 2.03133600  | -2.05180800 | 5.19014700  |
| C | -0.53516600 | -2.00547700 | 2.83341900  |
| H | -0.62785200 | -1.71467900 | 1.77909200  |
| H | -1.21767100 | -1.37675900 | 3.42430400  |
| H | -0.87407200 | -3.04742700 | 2.93655300  |
| C | -3.56350000 | -2.12279700 | 0.85516600  |
| C | -3.82426400 | -1.31677700 | 1.97977300  |
| H | -4.44201900 | -1.77483100 | 2.75123300  |
| C | -3.54542700 | 0.04074300  | 2.15303000  |
| C | -4.29242100 | -3.43904600 | 0.82186600  |
| H | -5.37004300 | -3.25808500 | 0.69422500  |
| H | -4.16450500 | -3.95321200 | 1.78531100  |
| H | -3.95246700 | -4.09157700 | 0.01069100  |
| C | -4.16342900 | 0.70775400  | 3.35069900  |
| H | -4.64947400 | 1.65354300  | 3.07349900  |
| H | -3.39119100 | 0.95906500  | 4.09175100  |
| H | -4.89899400 | 0.04854400  | 3.82584400  |
| C | -2.81990600 | -2.47962200 | -1.38446600 |
| C | -3.88659900 | -2.24672000 | -2.27757300 |
| C | -3.90202200 | -2.94786200 | -3.48671800 |
| H | -4.72049300 | -2.78033000 | -4.19119700 |
| C | -2.88901200 | -3.83819500 | -3.81285300 |
| H | -2.91300700 | -4.37208500 | -4.76576800 |
| C | -1.83302900 | -4.03648100 | -2.93041800 |
| H | -1.03119500 | -4.72322500 | -3.20311000 |
| C | -1.77132600 | -3.36572700 | -1.70665100 |
| C | -5.00413700 | -1.25870100 | -1.99109700 |
| H | -4.79059600 | -0.77258800 | -1.02683600 |
| C | -6.36157900 | -1.95359800 | -1.86808700 |
| H | -6.66303700 | -2.40349100 | -2.82728800 |
| H | -7.14208200 | -1.23153500 | -1.58036800 |
| H | -6.34831400 | -2.75834500 | -1.11959500 |
| C | -5.06619600 | -0.16128300 | -3.05363600 |
| H | -4.09826600 | 0.34964900  | -3.15853300 |
| H | -5.83354800 | 0.58418500  | -2.79247200 |
| H | -5.33143800 | -0.57487200 | -4.03917500 |
| C | -0.62587900 | -3.61706400 | -0.74456400 |
| H | -0.37661100 | -2.64713700 | -0.28210300 |
| C | -1.03045500 | -4.58991900 | 0.36512700  |
| H | -1.36507700 | -5.54803400 | -0.06470200 |

|   |             |             |             |
|---|-------------|-------------|-------------|
| H | -1.84018300 | -4.19897600 | 0.99285100  |
| H | -0.17015700 | -4.79092800 | 1.02016300  |
| C | 0.63658600  | -4.12752200 | -1.42641900 |
| H | 0.51187200  | -5.15582100 | -1.80368900 |
| H | 1.45900700  | -4.14595700 | -0.69856100 |
| H | 0.93597300  | -3.47144900 | -2.25647900 |
| C | -2.71170500 | 2.18234400  | 1.52687900  |
| C | -3.53156600 | 3.02113300  | 0.73926700  |
| C | -3.50402100 | 4.39574800  | 0.98900300  |
| H | -4.13503400 | 5.06069500  | 0.39705600  |
| C | -2.67861000 | 4.93298600  | 1.97089200  |
| H | -2.67175800 | 6.01055200  | 2.15053200  |
| C | -1.84925900 | 4.09742600  | 2.70831800  |
| H | -1.18693000 | 4.52681000  | 3.46383100  |
| C | -1.84424500 | 2.71427400  | 2.50290800  |
| C | -4.44128900 | 2.44946900  | -0.33345300 |
| H | -3.95496800 | 1.53744500  | -0.71427300 |
| C | -5.79644100 | 2.03244600  | 0.24041900  |
| H | -6.44315400 | 1.62788900  | -0.55397600 |
| H | -6.31380500 | 2.89401100  | 0.69241200  |
| H | -5.69473300 | 1.25424700  | 1.01020300  |
| C | -4.61241300 | 3.37940800  | -1.52953500 |
| H | -3.63838900 | 3.69514600  | -1.93041100 |
| H | -5.19374300 | 4.28028100  | -1.27685000 |
| H | -5.15365400 | 2.85985900  | -2.33348800 |
| C | -0.90457700 | 1.84182000  | 3.31361800  |
| H | -1.18572600 | 0.79526700  | 3.13012200  |
| C | -0.99775200 | 2.10419500  | 4.81661800  |
| H | -2.03179900 | 2.05210300  | 5.19006200  |
| H | -0.60501300 | 3.09893700  | 5.07923500  |
| H | -0.39894700 | 1.36339100  | 5.36943800  |
| C | 0.53498800  | 2.00553200  | 2.83364400  |
| H | 1.21744000  | 1.37691800  | 3.42470000  |
| H | 0.87384400  | 3.04750600  | 2.93668700  |
| H | 0.62780200  | 1.71459700  | 1.77936600  |
| C | -0.00005000 | 0.00011500  | -1.90362900 |

Cartesian coordinates of the optimized geometry of TS-4 at PBE0-D3BJ/def2-SVP level of theory:

|    |             |             |             |
|----|-------------|-------------|-------------|
| Ga | -1.79575200 | 0.45744000  | 0.18867900  |
| Ga | 0.81587900  | -1.09292900 | 0.26205500  |
| P  | -0.49900900 | 1.16846200  | -1.61487900 |
| P  | 2.58292500  | 0.87722800  | -0.60133700 |
| O  | -0.83828500 | -0.88539000 | 0.96520200  |
| N  | -2.19079700 | 2.10199200  | 1.27053500  |
| N  | -3.65199800 | -0.22348900 | 0.31411700  |
| N  | 1.70139900  | -2.00192400 | 1.80230300  |
| N  | 1.24480500  | -2.51896000 | -1.05329000 |
| N  | 2.94820100  | 2.06618600  | -3.39977400 |
| C  | -3.22347800 | 2.17882200  | 2.09852800  |
| C  | -4.18935500 | 1.16603400  | 2.22467900  |
| H  | -4.93517300 | 1.31836400  | 3.00355200  |
| C  | -4.44273800 | 0.11379100  | 1.33573600  |
| C  | -3.47211600 | 3.42249600  | 2.90994100  |
| H  | -3.80245400 | 3.14577100  | 3.92098600  |
| H  | -4.28806500 | 4.00025800  | 2.44982000  |
| H  | -2.59252900 | 4.07199200  | 2.97546200  |
| C  | -5.73240200 | -0.63349600 | 1.54125100  |
| H  | -5.53637200 | -1.68624100 | 1.78182000  |
| H  | -6.33625500 | -0.63589600 | 0.62281200  |
| H  | -6.31645600 | -0.18649500 | 2.35383100  |
| C  | -1.43412800 | 3.27957600  | 0.98582600  |
| C  | -0.19838300 | 3.48943500  | 1.63172700  |
| C  | 0.50360500  | 4.66303600  | 1.34683300  |
| H  | 1.45464300  | 4.84920400  | 1.84641500  |
| C  | 0.01814500  | 5.59524600  | 0.43590400  |

|   |             |             |             |
|---|-------------|-------------|-------------|
| H | 0.58349500  | 6.50819900  | 0.23142800  |
| C | -1.18394500 | 5.35710600  | -0.21628200 |
| H | -1.55593600 | 6.08159300  | -0.94519000 |
| C | -1.92908100 | 4.20285900  | 0.04108200  |
| C | 0.34846000  | 2.49029000  | 2.63207600  |
| H | 0.04798800  | 1.48725400  | 2.28380600  |
| C | -0.24323500 | 2.69712200  | 4.02813200  |
| H | 0.22456200  | 2.00075400  | 4.73954100  |
| H | -1.32521200 | 2.51958400  | 4.05708300  |
| H | -0.05382600 | 3.72461600  | 4.37903400  |
| C | 1.86765800  | 2.50290800  | 2.71681500  |
| H | 2.25012300  | 3.43723400  | 3.15862400  |
| H | 2.31804400  | 2.36641800  | 1.72276500  |
| H | 2.20821000  | 1.68051300  | 3.35682000  |
| C | -3.22364700 | 3.98108200  | -0.71879200 |
| H | -3.63746800 | 3.01267400  | -0.40038800 |
| C | -4.26379400 | 5.05688400  | -0.40349600 |
| H | -4.45806400 | 5.13840000  | 0.67547800  |
| H | -5.21836300 | 4.83208900  | -0.90478800 |
| H | -3.93074300 | 6.04698900  | -0.75330400 |
| C | -2.97357400 | 3.90418200  | -2.22493200 |
| H | -2.59023200 | 4.86053500  | -2.61464100 |
| H | -3.90886300 | 3.68191300  | -2.76112300 |
| H | -2.23447400 | 3.12626400  | -2.46834400 |
| C | -4.12535400 | -1.22566300 | -0.58509100 |
| C | -3.98488100 | -2.59374400 | -0.26886300 |
| C | -4.57352200 | -3.53102100 | -1.12519800 |
| H | -4.48265200 | -4.59477100 | -0.89127700 |
| C | -5.26513800 | -3.13733800 | -2.26300500 |
| H | -5.72506700 | -3.88558100 | -2.91291000 |
| C | -5.34681700 | -1.78706500 | -2.58930800 |
| H | -5.85937500 | -1.48921700 | -3.50518300 |
| C | -4.77208400 | -0.81045600 | -1.77192400 |
| C | -3.20469000 | -3.07989400 | 0.93977100  |
| H | -2.85179200 | -2.19573600 | 1.48939800  |
| C | -4.03299600 | -3.95730600 | 1.87896500  |
| H | -3.43719100 | -4.22683900 | 2.76528600  |
| H | -4.33887300 | -4.89730300 | 1.39226200  |
| H | -4.94778100 | -3.46056500 | 2.23436300  |
| C | -1.95370300 | -3.83424300 | 0.49550200  |
| H | -1.34423300 | -4.11588500 | 1.36728000  |
| H | -1.33078100 | -3.20347700 | -0.14829700 |
| H | -2.20974900 | -4.75587500 | -0.05265100 |
| C | -4.83249700 | 0.66032300  | -2.15312400 |
| H | -3.87189600 | 1.10168500  | -1.83678400 |
| C | -5.94516600 | 1.41403600  | -1.42025600 |
| H | -5.79124300 | 1.43706300  | -0.33345100 |
| H | -6.92582700 | 0.95363300  | -1.62189500 |
| H | -5.98891500 | 2.45871700  | -1.76605900 |
| C | -4.96114100 | 0.88524300  | -3.65672100 |
| H | -4.19836200 | 0.33152800  | -4.22182300 |
| H | -4.83931400 | 1.95368000  | -3.88706800 |
| H | -5.95273800 | 0.58647000  | -4.03221600 |
| C | 1.79707000  | -3.32796400 | 1.80958100  |
| C | 1.55696800  | -4.14955100 | 0.69666200  |
| H | 1.63523900  | -5.22067900 | 0.88257900  |
| C | 1.40723400  | -3.77936600 | -0.64258400 |
| C | 2.18258200  | -4.06439200 | 3.06655600  |
| H | 2.84910400  | -4.90219700 | 2.82341500  |
| H | 1.27522200  | -4.49021700 | 3.52119200  |
| H | 2.66312700  | -3.42103300 | 3.81159300  |
| C | 1.43500400  | -4.91750100 | -1.63120600 |
| H | 2.24209800  | -5.62278300 | -1.39431500 |
| H | 1.54010900  | -4.58147400 | -2.66808500 |
| H | 0.48885200  | -5.47321300 | -1.53889000 |
| C | 2.01422400  | -1.28752700 | 2.99916200  |
| C | 3.31862600  | -0.76553500 | 3.14453900  |
| C | 3.66266500  | -0.15901800 | 4.35498700  |

|    |             |             |             |
|----|-------------|-------------|-------------|
| H  | 4.67092800  | 0.23714300  | 4.48977100  |
| C  | 2.73590200  | -0.03881000 | 5.38544500  |
| H  | 3.01929100  | 0.44304600  | 6.32415900  |
| C  | 1.44531300  | -0.52279600 | 5.21104200  |
| H  | 0.71898800  | -0.42150000 | 6.02150000  |
| C  | 1.05464400  | -1.16149100 | 4.02813300  |
| C  | 4.33887700  | -0.89749000 | 2.03007700  |
| H  | 3.77209200  | -0.96995000 | 1.08878900  |
| C  | 5.15975000  | -2.18092000 | 2.16244800  |
| H  | 5.71199100  | -2.19921200 | 3.11594200  |
| H  | 5.89307100  | -2.25583500 | 1.34384600  |
| H  | 4.52635400  | -3.07762200 | 2.12159900  |
| C  | 5.24858200  | 0.31990900  | 1.90743900  |
| H  | 5.93798000  | 0.41328500  | 2.76145600  |
| H  | 4.66418500  | 1.24875800  | 1.83243600  |
| H  | 5.86766000  | 0.23422000  | 1.00138600  |
| C  | -0.34736400 | -1.73853700 | 3.93049300  |
| H  | -0.45289800 | -2.18942500 | 2.93437000  |
| C  | -0.59514900 | -2.80450900 | 5.00064400  |
| H  | 0.17860200  | -3.58482200 | 5.00776000  |
| H  | -1.56885200 | -3.29167800 | 4.83283400  |
| H  | -0.62040400 | -2.36197700 | 6.00955400  |
| C  | -1.42063600 | -0.65689100 | 4.02086300  |
| H  | -2.41990400 | -1.10484600 | 3.90666200  |
| H  | -1.29990900 | 0.07581800  | 3.21605100  |
| H  | -1.39676300 | -0.13544100 | 4.99136000  |
| C  | 1.55631300  | -2.20143600 | -2.41457500 |
| C  | 2.92007100  | -2.07986400 | -2.77481500 |
| C  | 3.23310200  | -1.83264400 | -4.11323100 |
| H  | 4.27951800  | -1.73995300 | -4.41056400 |
| C  | 2.23711900  | -1.68634100 | -5.07031200 |
| H  | 2.50186600  | -1.48507000 | -6.11086900 |
| C  | 0.90410900  | -1.77457700 | -4.69413700 |
| H  | 0.12604900  | -1.64254800 | -5.44734300 |
| C  | 0.53384500  | -2.03009900 | -3.36933000 |
| C  | 4.04821300  | -2.22547700 | -1.76582800 |
| H  | 3.61163800  | -2.05724800 | -0.76958300 |
| C  | 4.66832900  | -3.62414000 | -1.77744500 |
| H  | 5.49015900  | -3.68487600 | -1.04641700 |
| H  | 5.08189900  | -3.85910200 | -2.77150700 |
| H  | 3.94197300  | -4.40493200 | -1.52400300 |
| C  | 5.14580500  | -1.18366500 | -1.96783100 |
| H  | 5.84874500  | -1.20258800 | -1.12027300 |
| H  | 4.72296400  | -0.17255300 | -2.03595900 |
| H  | 5.73377600  | -1.37648600 | -2.87895700 |
| C  | -0.93450500 | -2.17552900 | -3.01978300 |
| H  | -1.04910600 | -1.88447000 | -1.96271600 |
| C  | -1.41776000 | -3.61918600 | -3.16797700 |
| H  | -0.89787000 | -4.30394300 | -2.48940400 |
| H  | -1.25971500 | -3.97687400 | -4.19842000 |
| H  | -2.49268400 | -3.67962900 | -2.94271100 |
| C  | -1.83214500 | -1.26009700 | -3.84288400 |
| H  | -2.84831000 | -1.28862600 | -3.42929600 |
| H  | -1.90047500 | -1.58807300 | -4.89268400 |
| H  | -1.47410700 | -0.22076000 | -3.81684900 |
| C  | 0.95880500  | 0.73281900  | -0.81290900 |
| C  | 2.86560600  | 2.68598200  | -2.24308800 |
| N  | 3.08005700  | 1.50045600  | -4.36697200 |
| Si | 4.35826800  | 3.72691100  | -1.70789600 |
| C  | 4.69847300  | 5.02263800  | -3.02815500 |
| H  | 3.83815400  | 5.69927900  | -3.14854800 |
| H  | 5.57703600  | 5.63253100  | -2.76222700 |
| H  | 4.90016600  | 4.55397900  | -4.00465100 |
| C  | 3.89853400  | 4.52973200  | -0.08462200 |
| H  | 3.70530300  | 3.77032100  | 0.68671400  |
| H  | 4.71414900  | 5.18359100  | 0.26233400  |
| H  | 2.98843200  | 5.13793300  | -0.19504800 |
| C  | 5.83989600  | 2.59012800  | -1.53500100 |



|   |            |            |             |
|---|------------|------------|-------------|
| H | 6.05627100 | 2.05874300 | -2.47510300 |
| H | 6.73755200 | 3.16774000 | -1.26244100 |
| H | 5.66330300 | 1.83868400 | -0.75112800 |
| H | 1.83394700 | 3.01178300 | -2.02760300 |

Cartesian coordinates of the optimized geometry of TS-5 at PBE0-D3BJ/def2-SVP level of theory:

|    |             |             |             |
|----|-------------|-------------|-------------|
| Ga | -1.75019600 | 0.26414500  | 0.29879300  |
| Ga | 0.88109500  | -1.14283500 | 0.07232500  |
| P  | -0.25503800 | 1.61835900  | -0.92148500 |
| P  | 2.77957300  | 1.39002400  | -0.61774500 |
| O  | -0.83217400 | -1.26030400 | 0.67144000  |
| N  | -2.21195600 | 1.57449100  | 1.76474900  |
| N  | -3.60771600 | -0.44376100 | 0.19591000  |
| N  | 1.79264000  | -2.39964200 | 1.30541800  |
| N  | 1.41054200  | -2.16297000 | -1.56779800 |
| N  | 1.97936600  | 3.01837700  | -2.70467900 |
| C  | -3.24477000 | 1.39935200  | 2.57618400  |
| C  | -4.17811500 | 0.36210300  | 2.41452400  |
| H  | -4.92678600 | 0.27217100  | 3.20033900  |
| C  | -4.40114900 | -0.41637000 | 1.27008300  |
| C  | -3.52442800 | 2.37377700  | 3.68865000  |
| H  | -3.87185200 | 1.83155500  | 4.57922800  |
| H  | -4.33474200 | 3.05443200  | 3.38581700  |
| H  | -2.65134000 | 2.98354000  | 3.94648800  |
| C  | -5.66634700 | -1.23169600 | 1.26558000  |
| H  | -5.43351100 | -2.30404300 | 1.24487100  |
| H  | -6.26458500 | -1.02977700 | 0.36621700  |
| H  | -6.27039800 | -1.01807500 | 2.15477600  |
| C  | -1.50865600 | 2.81772400  | 1.77772200  |
| C  | -0.24746700 | 2.90900300  | 2.40493300  |
| C  | 0.41785600  | 4.13671600  | 2.37877100  |
| H  | 1.39041900  | 4.22387300  | 2.86427200  |
| C  | -0.13079800 | 5.24644200  | 1.74434000  |
| H  | 0.40626700  | 6.19856200  | 1.74119500  |
| C  | -1.36022400 | 5.13480100  | 1.11027600  |
| H  | -1.78200200 | 6.00078400  | 0.59386700  |
| C  | -2.06565900 | 3.92798800  | 1.10779100  |
| C  | 0.37516200  | 1.71652600  | 3.09939400  |
| H  | 0.09961300  | 0.82381700  | 2.51176400  |
| C  | -0.17422100 | 1.53229100  | 4.51527200  |
| H  | 0.33291600  | 0.68916000  | 5.00697500  |
| H  | -1.25060300 | 1.32001600  | 4.52176000  |
| H  | 0.00163000  | 2.43820800  | 5.11785500  |
| C  | 1.89503900  | 1.77994200  | 3.14046300  |
| H  | 2.25598500  | 2.57716400  | 3.81050100  |
| H  | 2.31651400  | 1.94298800  | 2.13728300  |
| H  | 2.29105800  | 0.83339000  | 3.52658400  |
| C  | -3.36612300 | 3.84676400  | 0.33126300  |
| H  | -3.75126300 | 2.82051300  | 0.42432200  |
| C  | -4.43046500 | 4.79475500  | 0.88372900  |
| H  | -4.61727100 | 4.62336100  | 1.95370200  |
| H  | -5.38323100 | 4.66275900  | 0.34732500  |
| H  | -4.12770600 | 5.84752100  | 0.76699600  |
| C  | -3.12204500 | 4.11596800  | -1.15421900 |
| H  | -2.76292000 | 5.14430900  | -1.31764700 |
| H  | -4.05318900 | 3.99711400  | -1.72830100 |
| H  | -2.36378000 | 3.43299100  | -1.56557000 |
| C  | -4.05412900 | -1.19755500 | -0.93262300 |
| C  | -3.87285600 | -2.59717200 | -0.98027500 |
| C  | -4.42988900 | -3.29752500 | -2.05662800 |
| H  | -4.30569400 | -4.38230600 | -2.10342700 |
| C  | -5.12730800 | -2.64551100 | -3.06392800 |
| H  | -5.55840300 | -3.21380800 | -3.89154700 |
| C  | -5.25405900 | -1.26050300 | -3.02872100 |
| H  | -5.77621600 | -0.75179800 | -3.84018500 |

|   |             |             |             |
|---|-------------|-------------|-------------|
| C | -4.71899100 | -0.51250700 | -1.97695600 |
| C | -3.08331700 | -3.36642400 | 0.06399900  |
| H | -2.74210400 | -2.65070200 | 0.82496900  |
| C | -3.89395800 | -4.47512700 | 0.73666400  |
| H | -3.29186500 | -4.95474300 | 1.52445800  |
| H | -4.18078400 | -5.26161200 | 0.02015300  |
| H | -4.81893300 | -4.10836200 | 1.20554300  |
| C | -1.81957800 | -3.95688400 | -0.55795800 |
| H | -1.20510000 | -4.44631400 | 0.21233100  |
| H | -1.20718500 | -3.16689700 | -1.00644400 |
| H | -2.05983600 | -4.70678900 | -1.32996600 |
| C | -4.84734500 | 1.00261700  | -1.96008000 |
| H | -3.90392900 | 1.38962200  | -1.53873400 |
| C | -5.98289000 | 1.48752300  | -1.05507600 |
| H | -5.81462600 | 1.23638500  | 0.00020800  |
| H | -6.94421000 | 1.04855800  | -1.36712100 |
| H | -6.07952100 | 2.58274700  | -1.11889300 |
| C | -5.00848000 | 1.60530100  | -3.35274800 |
| H | -4.23603900 | 1.24861000  | -4.04886800 |
| H | -4.93216900 | 2.70109700  | -3.29926400 |
| H | -5.99405400 | 1.37325500  | -3.78647600 |
| C | 1.92772400  | -3.68134400 | 0.97232700  |
| C | 1.70428800  | -4.19516300 | -0.31499700 |
| H | 1.79102300  | -5.27675000 | -0.41218000 |
| C | 1.55600800  | -3.48598500 | -1.51341600 |
| C | 2.34946300  | -4.67962800 | 2.01610900  |
| H | 2.73325000  | -5.59256100 | 1.54561600  |
| H | 1.48695800  | -4.95170400 | 2.64111600  |
| H | 3.11181600  | -4.26780700 | 2.69005500  |
| C | 1.55391200  | -4.31315000 | -2.77247100 |
| H | 2.27837100  | -5.13537400 | -2.71164000 |
| H | 1.75163400  | -3.71652600 | -3.67013200 |
| H | 0.55613500  | -4.76895900 | -2.87511300 |
| C | 2.09612900  | -2.00729600 | 2.64258000  |
| C | 3.36646200  | -1.44451600 | 2.89828200  |
| C | 3.70955800  | -1.14866700 | 4.21952700  |
| H | 4.69181300  | -0.72586500 | 4.43790600  |
| C | 2.80888800  | -1.36256000 | 5.25835000  |
| H | 3.09070700  | -1.12064400 | 6.28587500  |
| C | 1.54337900  | -1.86490100 | 4.98204500  |
| H | 0.83307600  | -2.01170800 | 5.79971200  |
| C | 1.15678400  | -2.20157800 | 3.67931900  |
| C | 4.33929600  | -1.18316700 | 1.76334400  |
| H | 3.73213300  | -0.96027700 | 0.87054000  |
| C | 5.18010100  | -2.42082800 | 1.44442200  |
| H | 5.74318800  | -2.74944200 | 2.33277500  |
| H | 5.90627100  | -2.19916800 | 0.64734500  |
| H | 4.56218100  | -3.26195700 | 1.10115900  |
| C | 5.23226700  | 0.03000500  | 1.99943300  |
| H | 5.97699700  | -0.15019500 | 2.79123800  |
| H | 4.64066700  | 0.91562000  | 2.27256700  |
| H | 5.78306400  | 0.26909400  | 1.07744400  |
| C | -0.23401700 | -2.76687400 | 3.44217400  |
| H | -0.31956100 | -3.00764800 | 2.37292100  |
| C | -0.49790900 | -4.02743900 | 4.26904400  |
| H | 0.27980900  | -4.79478800 | 4.14243300  |
| H | -1.46282800 | -4.47373600 | 3.98116400  |
| H | -0.55305200 | -3.79810800 | 5.34530000  |
| C | -1.31805500 | -1.73050900 | 3.73149000  |
| H | -2.31179800 | -2.14794800 | 3.50706900  |
| H | -1.18882900 | -0.84732700 | 3.09715700  |
| H | -1.31218600 | -1.42178900 | 4.78932600  |
| C | 1.72930500  | -1.46522100 | -2.77350100 |
| C | 3.09412000  | -1.23092700 | -3.07307900 |
| C | 3.40807200  | -0.56120500 | -4.25901000 |
| H | 4.45492300  | -0.37877800 | -4.50840100 |
| C | 2.41408600  | -0.11076700 | -5.11894100 |
| H | 2.68038300  | 0.41383900  | -6.03948600 |

|    |             |             |             |
|----|-------------|-------------|-------------|
| C  | 1.08011100  | -0.30980900 | -4.78973800 |
| H  | 0.30189300  | 0.06507500  | -5.45654300 |
| C  | 0.71110000  | -0.97868100 | -3.61801400 |
| C  | 4.21734900  | -1.68661400 | -2.15450900 |
| H  | 3.78950200  | -1.75968700 | -1.14222800 |
| C  | 4.75813700  | -3.06755000 | -2.53305000 |
| H  | 5.58444100  | -3.35046200 | -1.86205500 |
| H  | 5.14669100  | -3.06161900 | -3.56430900 |
| H  | 3.99624600  | -3.85188800 | -2.46521600 |
| C  | 5.37622000  | -0.69356900 | -2.09986600 |
| H  | 6.08124300  | -0.98200800 | -1.30505300 |
| H  | 5.01418200  | 0.32111100  | -1.88629100 |
| H  | 5.94757400  | -0.67795900 | -3.04140100 |
| C  | -0.75723500 | -1.19692800 | -3.31568400 |
| H  | -0.85470200 | -1.30812800 | -2.22275200 |
| C  | -1.28558100 | -2.47734500 | -3.96358100 |
| H  | -0.74858000 | -3.36749200 | -3.61617800 |
| H  | -1.17966200 | -2.42640500 | -5.05942400 |
| H  | -2.35079100 | -2.61215500 | -3.72501600 |
| C  | -1.62764700 | -0.01853500 | -3.73528500 |
| H  | -2.64005200 | -0.15897600 | -3.33615400 |
| H  | -1.71906000 | 0.05477300  | -4.83092300 |
| H  | -1.23029600 | 0.93351900  | -3.35200600 |
| C  | 1.16290500  | 0.76458400  | -0.39574600 |
| C  | 2.37994100  | 3.07090300  | -1.21198600 |
| N  | 2.26999200  | 2.86072100  | -3.77548900 |
| Si | 3.82288500  | 4.32065500  | -1.03196300 |
| C  | 3.37289500  | 5.88302600  | -1.97434100 |
| H  | 2.43505900  | 6.31532700  | -1.59113200 |
| H  | 4.16463600  | 6.64105500  | -1.86266700 |
| H  | 3.24677500  | 5.69247100  | -3.05161500 |
| C  | 3.98140000  | 4.67600200  | 0.79974900  |
| H  | 4.24305400  | 3.76052200  | 1.35067700  |
| H  | 4.76031500  | 5.43372700  | 0.98202400  |
| H  | 3.02898700  | 5.05490800  | 1.20017900  |
| C  | 5.36022200  | 3.52439100  | -1.74916700 |
| H  | 5.19479900  | 3.20891400  | -2.79191800 |
| H  | 6.20857000  | 4.22703800  | -1.73923300 |
| H  | 5.64086400  | 2.63295100  | -1.16781200 |
| H  | 1.43782000  | 3.42614200  | -0.74250800 |

Cartesian coordinates of the optimized geometry of TS-6 at PBE0-D3BJ/def2-SVP level of theory:

|    |             |             |             |
|----|-------------|-------------|-------------|
| Ga | -1.73501900 | 0.31579100  | 0.31004100  |
| Ga | 0.86087200  | -1.15232600 | 0.07119600  |
| P  | -0.30884600 | 1.51886300  | -1.09671100 |
| P  | 2.75887500  | 1.31240200  | -0.59685300 |
| O  | -0.82352500 | -1.19500600 | 0.75287700  |
| N  | -2.11862600 | 1.74090700  | 1.69689900  |
| N  | -3.60581800 | -0.35483100 | 0.32739200  |
| N  | 1.78730400  | -2.34484900 | 1.36318600  |
| N  | 1.32858200  | -2.28333300 | -1.51159200 |
| N  | 1.94967900  | 2.85356900  | -2.64424200 |
| C  | -3.13985400 | 1.66562000  | 2.53667400  |
| C  | -4.10272700 | 0.64330200  | 2.48310900  |
| H  | -4.83482400 | 0.63959900  | 3.28950300  |
| C  | -4.37034400 | -0.22318600 | 1.41434500  |
| C  | -3.37356600 | 2.73817300  | 3.56683200  |
| H  | -3.68383300 | 2.28034000  | 4.51672700  |
| H  | -4.19748100 | 3.38898900  | 3.23664200  |
| H  | -2.49069200 | 3.36547600  | 3.73295100  |
| C  | -5.65030500 | -1.00954000 | 1.50616200  |
| H  | -5.43887900 | -2.08570300 | 1.54871800  |
| H  | -6.27449500 | -0.85440300 | 0.61501400  |
| H  | -6.22000500 | -0.72462500 | 2.39808300  |
| C  | -1.36366700 | 2.94896200  | 1.59723900  |

|   |             |             |             |
|---|-------------|-------------|-------------|
| C | -0.08486500 | 3.02949900  | 2.19046700  |
| C | 0.64696200  | 4.20775300  | 2.02596500  |
| H | 1.63393100  | 4.28621500  | 2.48257200  |
| C | 0.14447000  | 5.28020800  | 1.29512200  |
| H | 0.73431800  | 6.19429700  | 1.18540300  |
| C | -1.11076300 | 5.18255900  | 0.71109500  |
| H | -1.50108900 | 6.01948600  | 0.12653300  |
| C | -1.88154300 | 4.02391400  | 0.84354400  |
| C | 0.48710600  | 1.87648300  | 2.98917700  |
| H | 0.20988300  | 0.95106900  | 2.45414400  |
| C | -0.10805300 | 1.80115500  | 4.39702600  |
| H | 0.37630400  | 0.99155700  | 4.96268000  |
| H | -1.18542300 | 1.59726600  | 4.38935800  |
| H | 0.06113700  | 2.74628400  | 4.93815400  |
| C | 2.00501900  | 1.90980900  | 3.08452800  |
| H | 2.35875500  | 2.74952300  | 3.70503000  |
| H | 2.46612600  | 1.98361900  | 2.08825400  |
| H | 2.36271600  | 0.98778200  | 3.55747000  |
| C | -3.21447200 | 3.95087400  | 0.12299900  |
| H | -3.64199200 | 2.95384700  | 0.30559500  |
| C | -4.20856700 | 4.98718500  | 0.64799400  |
| H | -4.35383000 | 4.90396700  | 1.73466800  |
| H | -5.18967600 | 4.86378400  | 0.16289100  |
| H | -3.86250000 | 6.01226700  | 0.44008000  |
| C | -3.02706300 | 4.10245800  | -1.38695200 |
| H | -2.64050500 | 5.10208000  | -1.64147400 |
| H | -3.98722200 | 3.97894200  | -1.91009900 |
| H | -2.31267300 | 3.36248900  | -1.77767900 |
| C | -4.09997400 | -1.17358100 | -0.73331900 |
| C | -3.94371500 | -2.57616400 | -0.69380000 |
| C | -4.54626500 | -3.33461900 | -1.70432300 |
| H | -4.44231900 | -4.42238700 | -1.68339300 |
| C | -5.26468800 | -2.73633900 | -2.73017900 |
| H | -5.73242200 | -3.34922100 | -3.50439700 |
| C | -5.36460700 | -1.34963200 | -2.78398100 |
| H | -5.90084900 | -0.88505900 | -3.61261700 |
| C | -4.78106000 | -0.54483100 | -1.80232100 |
| C | -3.13508200 | -3.28879800 | 0.37580900  |
| H | -2.75373300 | -2.52877800 | 1.07199600  |
| C | -3.94731500 | -4.32624400 | 1.15208700  |
| H | -3.32924300 | -4.76645400 | 1.95049400  |
| H | -4.27931900 | -5.15213300 | 0.50251700  |
| H | -4.84520600 | -3.90240800 | 1.62554800  |
| C | -1.90560800 | -3.95174000 | -0.24230400 |
| H | -1.27720100 | -4.40125900 | 0.54116900  |
| H | -1.29108100 | -3.21017100 | -0.76466000 |
| H | -2.18690500 | -4.74785400 | -0.95151200 |
| C | -4.86737500 | 0.97101700  | -1.88888700 |
| H | -3.89999100 | 1.35704200  | -1.52458800 |
| C | -5.95989200 | 1.55385100  | -0.98873600 |
| H | -5.76884500 | 1.37017400  | 0.07654000  |
| H | -6.94331400 | 1.12683700  | -1.24341800 |
| H | -6.02403300 | 2.64484500  | -1.12561300 |
| C | -5.05352700 | 1.47905300  | -3.31573500 |
| H | -4.31046500 | 1.05365700  | -4.00503900 |
| H | -4.94741000 | 2.57336800  | -3.34138000 |
| H | -6.05696500 | 1.24473900  | -3.70516400 |
| C | 1.90153800  | -3.64630300 | 1.10593100  |
| C | 1.64879100  | -4.23557600 | -0.14253100 |
| H | 1.73078100  | -5.32132100 | -0.17635200 |
| C | 1.47907700  | -3.59995400 | -1.37885300 |
| C | 2.33712600  | -4.58344400 | 2.19977500  |
| H | 2.66069700  | -5.54355200 | 1.78101400  |
| H | 1.50126100  | -4.77083000 | 2.88806900  |
| H | 3.14986600  | -4.15576500 | 2.80130300  |
| C | 1.46820500  | -4.50575200 | -2.58317100 |
| H | 2.23359400  | -5.28799400 | -2.49827700 |
| H | 1.60526600  | -3.96186700 | -3.52431200 |

|    |             |             |             |
|----|-------------|-------------|-------------|
| H  | 0.49187700  | -5.01464300 | -2.61635000 |
| C  | 2.12180800  | -1.88730300 | 2.67252200  |
| C  | 3.41098800  | -1.34704600 | 2.87880100  |
| C  | 3.78881200  | -1.00326500 | 4.17878600  |
| H  | 4.78616900  | -0.59850000 | 4.35955300  |
| C  | 2.90411300  | -1.14564300 | 5.24327400  |
| H  | 3.21304300  | -0.86616400 | 6.25333700  |
| C  | 1.62013800  | -1.62367000 | 5.01350200  |
| H  | 0.92271400  | -1.71420100 | 5.85021000  |
| C  | 1.19905800  | -2.00999200 | 3.73534100  |
| C  | 4.36699800  | -1.15772100 | 1.71544800  |
| H  | 3.74679800  | -0.95313900 | 0.82710500  |
| C  | 5.17255800  | -2.42504800 | 1.42347000  |
| H  | 5.74316400  | -2.73956200 | 2.31220800  |
| H  | 5.89027700  | -2.24511500 | 0.60818000  |
| H  | 4.52982600  | -3.26105200 | 1.11539700  |
| C  | 5.29348700  | 0.04091100  | 1.88807900  |
| H  | 6.05437200  | -0.13116600 | 2.66620600  |
| H  | 4.72870100  | 0.94765800  | 2.14854800  |
| H  | 5.82554800  | 0.23733900  | 0.94514400  |
| C  | -0.20851600 | -2.55524000 | 3.55478500  |
| H  | -0.32342200 | -2.84086900 | 2.49956000  |
| C  | -0.48172600 | -3.77057100 | 4.44418700  |
| H  | 0.27135600  | -4.56444200 | 4.33341700  |
| H  | -1.46479000 | -4.20333500 | 4.20036800  |
| H  | -0.50337800 | -3.49255100 | 5.51013000  |
| C  | -1.26436400 | -1.48433800 | 3.82148600  |
| H  | -2.27124300 | -1.89065000 | 3.63901900  |
| H  | -1.13249900 | -0.63342300 | 3.14526100  |
| H  | -1.22803600 | -1.12892600 | 4.86394400  |
| C  | 1.61272100  | -1.66729500 | -2.77007800 |
| C  | 2.96736500  | -1.44681600 | -3.11807400 |
| C  | 3.24825500  | -0.87119200 | -4.36017200 |
| H  | 4.28780400  | -0.70194800 | -4.64769700 |
| C  | 2.23011500  | -0.50209700 | -5.23069800 |
| H  | 2.46960300  | -0.05492000 | -6.19871000 |
| C  | 0.90568000  | -0.68889200 | -4.85739700 |
| H  | 0.10902200  | -0.37496600 | -5.53353200 |
| C  | 0.56929200  | -1.26242500 | -3.62740300 |
| C  | 4.11485900  | -1.82243100 | -2.19366800 |
| H  | 3.70674100  | -1.84246300 | -1.17101700 |
| C  | 4.67831400  | -3.21216200 | -2.49924200 |
| H  | 5.51938300  | -3.44034100 | -1.82575400 |
| H  | 5.05163600  | -3.25971900 | -3.53505200 |
| H  | 3.93208600  | -4.00480700 | -2.37471200 |
| C  | 5.25047700  | -0.80204900 | -2.21944900 |
| H  | 5.97621100  | -1.02640200 | -1.42238200 |
| H  | 4.86438400  | 0.21324600  | -2.05450600 |
| H  | 5.80351600  | -0.82619500 | -3.17172400 |
| C  | -0.88894600 | -1.46634200 | -3.26972700 |
| H  | -0.95760300 | -1.46373000 | -2.16915500 |
| C  | -1.41762700 | -2.81194900 | -3.76796200 |
| H  | -0.87031200 | -3.65758500 | -3.33651000 |
| H  | -1.33209900 | -2.87819700 | -4.86482000 |
| H  | -2.47765600 | -2.92511900 | -3.49659400 |
| C  | -1.78536100 | -0.34660600 | -3.78360800 |
| H  | -2.78743900 | -0.46325200 | -3.35171300 |
| H  | -1.89902900 | -0.38156200 | -4.87921400 |
| H  | -1.39482300 | 0.64108900  | -3.49815400 |
| C  | 1.14160100  | 0.73409800  | -0.51373700 |
| C  | 2.44244800  | 3.05044200  | -1.35122000 |
| N  | 1.33313700  | 2.46882600  | -3.49672300 |
| Si | 3.95248100  | 4.23012800  | -1.25348100 |
| C  | 3.44380300  | 5.88420700  | -1.98123300 |
| H  | 2.58322100  | 6.30153500  | -1.43493500 |
| H  | 4.26960600  | 6.61091700  | -1.92084400 |
| H  | 3.16039300  | 5.78869600  | -3.04140400 |
| C  | 4.35534900  | 4.37026300  | 0.56633600  |

|   |            |            |             |
|---|------------|------------|-------------|
| H | 4.58804900 | 3.38208900 | 0.99086600  |
| H | 5.22439900 | 5.02997300 | 0.71731500  |
| H | 3.50324900 | 4.78782500 | 1.12308100  |
| C | 5.34916600 | 3.45098700 | -2.22982700 |
| H | 5.05701700 | 3.27321700 | -3.27697200 |
| H | 6.23818900 | 4.10135100 | -2.23352400 |
| H | 5.63210400 | 2.48272800 | -1.78926400 |
| H | 1.53785500 | 3.44143000 | -0.81694200 |

Cartesian coordinates of the optimized geometry of TS-7 at PBE0-D3BJ/def2-SVP level of theory:

|    |             |             |             |
|----|-------------|-------------|-------------|
| Ga | -1.77703700 | 0.02804000  | 0.20401000  |
| Ga | 1.10283300  | -1.00644500 | 0.11407800  |
| P  | -0.40410900 | 1.42473500  | -1.17546000 |
| P  | 2.51300700  | 1.87835000  | -0.52955200 |
| O  | -0.63583400 | -1.33570300 | 0.55019000  |
| N  | -2.62446900 | 1.11046600  | 1.63547900  |
| N  | -3.42865800 | -0.99684400 | -0.20951800 |
| N  | 2.02591800  | -2.11642700 | 1.47072300  |
| N  | 2.03369500  | -1.91838200 | -1.42482900 |
| C  | -3.67408500 | 0.64894900  | 2.31582200  |
| C  | -4.38868800 | -0.50076400 | 1.95770200  |
| H  | -5.18684000 | -0.79284900 | 2.63809900  |
| C  | -4.34630800 | -1.19201600 | 0.73661700  |
| C  | -4.20849400 | 1.42604100  | 3.48713400  |
| H  | -4.71023000 | 0.74849600  | 4.19037400  |
| H  | -4.95225700 | 2.15922800  | 3.13993900  |
| H  | -3.42358000 | 1.98789200  | 4.00643800  |
| C  | -5.44634400 | -2.19153300 | 0.50530000  |
| H  | -5.04585400 | -3.21315100 | 0.54545400  |
| H  | -5.89322100 | -2.07279100 | -0.49088000 |
| H  | -6.22767400 | -2.09246200 | 1.26750900  |
| C  | -2.24778400 | 2.47312300  | 1.85341000  |
| C  | -1.10252100 | 2.78323500  | 2.61033800  |
| C  | -0.80307900 | 4.12884800  | 2.83959000  |
| H  | 0.08012200  | 4.38574700  | 3.42648700  |
| C  | -1.60033500 | 5.14399100  | 2.32687100  |
| H  | -1.34744600 | 6.18947200  | 2.51777100  |
| C  | -2.70337500 | 4.82262800  | 1.54739900  |
| H  | -3.30644100 | 5.62323800  | 1.11197400  |
| C  | -3.04059700 | 3.49322900  | 1.28590200  |
| C  | -0.21967800 | 1.70302900  | 3.19660800  |
| H  | -0.33244300 | 0.80364000  | 2.56854200  |
| C  | -0.66391300 | 1.34012900  | 4.61423800  |
| H  | 0.00474400  | 0.57855100  | 5.03969800  |
| H  | -1.68537600 | 0.93658200  | 4.63601200  |
| H  | -0.63421300 | 2.22923900  | 5.26470700  |
| C  | 1.25604300  | 2.07997800  | 3.18058400  |
| H  | 1.48390700  | 2.88844100  | 3.89319900  |
| H  | 1.58090500  | 2.39608300  | 2.17878800  |
| H  | 1.85855700  | 1.21191200  | 3.47498700  |
| C  | -4.18384000 | 3.20325500  | 0.33101900  |
| H  | -4.35215700 | 2.11623200  | 0.31543200  |
| C  | -5.49508000 | 3.86375800  | 0.75434600  |
| H  | -5.78435500 | 3.58424100  | 1.77834700  |
| H  | -6.31241200 | 3.56400600  | 0.08004200  |
| H  | -5.42607900 | 4.96227200  | 0.71909400  |
| C  | -3.79718000 | 3.63045400  | -1.08651200 |
| H  | -3.58102700 | 4.70926100  | -1.12790300 |
| H  | -4.61583400 | 3.42470900  | -1.79256300 |
| H  | -2.89674500 | 3.10497500  | -1.43632100 |
| C  | -3.56693500 | -1.72920200 | -1.42824000 |
| C  | -3.14611700 | -3.07508100 | -1.50947600 |
| C  | -3.41135600 | -3.77401500 | -2.69270500 |
| H  | -3.09952900 | -4.81847000 | -2.77157900 |
| C  | -4.05993100 | -3.17226900 | -3.76292000 |

|   |             |             |             |
|---|-------------|-------------|-------------|
| H | -4.26406700 | -3.74202200 | -4.67250600 |
| C | -4.42970400 | -1.83381300 | -3.68111000 |
| H | -4.91282400 | -1.35852700 | -4.53618700 |
| C | -4.18176000 | -1.08688400 | -2.52672800 |
| C | -2.41440400 | -3.78699700 | -0.38441000 |
| H | -2.32546500 | -3.08474500 | 0.45631900  |
| C | -3.12871500 | -5.05574000 | 0.08519200  |
| H | -2.59937100 | -5.48702600 | 0.94932100  |
| H | -3.14681200 | -5.82486200 | -0.70344700 |
| H | -4.17074200 | -4.87894300 | 0.38913900  |
| C | -0.98714900 | -4.13304800 | -0.80337800 |
| H | -0.43609400 | -4.57414200 | 0.04082100  |
| H | -0.44515800 | -3.23285900 | -1.11128400 |
| H | -0.97299000 | -4.85857900 | -1.63321900 |
| C | -4.57686600 | 0.37787700  | -2.45093300 |
| H | -3.82724500 | 0.87307400  | -1.81207000 |
| C | -5.94121600 | 0.57041000  | -1.78413700 |
| H | -5.94370900 | 0.23885500  | -0.73716600 |
| H | -6.72097200 | 0.01000600  | -2.32448700 |
| H | -6.22649100 | 1.63387200  | -1.79181500 |
| C | -4.55118400 | 1.07648400  | -3.80697200 |
| H | -3.59744600 | 0.91814300  | -4.32988500 |
| H | -4.68604800 | 2.15980000  | -3.67423900 |
| H | -5.36475100 | 0.72953100  | -4.46334500 |
| C | 2.43121800  | -3.35253000 | 1.17626800  |
| C | 2.50739300  | -3.87922000 | -0.12085900 |
| H | 2.81500000  | -4.92199200 | -0.19082900 |
| C | 2.44163100  | -3.18046000 | -1.33339800 |
| C | 2.86208000  | -4.27448800 | 2.28484800  |
| H | 3.42039700  | -5.12780300 | 1.88265200  |
| H | 1.98151100  | -4.65815100 | 2.81818300  |
| H | 3.47860800  | -3.75485600 | 3.02982700  |
| C | 2.87853800  | -3.94769800 | -2.55293400 |
| H | 3.85403800  | -4.42296100 | -2.38422800 |
| H | 2.93027900  | -3.32085600 | -3.44991000 |
| H | 2.15346800  | -4.75759400 | -2.73036800 |
| C | 2.08794700  | -1.70222600 | 2.83581300  |
| C | 3.20555400  | -0.94307200 | 3.24769400  |
| C | 3.33369700  | -0.62856500 | 4.60305800  |
| H | 4.19648000  | -0.05177700 | 4.94096600  |
| C | 2.37516600  | -1.03244600 | 5.52616300  |
| H | 2.49220400  | -0.78095700 | 6.58293800  |
| C | 1.25931100  | -1.74012500 | 5.09677100  |
| H | 0.49882400  | -2.03654000 | 5.82359500  |
| C | 1.08401700  | -2.08661500 | 3.75238900  |
| C | 4.26981200  | -0.51732600 | 2.25218000  |
| H | 3.77628400  | -0.42088300 | 1.27125400  |
| C | 5.35186400  | -1.59171800 | 2.11884300  |
| H | 5.80941600  | -1.80651200 | 3.09796400  |
| H | 6.15001700  | -1.25590800 | 1.44029300  |
| H | 4.95099200  | -2.53276000 | 1.71713200  |
| C | 4.88991200  | 0.83832900  | 2.57384100  |
| H | 5.50852200  | 0.80571900  | 3.48475800  |
| H | 4.12055800  | 1.61270900  | 2.70226300  |
| H | 5.54357300  | 1.15359600  | 1.74752600  |
| C | -0.16355600 | -2.85279900 | 3.34484300  |
| H | -0.08744900 | -3.06832400 | 2.26950900  |
| C | -0.33176100 | -4.16425100 | 4.11517300  |
| H | 0.55417700  | -4.81352200 | 4.06198800  |
| H | -1.18735900 | -4.73041000 | 3.71456300  |
| H | -0.53403200 | -3.98069700 | 5.18245500  |
| C | -1.41638400 | -1.99760200 | 3.52361700  |
| H | -2.30300500 | -2.53534900 | 3.15422000  |
| H | -1.33684600 | -1.06818400 | 2.95066400  |
| H | -1.58816300 | -1.74987700 | 4.58359600  |
| C | 2.40090800  | -1.12092900 | -2.55309900 |
| C | 3.73620100  | -0.66966500 | -2.67628800 |
| C | 4.05001800  | 0.19970700  | -3.72610500 |

|    |             |             |             |
|----|-------------|-------------|-------------|
| H  | 5.07531400  | 0.56158100  | -3.82949600 |
| C  | 3.08360800  | 0.62992000  | -4.62264400 |
| H  | 3.34660800  | 1.32442100  | -5.42409900 |
| C  | 1.77824700  | 0.16910000  | -4.49696500 |
| H  | 1.02361300  | 0.50480700  | -5.20870300 |
| C  | 1.41432400  | -0.71522400 | -3.47911600 |
| C  | 4.85601800  | -1.09231400 | -1.73783800 |
| H  | 4.40507600  | -1.61987800 | -0.88332500 |
| C  | 5.82379700  | -2.05404600 | -2.43406700 |
| H  | 6.57874500  | -2.42552700 | -1.72318700 |
| H  | 6.35762300  | -1.54091600 | -3.25001600 |
| H  | 5.31227800  | -2.92002900 | -2.87278500 |
| C  | 5.63888100  | 0.09835000  | -1.18461000 |
| H  | 6.41264800  | -0.24830600 | -0.48300100 |
| H  | 4.98057700  | 0.80590200  | -0.66188800 |
| H  | 6.15577900  | 0.64876600  | -1.98606700 |
| C  | 0.00195000  | -1.26231400 | -3.41595300 |
| H  | -0.28466600 | -1.32794100 | -2.35036200 |
| C  | -0.06723300 | -2.67795000 | -3.99197900 |
| H  | 0.56041600  | -3.38183000 | -3.43500800 |
| H  | 0.26621800  | -2.67973200 | -5.04217000 |
| H  | -1.10121800 | -3.05052400 | -3.95549100 |
| C  | -1.02721800 | -0.38690700 | -4.11790300 |
| H  | -2.03204200 | -0.77813100 | -3.91514300 |
| H  | -0.89041300 | -0.39731700 | -5.21109900 |
| H  | -0.98343600 | 0.65603900  | -3.77044500 |
| C  | 1.10580300  | 0.87657500  | -0.48906600 |
| C  | 2.01458200  | 3.28068200  | -1.44306400 |
| Si | 3.18352600  | 4.73675600  | -1.62742000 |
| C  | 2.26671000  | 6.16011500  | -2.44638700 |
| H  | 1.38306000  | 6.43631000  | -1.85060300 |
| H  | 2.90991000  | 7.04922600  | -2.54341300 |
| H  | 1.92292000  | 5.87915900  | -3.45463700 |
| C  | 3.76059300  | 5.22228100  | 0.09494400  |
| H  | 4.27398500  | 4.37814100  | 0.58241700  |
| H  | 4.45229100  | 6.07916700  | 0.07006700  |
| H  | 2.89302600  | 5.49296400  | 0.71727300  |
| C  | 4.65096100  | 4.21025200  | -2.68730500 |
| H  | 4.31138500  | 3.85901000  | -3.67456900 |
| H  | 5.36017600  | 5.03962900  | -2.84113400 |
| H  | 5.18928400  | 3.37864800  | -2.20560800 |
| N  | 0.43344200  | 4.04779400  | -0.47930200 |
| N  | -0.45912800 | 3.32573100  | -0.39658900 |
| H  | 1.32359400  | 3.05988600  | -2.27759600 |

Cartesian coordinates of the optimized geometry of TS-8 at PBE0-D3BJ/def2-SVP level of theory:

|    |             |             |             |
|----|-------------|-------------|-------------|
| Ga | -1.55794800 | -0.26203800 | 0.34108600  |
| Ga | 1.46962200  | -0.64033100 | 0.03720000  |
| P  | -0.70749000 | 1.16186700  | -1.39971300 |
| P  | 1.72173200  | 2.52853100  | -1.32699400 |
| O  | -0.08103400 | -1.22942900 | 0.78868000  |
| N  | -2.46837700 | 0.95029200  | 1.64413100  |
| N  | -2.93309900 | -1.70594600 | 0.53847700  |
| N  | 2.78979000  | -1.13875700 | 1.42397500  |
| N  | 2.38871100  | -1.67596000 | -1.39856700 |
| C  | -3.28712900 | 0.49766400  | 2.59385200  |
| C  | -3.74961500 | -0.82086100 | 2.64543300  |
| H  | -4.37306700 | -1.07260000 | 3.50118400  |
| C  | -3.66241700 | -1.80822600 | 1.64693100  |
| C  | -3.78515700 | 1.44413300  | 3.64897300  |
| H  | -4.47951600 | 0.94245000  | 4.33286800  |
| H  | -4.29038400 | 2.30882100  | 3.19501100  |
| H  | -2.94118800 | 1.84635800  | 4.22751800  |
| C  | -4.50440700 | -3.03624800 | 1.86644800  |
| H  | -3.86996400 | -3.91975700 | 2.01141600  |



|   |             |             |             |
|---|-------------|-------------|-------------|
| H | -5.12861700 | -3.24885600 | 0.98774700  |
| H | -5.14789000 | -2.91519200 | 2.74530500  |
| C | -2.38629700 | 2.36321300  | 1.44207700  |
| C | -1.44737100 | 3.15032000  | 2.13796800  |
| C | -1.44341300 | 4.53271600  | 1.92448300  |
| H | -0.71562000 | 5.15030100  | 2.45595000  |
| C | -2.34440900 | 5.13197600  | 1.05392800  |
| H | -2.33510400 | 6.21493400  | 0.91094400  |
| C | -3.25897600 | 4.34409400  | 0.36534800  |
| H | -3.97081100 | 4.81584100  | -0.31637200 |
| C | -3.29711800 | 2.95854200  | 0.53957700  |
| C | -0.43379800 | 2.54581700  | 3.08328700  |
| H | -0.67877800 | 1.48041000  | 3.19676200  |
| C | -0.45729000 | 3.18199300  | 4.47234800  |
| H | 0.23101500  | 2.64301500  | 5.14153100  |
| H | -1.46059200 | 3.16381500  | 4.92513200  |
| H | -0.12887500 | 4.23289600  | 4.44207100  |
| C | 0.96225700  | 2.63162600  | 2.47891200  |
| H | 1.25296400  | 3.67911900  | 2.29755900  |
| H | 1.01150500  | 2.10752900  | 1.51477900  |
| H | 1.70091500  | 2.18411600  | 3.15416300  |
| C | -4.34521200 | 2.14889500  | -0.19876200 |
| H | -4.12344300 | 1.08595500  | -0.02431100 |
| C | -5.74024800 | 2.42085200  | 0.36664200  |
| H | -5.79793000 | 2.17544400  | 1.43741900  |
| H | -6.49828600 | 1.81766100  | -0.15587000 |
| H | -6.01545400 | 3.48123200  | 0.25007900  |
| C | -4.29988200 | 2.38791700  | -1.70584100 |
| H | -4.54941600 | 3.42865000  | -1.96445400 |
| H | -5.02848800 | 1.74188000  | -2.21831900 |
| H | -3.30106000 | 2.17299400  | -2.11491800 |
| C | -3.01008700 | -2.78601900 | -0.39496800 |
| C | -2.26125400 | -3.96588000 | -0.18818500 |
| C | -2.47165900 | -5.03881000 | -1.06221100 |
| H | -1.90702300 | -5.96228600 | -0.91137000 |
| C | -3.37466900 | -4.95436400 | -2.11299300 |
| H | -3.52807100 | -5.80858800 | -2.77664000 |
| C | -4.06482300 | -3.76709000 | -2.33400300 |
| H | -4.74643700 | -3.69541800 | -3.18265000 |
| C | -3.89023700 | -2.66347700 | -1.49509100 |
| C | -1.22996800 | -4.11508000 | 0.91755800  |
| H | -1.20367400 | -3.17273800 | 1.48170800  |
| C | -1.53035200 | -5.27269000 | 1.87093600  |
| H | -0.77668400 | -5.30212200 | 2.67363600  |
| H | -1.49503900 | -6.24496100 | 1.35364100  |
| H | -2.51692600 | -5.19331300 | 2.35029200  |
| C | 0.16599000  | -4.29134900 | 0.32250700  |
| H | 0.92322400  | -4.31090800 | 1.12075500  |
| H | 0.41165900  | -3.45399600 | -0.33945000 |
| H | 0.25085700  | -5.23197500 | -0.24628100 |
| C | -4.62790600 | -1.36195800 | -1.76517500 |
| H | -3.93009800 | -0.54882800 | -1.50051500 |
| C | -5.87409700 | -1.20293000 | -0.89093100 |
| H | -5.63113300 | -1.11648400 | 0.17629700  |
| H | -6.55379100 | -2.05984900 | -1.02405800 |
| H | -6.42533700 | -0.29368700 | -1.17573100 |
| C | -5.00377000 | -1.17653500 | -3.23256300 |
| H | -4.14435700 | -1.32537600 | -3.90131700 |
| H | -5.38370100 | -0.15725400 | -3.39573000 |
| H | -5.80278000 | -1.86925700 | -3.54074000 |
| C | 3.47334400  | -2.27996800 | 1.33035300  |
| C | 3.53518200  | -3.07882800 | 0.17904700  |
| H | 4.10007600  | -4.00535500 | 0.27528700  |
| C | 3.12965200  | -2.74396600 | -1.12070000 |
| C | 4.25767100  | -2.76580200 | 2.51849100  |
| H | 4.92698300  | -3.58585600 | 2.23408600  |
| H | 3.57584800  | -3.12673200 | 3.30079700  |
| H | 4.84684300  | -1.95569700 | 2.96911200  |

|    |             |             |             |
|----|-------------|-------------|-------------|
| C  | 3.59308600  | -3.66931400 | -2.21403500 |
| H  | 4.67054300  | -3.86465000 | -2.12975500 |
| H  | 3.37140300  | -3.28300400 | -3.21497600 |
| H  | 3.08032600  | -4.63613800 | -2.08886400 |
| C  | 2.89478400  | -0.38663700 | 2.63276200  |
| C  | 3.81086000  | 0.68735500  | 2.66944200  |
| C  | 3.99879000  | 1.36308600  | 3.87743400  |
| H  | 4.71538800  | 2.18495500  | 3.92723600  |
| C  | 3.26859300  | 1.02103800  | 5.01107700  |
| H  | 3.42326000  | 1.56304900  | 5.94707600  |
| C  | 2.32488700  | 0.00368900  | 4.94093800  |
| H  | 1.73500300  | -0.24390900 | 5.82710500  |
| C  | 2.11817900  | -0.72358500 | 3.76283600  |
| C  | 4.58715400  | 1.09446100  | 1.43090400  |
| H  | 3.99056600  | 0.77751500  | 0.56054800  |
| C  | 5.92919000  | 0.36431000  | 1.35320100  |
| H  | 6.53827500  | 0.57099900  | 2.24792800  |
| H  | 6.50142600  | 0.69267000  | 0.47230200  |
| H  | 5.79837900  | -0.72442600 | 1.27549000  |
| C  | 4.77248000  | 2.60456100  | 1.31927700  |
| H  | 5.45177800  | 2.99771600  | 2.09211900  |
| H  | 3.81049200  | 3.13121000  | 1.40302200  |
| H  | 5.20750800  | 2.85899300  | 0.34201100  |
| C  | 1.07615400  | -1.82893700 | 3.75348100  |
| H  | 1.10050200  | -2.30314100 | 2.76174300  |
| C  | 1.33259600  | -2.88923600 | 4.82629800  |
| H  | 2.34707500  | -3.31181000 | 4.77801600  |
| H  | 0.61765600  | -3.71967900 | 4.71563400  |
| H  | 1.20077300  | -2.47804200 | 5.83981700  |
| C  | -0.32953200 | -1.25562800 | 3.91876800  |
| H  | -1.08073700 | -2.05970100 | 3.88841100  |
| H  | -0.55398200 | -0.56972600 | 3.09500600  |
| H  | -0.44222600 | -0.72334300 | 4.87750600  |
| C  | 2.37185200  | -1.13295900 | -2.72002900 |
| C  | 3.49906100  | -0.41626400 | -3.18066600 |
| C  | 3.45336300  | 0.14150100  | -4.46200500 |
| H  | 4.31845600  | 0.69578000  | -4.83310600 |
| C  | 2.32552500  | 0.02166000  | -5.26122600 |
| H  | 2.30592700  | 0.47306700  | -6.25599300 |
| C  | 1.21524200  | -0.66526000 | -4.78411000 |
| H  | 0.32592600  | -0.74399300 | -5.41053500 |
| C  | 1.21426600  | -1.25222800 | -3.51704400 |
| C  | 4.75426700  | -0.22267200 | -2.34668500 |
| H  | 4.53729000  | -0.57078100 | -1.32535200 |
| C  | 5.92236900  | -1.05177100 | -2.88525600 |
| H  | 6.80315000  | -0.95002300 | -2.23163000 |
| H  | 6.21138900  | -0.70939100 | -3.89193200 |
| H  | 5.67555500  | -2.11891200 | -2.95979200 |
| C  | 5.15774500  | 1.24860400  | -2.25771600 |
| H  | 6.02345300  | 1.36745100  | -1.58856000 |
| H  | 4.33417500  | 1.87311800  | -1.88334000 |
| H  | 5.45394900  | 1.64535800  | -3.24123300 |
| C  | 0.00764800  | -2.03157600 | -3.03735900 |
| H  | -0.06734100 | -1.88866300 | -1.94455400 |
| C  | 0.17713200  | -3.53068700 | -3.28821400 |
| H  | 1.05362800  | -3.93752600 | -2.76989700 |
| H  | 0.29801400  | -3.72789300 | -4.36563500 |
| H  | -0.70774800 | -4.07825400 | -2.93211300 |
| C  | -1.30163100 | -1.55189200 | -3.64792800 |
| H  | -2.13685600 | -2.05754300 | -3.14854600 |
| H  | -1.36899100 | -1.79716000 | -4.71997100 |
| H  | -1.42934500 | -0.46473300 | -3.53084300 |
| C  | 0.93964200  | 1.05777400  | -0.81787700 |
| C  | 0.25459100  | 3.48864500  | -1.30747200 |
| H  | -0.36324600 | 3.40741000  | -0.40218900 |
| Si | 0.00522500  | 4.98506100  | -2.41272100 |
| C  | 1.25349100  | 4.89672700  | -3.81859700 |
| H  | 2.28559500  | 4.90993400  | -3.43333300 |

|   |             |            |             |
|---|-------------|------------|-------------|
| H | 1.12617000  | 3.96417000 | -4.39103000 |
| H | 1.13679500  | 5.74639000 | -4.51028500 |
| C | 0.26887900  | 6.57440900 | -1.43011300 |
| H | 1.29475100  | 6.61787500 | -1.03212800 |
| H | 0.10771300  | 7.46386800 | -2.06069400 |
| H | -0.42567500 | 6.62606900 | -0.57817500 |
| C | -1.74265100 | 4.95261400 | -3.10911900 |
| H | -1.91200700 | 4.02376000 | -3.67496000 |
| H | -2.48261500 | 4.99212300 | -2.29648400 |
| H | -1.91672200 | 5.80845100 | -3.78096600 |

Cartesian coordinates of the optimized geometry of TS-9 at PBE0-D3BJ/def2-SVP level of theory:

|    |             |             |             |
|----|-------------|-------------|-------------|
| Ga | 1.74381300  | -0.17841800 | -0.39853000 |
| Ga | -1.79204100 | -0.14775400 | 0.30530300  |
| P  | -0.09253000 | -1.33595900 | -0.85175600 |
| P  | -0.72046300 | -0.60066700 | 2.29296000  |
| O  | 1.42313200  | -2.14284600 | 1.50094200  |
| C  | 0.41396900  | -1.51237200 | 1.24689800  |
| N  | 2.44090100  | 1.38082900  | 0.46458500  |
| N  | 3.42400000  | -0.98888000 | -0.88533300 |
| N  | -2.43600300 | 1.53123100  | -0.47861600 |
| N  | -3.49666100 | -1.11272800 | 0.07181400  |
| C  | 3.74221400  | 1.69103800  | 0.42695500  |
| C  | 4.73225500  | 0.89313900  | -0.15672300 |
| H  | 5.74697000  | 1.28450600  | -0.10816100 |
| C  | 4.59481000  | -0.39053700 | -0.71476700 |
| C  | 4.18998600  | 2.96862100  | 1.07653800  |
| H  | 5.25456800  | 3.14989700  | 0.89056100  |
| H  | 4.03296800  | 2.92598600  | 2.16591000  |
| H  | 3.61343300  | 3.82873500  | 0.70425800  |
| C  | 5.84611000  | -1.11246200 | -1.11860000 |
| H  | 6.73507900  | -0.49620800 | -0.94280100 |
| H  | 5.81424500  | -1.39140800 | -2.18321900 |
| H  | 5.95014600  | -2.04825900 | -0.54756300 |
| C  | -3.71922500 | 1.77473800  | -0.73609100 |
| C  | -4.74467000 | 0.82855000  | -0.61237800 |
| H  | -5.74769500 | 1.17810700  | -0.85198800 |
| C  | -4.63085200 | -0.53781800 | -0.27864700 |
| C  | -4.11429000 | 3.14537900  | -1.21592500 |
| H  | -3.68831200 | 3.35270500  | -2.21082200 |
| H  | -3.74235300 | 3.92788800  | -0.53676200 |
| H  | -5.20423700 | 3.23527100  | -1.28924600 |
| C  | -5.88467900 | -1.36539700 | -0.33525400 |
| H  | -5.76541600 | -2.20767700 | -1.03442600 |
| H  | -6.74384400 | -0.76492200 | -0.65585500 |
| H  | -6.11113100 | -1.80049700 | 0.65099900  |
| C  | 1.52365700  | 2.22337300  | 1.21645000  |
| H  | 1.90061300  | 2.41986800  | 2.23110400  |
| H  | 1.34651100  | 3.19027800  | 0.71595500  |
| H  | 0.57041100  | 1.68997500  | 1.34421600  |
| C  | 3.35220600  | -2.35031500 | -1.38493100 |
| H  | 2.29485100  | -2.62528400 | -1.50649200 |
| H  | 3.85278600  | -2.45602400 | -2.36077500 |
| H  | 3.80354300  | -3.06050600 | -0.67386400 |
| C  | -1.43657500 | 2.53864000  | -0.74295800 |
| H  | -1.38996900 | 3.31010800  | 0.04720800  |
| H  | -0.45203900 | 2.05197000  | -0.79391600 |
| H  | -1.59229800 | 3.04812300  | -1.70685500 |
| C  | -3.44193800 | -2.52560700 | 0.37916500  |
| H  | -4.20188100 | -2.82274500 | 1.12017800  |
| H  | -3.57748400 | -3.14816600 | -0.52233700 |
| H  | -2.45808100 | -2.75520100 | 0.81357600  |

Cartesian coordinates of the optimized geometry of TS-10 at PBE0-D3BJ/def2-SVP level of theory:

|    |             |             |             |
|----|-------------|-------------|-------------|
| Ga | 2.46764500  | -0.16666800 | 0.56490600  |
| Ga | -2.62494000 | -0.61962400 | -0.04744200 |
| P  | 0.85305200  | -0.92729800 | 2.01343000  |
| P  | -1.20372800 | -2.24529000 | -0.03827500 |
| O  | 1.00910300  | -0.76364100 | -0.64382100 |
| N  | 4.01124400  | -1.16364500 | -0.06132200 |
| N  | 3.11630200  | 1.59794100  | 0.08805200  |
| N  | -2.70590600 | 1.28160000  | 0.25325100  |
| N  | -4.50073200 | -0.88566200 | -0.44535700 |
| C  | 5.00453900  | -0.61289800 | -0.74097700 |
| C  | 5.10315300  | 0.76788200  | -1.00519600 |
| H  | 5.97499900  | 1.07942500  | -1.57827600 |
| C  | 4.23273200  | 1.79394600  | -0.60978400 |
| C  | 6.09896900  | -1.49694300 | -1.26708100 |
| H  | 6.85000000  | -0.91803800 | -1.81666400 |
| H  | 5.68754200  | -2.26632900 | -1.93893300 |
| H  | 6.60136300  | -2.02925600 | -0.44416700 |
| C  | 4.60071100  | 3.19836000  | -0.99765900 |
| H  | 4.75786300  | 3.82358400  | -0.10441400 |
| H  | 3.79295300  | 3.66939500  | -1.57920100 |
| H  | 5.51826100  | 3.21680600  | -1.59676700 |
| C  | -3.80901700 | 1.99916900  | 0.05627000  |
| C  | -5.04815800 | 1.45613600  | -0.31939000 |
| H  | -5.86215300 | 2.16894700  | -0.44044200 |
| C  | -5.37696500 | 0.10624100  | -0.53563900 |
| C  | -3.74432400 | 3.48713000  | 0.25274100  |
| H  | -2.94960500 | 3.93172500  | -0.36564700 |
| H  | -3.51012200 | 3.73367500  | 1.30044800  |
| H  | -4.69795500 | 3.96036400  | -0.00724100 |
| C  | -6.80090500 | -0.21423100 | -0.88747600 |
| H  | -7.24334700 | -0.89470000 | -0.14312700 |
| H  | -6.85846600 | -0.72682800 | -1.86043500 |
| H  | -7.41248600 | 0.69391000  | -0.93489700 |
| C  | 0.28674900  | -1.19847500 | 0.35016000  |
| C  | -1.46809900 | 1.92107100  | 0.66411900  |
| H  | -0.99780600 | 2.47052000  | -0.16981600 |
| H  | -1.62494900 | 2.62341200  | 1.49732800  |
| H  | -0.76079700 | 1.15300000  | 1.01340100  |
| C  | -4.90618200 | -2.25814100 | -0.67787100 |
| H  | -4.03470100 | -2.91576400 | -0.55162400 |
| H  | -5.68098600 | -2.58532300 | 0.03509000  |
| H  | -5.29411700 | -2.40648200 | -1.69930100 |
| C  | 3.95362100  | -2.59518800 | 0.15819900  |
| H  | 3.09492700  | -2.81604700 | 0.80945900  |
| H  | 3.81326300  | -3.14887800 | -0.78527300 |
| H  | 4.86199100  | -2.97815300 | 0.65196700  |
| C  | 2.28285300  | 2.71274800  | 0.48343900  |
| H  | 2.84647100  | 3.48950000  | 1.02626400  |
| H  | 1.78827100  | 3.19230400  | -0.37970300 |
| H  | 1.49864800  | 2.33976500  | 1.15832700  |

Cartesian coordinates of the optimized geometry of TS-11 at PBE0-D3BJ/def2-SVP level of theory:

|    |             |             |             |
|----|-------------|-------------|-------------|
| Ga | -1.82637000 | -0.32167300 | -0.56778400 |
| Ga | 1.82646500  | -0.33232900 | -0.56233900 |
| P  | -1.64859000 | -1.34548900 | -2.60657600 |
| P  | 1.64972700  | -1.37836700 | -2.58996400 |
| O  | -0.00022700 | -0.31488000 | -0.35773700 |
| N  | -2.70081600 | -1.13186300 | 0.96365400  |
| N  | -2.55885300 | 1.46393700  | -0.35073000 |
| N  | 2.56315700  | 1.45350200  | -0.36191000 |
| N  | 2.69608800  | -1.12936400 | 0.97864900  |
| C  | -3.44086700 | -0.44317300 | 1.82214700  |
| C  | -3.72329100 | 0.92889400  | 1.69399300  |

|   |             |             |             |
|---|-------------|-------------|-------------|
| H | -4.34471900 | 1.35957300  | 2.47762400  |
| C | -3.31661700 | 1.81446200  | 0.67973000  |
| C | -4.02263800 | -1.15879900 | 3.00862900  |
| H | -4.69539700 | -1.96870700 | 2.68502300  |
| H | -4.58951700 | -0.47303200 | 3.64863800  |
| H | -3.22903700 | -1.62667600 | 3.61187900  |
| C | -3.77935000 | 3.24052900  | 0.78301800  |
| H | -4.39346500 | 3.51613400  | -0.08887500 |
| H | -2.92146600 | 3.93077900  | 0.79877500  |
| H | -4.37375900 | 3.40165900  | 1.68964000  |
| C | 3.32020500  | 1.81245300  | 0.66605800  |
| C | 3.72301200  | 0.93598500  | 1.68981500  |
| H | 4.34439500  | 1.37285800  | 2.47004700  |
| C | 3.43670600  | -0.43389800 | 1.83131100  |
| C | 3.78643800  | 3.23829500  | 0.75578300  |
| H | 4.40256300  | 3.50357100  | -0.11789400 |
| H | 4.37988200  | 3.40699900  | 1.66166200  |
| H | 2.93030000  | 3.93084500  | 0.76327700  |
| C | 4.01475700  | -1.13908500 | 3.02583900  |
| H | 4.68583100  | -1.95401500 | 2.71147100  |
| H | 3.21899500  | -1.59871000 | 3.63257800  |
| H | 4.58251100  | -0.44840500 | 3.65975900  |
| C | 0.00038100  | -1.17324600 | -2.18318700 |
| C | 2.17749900  | 2.40760400  | -1.37932000 |
| H | 1.65698300  | 1.87198500  | -2.18684800 |
| H | 1.49222800  | 3.17885300  | -0.98584900 |
| H | 3.04565600  | 2.91962800  | -1.82627300 |
| C | 2.43599900  | -2.53800200 | 1.18665800  |
| H | 3.36321500  | -3.12328000 | 1.30263000  |
| H | 1.80614500  | -2.71621300 | 2.07559700  |
| H | 1.90241400  | -2.93205900 | 0.30938300  |
| C | -2.44431200 | -2.54313600 | 1.15779400  |
| H | -1.91089300 | -2.92971500 | 0.27710400  |
| H | -1.81562700 | -2.73166700 | 2.04542300  |
| H | -3.37303800 | -3.12727800 | 1.26716700  |
| C | -2.16970600 | 2.42728900  | -1.35802800 |
| H | -3.03612700 | 2.94547400  | -1.80124900 |
| H | -1.48350200 | 3.19326300  | -0.95594700 |
| H | -1.64908400 | 1.89856000  | -2.17002500 |

## 7. References

- [1] M. K. Sharma, C. Wölper, G. Haberhauer, S. Schulz, *Angew. Chem., Int. Ed.* 2021, **60**, 6784; *Angew. Chem.* 2021, **133**, 6859.
- [2] M. K. Sharma, P. Dhawan, C. Helling, C. Wölper, S. Schulz, *Chem. Eur. J.* 2022, **28**, e202200444.
- [3] A. J. Arduengo III, H. V. R. Dias, R. L. Harlow, M. Kline, *J. Am. Chem. Soc.* 1992, **114**, 5530.
- [4] V. Lavallo, Y. Canac, C. Präsang, B. Donnadieu, G. Bertrand, *Angew. Chem., Int. Ed.* **2005**, *44*, 5705; *Angew. Chem.* 2005, **117**, 5851.
- [5] G. R. Fulmer, A. J. M. Miller, N. H. Sherden, H. E. Gottlieb, A. Nudelman, B. M. Stoltz, J. E. Bercaw, K. I. Goldberg, *Organometallics* 2010, **29**, 2176.
- [6] G. M. Sheldrick, *Acta Crystallogr., Sect. A.* 1990, **A46**, 467.
- [7] G. M. Sheldrick, SHELX 2014, Program for the Refinement of Crystal Structures, University of Göttingen: Göttingen, Germany, 2014.
- [8] G. M. Sheldrick, *Acta Crystallogr., Sect. A* 2008, **A64**, 112.
- [9] C. B. Hübschle, G. M. Sheldrick, B. Dittrich, *J. Appl. Crystallogr.* 2011, **44**, 1281–1284.
- [10] M. J. Frisch, G. W. Trucks, H. B. Schlegel, G. E. Scuseria, M. A. Robb, J. R. Cheeseman, G. Scalmani, V. Barone, G. A. Petersson, H. Nakatsuji, X. Li, M. Caricato, A. V. Marenich, J. Bloino, B. G. Janesko, R. Gomperts, B. Mennucci, H. P. Hratchian, J. V. Ortiz, A. F. Izmaylov, J. L. Sonnenberg, D. Williams-Young, F. Ding, F. Lipparini, F. Egidi, J. Goings, B. Peng, A. Petrone, T. Henderson, D. Ranasinghe, V. G. Zakrzewski, J. Gao, N. Rega, G. Zheng, W. Liang, M. Hada, M. Ehara, K. Toyota, R. Fukuda, J. Hasegawa, M. Ishida, T. Nakajima, Y. Honda, O. Kitao, H. Nakai, T. Vreven, K. Throssell, J. A. Montgomery, Jr.; , J. E. Peralta, F. Ogliaro, M. J. Bearpark, J. J. Heyd, E. N. Brothers, K. N. Kudin, V. N. Staroverov, T. A. Keith, R. Kobayashi, J. Normand, K. Raghavachari, A. P. Rendell, J. C. Burant, S. S. Iyengar, J. Tomasi, M. Cossi, J. M. Millam, M. Klene, C. Adamo, R. Cammi, J. W. Ochterski, R. L. Martin, K. Morokuma, O. Farkas, J. B. Foresman, D. J. Fox, *Gaussian 16, Revision A.03*, Gaussian, Inc., Wallingford CT, 2016.
- [11] a) J. P. Perdew, K. Burke, M. Ernzerhof, *Phys. Rev. Lett.* 1996, **77**, 3865. b) J. P. Perdew, K. Burke, M. Ernzerhof, *Phys. Rev. Lett.* 1997, **78**, 1396.
- [12] C. Adamo, V. Barone, *J. Chem. Phys.* 1999, **110**, 6158.
- [13] S. Grimme, S. Ehrlich, L. Goerigk, *J. Comp. Chem.* 2011, **32**, 1456
- [14] F. Weigend, R. Ahlrichs, *Phys. Chem. Chem. Phys.* 2005, **7**, 3297.
- [15] A. V. Marenich, C. J. Cramer, D. G. Truhlar, *J. Phys. Chem. B* 2009, **113**, 6378.
